# Supplementary material for: Proximal Femoral Nail Unlocked versus Locked (ProFNUL): a protocol for a multicentre, parallel-armed randomised controlled trial for the effect of femoral nail mode of lag screw locking and screw configuration in the treatment of intertrochanteric femur fractures
Source: PubMed Central journal article supplement — BMJ Open. 2020 Feb 10;10(2):e032640. doi: 10.1136/bmjopen-2019-032640 (PMC7044810; doi:10.1136/bmjopen-2019-032640), 2020-02-10
Supplement: bmjopen-2019-032640.draft_revisions.pdf [file bmjopen-2019-032640.draft_revisions.pdf]

# BMJ Open

BMJ Open is committed to open peer review. As part of this commitment we make the peer review history of every article we publish publicly available.

When an article is published we post the peer reviewers' comments and the authors' responses online. We also post the versions of the paper that were used during peer review. These are the versions that the peer review comments apply to.

The versions of the paper that follow are the versions that were submitted during the peer review process. They are not the versions of record or the final published versions. They should not be cited or distributed as the published version of this manuscript.

BMJ Open is an open access journal and the full, final, typeset and author-corrected version of record of the manuscript is available on our site with no access controls, subscription charges or pay-per-view fees (<http://bmjopen.bmj.com>).

If you have any questions on BMJ Open's open peer review process please email [info.bmjopen@bmj.com](mailto:info.bmjopen@bmj.com)

# BMJ Open

**Proximal Femoral Nail Unlocked Vs Locked (ProFNUL): A protocol for a multicentre, parallel armed randomised controlled trial for the effect of femoral nail screw configuration and mode of lag screw locking in the treatment of intertrochanteric femur fractures.**

|                               |                                                                                                                                                                                                                                                                                                                                                                                                                                                                                                  |
|-------------------------------|--------------------------------------------------------------------------------------------------------------------------------------------------------------------------------------------------------------------------------------------------------------------------------------------------------------------------------------------------------------------------------------------------------------------------------------------------------------------------------------------------|
| Journal:                      | <i>BMJ Open</i>                                                                                                                                                                                                                                                                                                                                                                                                                                                                                  |
| Manuscript ID                 | bmjopen-2019-032640                                                                                                                                                                                                                                                                                                                                                                                                                                                                              |
| Article Type:                 | Protocol                                                                                                                                                                                                                                                                                                                                                                                                                                                                                         |
| Date Submitted by the Author: | 28-Jun-2019                                                                                                                                                                                                                                                                                                                                                                                                                                                                                      |
| Complete List of Authors:     | Sivakumar, Arjun; The University of Adelaide Adelaide Medical School, Centre for Orthopaedic & Trauma Research (COTR)<br>Thewlis, Dominic; The University of Adelaide Adelaide Medical School, Centre for Orthopaedic & Trauma Research<br>Ladurner, Andreas; Royal Adelaide Hospital, Department of Orthopaedics & Trauma<br>Edwards, Suzanne; The University of Adelaide, Adelaide Health Technology Assessment<br>Rickman, Mark; Royal Adelaide Hospital, Department of Orthopaedics & Trauma |
| Keywords:                     | Clinical trials < THERAPEUTICS, ORTHOPAEDIC & TRAUMA SURGERY, Fracture Fixation, Orthopaedic Fixation Devices, Hip Fractures, Intramedullary nailing                                                                                                                                                                                                                                                                                                                                             |
|                               |                                                                                                                                                                                                                                                                                                                                                                                                                                                                                                  |

SCHOLARONE™  
Manuscripts

1  
2  
3 **Title:** Proximal Femoral Nail Unlocked Vs Locked (ProFNUL): A protocol for a multicentre, parallel  
4  
5 armed randomised controlled trial for the effect of femoral nail screw configuration and mode of lag  
6  
7 screw locking in the treatment of intertrochanteric femur fractures.  
8  
9

10  
11  
12  
13  
14 **Authors:** Arjun Sivakumar<sup>1</sup>, Dominic Thewlis<sup>1</sup>, Andreas Ladurner<sup>2</sup>, Suzanne Edwards<sup>3</sup>, Mark  
15  
16 Rickman<sup>1,2</sup>  
17

18  
19 <sup>1</sup>Centre for Orthopaedic & Trauma Research, University of Adelaide, South Australia, Australia  
20

21  
22 <sup>2</sup>Department of Orthopaedics & Trauma, Royal Adelaide Hospital, South Australia, Australia  
23

24  
25 <sup>3</sup>Adelaide Health Technology Assessment, University of Adelaide, South Australia, Australia  
26  
27  
28  
29

30  
31 **Corresponding Author:**  
32

33 Arjun Sivakumar  
34

35  
36 arjun.sivakumar@adelaide.edu.au  
37

38  
39 Adelaide Health and Medical Science Building,  
40

41 Cnr North Terrace and George Street  
42

43 Adelaide SA 5000  
44

45  
46 83132621  
47  
48  
49  
50  
51

52 **Keywords:**  
53

54 Hip Fractures, Clinical Trial, Fracture Fixation, Orthopaedic Fixation Devices, Intramedullary nailing  
55  
56  
57

58 **Word Count:** 3948  
59  
60

**ABSTRACT:****Introduction:**

Intertrochanteric fractures are common fragility injuries in the elderly. Surgical fixation using intramedullary devices are one of the widely used management options. To date, evidence demonstrating the effects of lag screw configuration and the mode of lag screw locking in these devices is lacking. The purpose of this study is to investigate whether the lag screw configuration (single interlocking vs. integrated dual interlocking screw) and the mode of lag screw locking (static vs. dynamic) of a femoral nail device result in differences in clinical and functional outcomes.

**Methods and analysis:**

A multicentre, pragmatic, single-blinded randomised controlled trial with a three-arm parallel group design is proposed. Nine-hundred intertrochanteric fracture patients (A1 and A2 AO/OTA) will be randomised to fracture treatment using a Gamma3™ nail (Stryker) (proximally dynamic) or a Trigen™ Intertan™ nail (Smith and Nephew) in a dynamic or static lag screw configuration. The primary outcome measure consists of radiological evidence of device failure within six months following surgery, with failure being defined as breakage of the femoral nail, distal locking screw, a change in Tip-Apex Distance of more than 10mm or lag screw cut out through the femoral head. Secondary outcomes include surgical data (operation time, fluoroscopy time), complications (surgical site infection, reoperation, patient death), return to mobility and home circumstances, functional independence, Hip function and Pain. Patients with AMTS score > 8 will be asked to participate in 3D gait analysis at six weeks and six months to assess hip biomechanics from this cohort. Additional secondary measures of gait speed, hip range of motion, joint contact and muscle forces and gross activity monitoring patterns will be obtained in this subgroup.

**Ethics and dissemination:**

The Central Adelaide Local Health Network Human Research Ethics Committee has approved the protocol for this RCT (HREC/17/RAH/433). The results will be disseminated via peer-reviewed publications and presentations at relevant conferences.

**Trial Registration:**

This clinical trial has been registered on the Australia New Zealand Clinical Trials Registry (ANZCTR): ACTRN12618001431213.

**ARTICLE SUMMARY****Strengths and Limitations of this study:**

- ▶ Multicentre, pragmatic, single-blinded randomised controlled trial
- ▶ The first study to investigate the effects of femoral nail lag screw locking mode on clinical and functional outcomes.
- ▶ The first study to collect 3D motion capture data from these patients post-operatively.
- ▶ Powered to detect differences in device failure between the three parallel arm groups in a large sample size (900).
- ▶ Limitations of the study include an unpredictable loss to follow up from death or failure to attend.

## INTRODUCTION:

### Background and Rationale

Proximal femur fractures are a highly prevalent injury in the elderly,<sup>1,2</sup> with an estimated 1.31 million fractures occurring worldwide each year.<sup>3,4</sup> With a growing elderly population resulting from an increasing life expectancy,<sup>5</sup> there is an increasing global incidence of these fractures,<sup>5-9</sup> projected to reach 6.26 million by the year 2050.<sup>10</sup> Fractures within the intertrochanteric region represent approximately half of all proximal femur fractures.<sup>11</sup> Treatment typically consists of surgical fixation using either intramedullary (e.g. proximal femoral nail (PFN, Synthes™)) or extramedullary (e.g. Dynamic Hip Screw (DHS, Synthes™)) fixation devices.

Since its introduction in the 1990s, intramedullary fixation has become increasingly popular,<sup>12</sup> with the number of implanted femoral nails surpassing the number of extramedullary fixation devices in the united states in 2008.<sup>13</sup> Similar trends in device preference have also been recorded in Australia.<sup>14</sup> The increasing clinical use of the technique can be attributed to a number of factors, which in part relate to the biomechanical advantages of intramedullary fixation. The medialised implant position supports an in-line load distribution within the femur,<sup>15,16</sup> which shortens the lever arm between the hip joint and the implant, decreasing bending moments on the implant,<sup>17</sup> and providing more effective stabilisation at the fracture site.<sup>18,19</sup> This is advantageous particularly in elderly patients where immediate weight bearing mobilisation is an objective. Additional advantages over extramedullary fixation devices described in the literature include a shorter incision length, less operative time and lower intra-operative blood loss,<sup>20</sup> all which are deemed beneficial to recovery from surgery and the risk of complications.<sup>21</sup>

Numerous types of intramedullary fixation devices are available for clinical use,<sup>22</sup> however the optimum implant choice remains unknown.<sup>23</sup> While there is evidence to support the use of these devices in the treatment of intertrochanteric (IT) fractures, the evidence demonstrating whether variations in design characteristics influence patient clinical outcomes is conflicting.<sup>12, 24-26</sup> As no

1  
2  
3 rationale behind implant selection can be drawn from the literature, there is considerable diversity  
4  
5 regarding the choice of implant between clinicians.<sup>27</sup>  
6  
7

8 The Gamma3™ nail (Stryker) is a well-established and widely used current generation single lag screw  
9  
10 intramedullary device<sup>12</sup> which shows good clinical and radiographic outcomes.<sup>28-30</sup> However,  
11  
12 complications still exist, with the most frequently reported complication being cut-out of the lag screw  
13  
14 through the femoral head,<sup>31-33</sup> with an incidence rate ranging between 4% and 8%.<sup>34-36</sup> The Trigen™  
15  
16 Intertan™ nail (Smith & Nephew) is a similar current generation intramedullary device, featuring a  
17  
18 dual lag screw configuration comprised of a larger superior lag screw and a smaller screw integrated  
19  
20 within the superior screw.<sup>37</sup> Together, this dual-oval shaped composite screw allows for linear  
21  
22 compression of the fragments at the fracture site while providing anti-rotation properties.<sup>38</sup> Clinical  
23  
24 studies evaluating the Intertan nail against other single screw devices have recorded a significant  
25  
26 reduction in the occurrences of implant failure, fracture site non-union, mal-union, lag screw cut out  
27  
28 and uncontrolled varus fracture collapse.<sup>37-41</sup> Several authors have postulated the reduced  
29  
30 complication rate being attributed to the design of this nail.<sup>37</sup> Moreover, ex vivo biomechanical  
31  
32 studies have demonstrated superior biomechanical results with the Intertan™ nail.<sup>42-45</sup> However,  
33  
34 despite the Gamma3™ nail and Trigen™ Intertan™ nail both being well-established implant choices  
35  
36 used in the treatment of these fractures, very little direct comparative clinical evidence exists between  
37  
38 these nails.  
39  
40  
41  
42  
43  
44

45 A meta-analysis by Ma et al<sup>46</sup> found only nine papers, four of which included the Gamma3™ and the  
46  
47 Intertan™. Of these four, three were randomised controlled trials comparing the two devices, but  
48  
49 with relatively small cohort sizes. From these studies, the Intertan™ nail was shown to result in a lower  
50  
51 incidence of implant cut out and femoral fractures which was of statistical significance. No statistically  
52  
53 significant differences in time to union and post-operative complications were found between devices.  
54  
55 Ma et al highlighted that a limitation of this statistical analysis was the relatively small sample size of  
56  
57 the studies included, and indicated a need for more high quality RCTs to yield a more convincing test  
58  
59  
60

1  
2  
3 power.<sup>46</sup> Hence, the literature reveals limited evidence of whether design characteristics of femoral  
4  
5 nails affect clinical and patient outcomes in the treatment of trochanteric fractures.  
6  
7

8  
9 In addition to the choice of the intramedullary implants, other aspects of these devices used in the  
10  
11 practical management of intertrochanteric fractures need further evaluation. This includes the mode  
12  
13 of lag screw fixation (static or dynamic). Technically, both the Gamma3™ and Intertan™ nails can be  
14  
15 used in static or dynamic modes of the lag screw. In the dynamic mode, fracture collapse occurs  
16  
17 under physiological loading, resulting in macro and micromotion of the fracture fragments as well as  
18  
19 compression/ apposition of fracture fragments,<sup>47-49</sup> desired to stimulate fracture healing. However,  
20  
21 excessive sliding of the lag screw has been shown by some authors to lead to mechanical  
22  
23 complications and negatively affect patient function.<sup>50-52</sup>  
24  
25

26  
27 Whilst there is evidence highlighting a reduced risk of lag screw cut out when utilizing a sliding lag  
28  
29 screw in extramedullary devices,<sup>51, 53, 54 55, 56</sup> there is a paucity of similar evidence relating to the use  
30  
31 of intramedullary devices. One study compared the static and dynamic modes of the proximal lag  
32  
33 screw in the Gamma3™ nail in 80 patients.<sup>57</sup> From this study, no statistically or clinically significant  
34  
35 difference in Harris Hip Scores, time to fracture healing or length of hospital stay was found. No such  
36  
37 comparative evidence exists for the Intertan™ nail. Moreover, no clinical studies to date, comparing  
38  
39 one intramedullary device to another has made any note of which mode of the lag screw was  
40  
41 employed. Consequently, considerable variance in practice can be seen between clinicians.  
42  
43  
44

45  
46 For the Gamma3 nail, it is suggested by Stryker in their operative technique guide that the device  
47  
48 has to be used in the dynamic mode, with the use of the nail in a static mode considered off label.<sup>58</sup>  
49

50  
51 For the Intertan nail (Smith & Nephew), this decision is stated in their surgical technique guide as  
52  
53 optional with both modes considered on label,<sup>59</sup> and left to the operating surgeons decision.  
54

55  
56 Considering the substantial costs attributed to the management of intertrochanteric fractures, we  
57  
58 believe that more evidence is required to evaluate the effectiveness of a single or dual screw femoral  
59  
60 nail, as well the use of these devices in the static and dynamic modes. Moreover, no previous studies



1  
2  
3 have compared postoperative lower extremity biomechanics in intertrochanteric fracture patients  
4 treated with these devices. This proposed multicentre, parallel, three-arm randomised controlled trial  
5  
6 has been designed to fill these gaps in knowledge, and will include a two-way comparison between  
7  
8 the Gamma3™ (dynamic) and Intertan™ (dynamic) nails, as well as the Intertan™ (dynamic) and  
9  
10 Intertan™ (static) nails.  
11  
12  
13  
14

## 15 **Objectives:**

### 16 **Primary Objective**

17  
18 The aim of this RCT is to investigate if there are differences in failure rates between the surgical  
19  
20 management of intertrochanteric fractures using a single screw or dual screw femoral nail, as well as  
21  
22 when using a femoral nail in either the static or dynamic modes of the lag screw.  
23  
24  
25  
26  
27

28 It is hypothesized there will be no difference in failure rates between patients managed with a single  
29  
30 screw or dual screw femoral nail device. It is also hypothesized that there will be no difference in  
31  
32 failure rates between patients managed with a femoral nail in the static or dynamic mode of the lag  
33  
34 screw.  
35  
36  
37

### 38 **Secondary Objectives**

39  
40 Several secondary objectives will also be studied for this RCT to evaluate the effectiveness of the  
41  
42 devices used by quantifying and drawing inferences from observed differences between treatment  
43  
44 groups in:  
45  
46  
47

- 48 ▶ Intraoperative surgical data (Operation time, fluoroscopy time, blood loss, Tip-Apex  
49 Distance)
- 50
- 51 ▶ Pain within six months after surgery (VAS Pain Score).
- 52
- 53 ▶ Patient function (Functional Independence Measure) and Hip function (Harris Hip Score)  
54  
55 within six months after surgery.  
56  
57  
58  
59  
60

- 1  
2  
3 ▶ Post-operative hip biomechanics using objective measures from gait analysis up to six  
4  
5 months after surgery.  
6  
7

## 8 **Trial Design**

9

10  
11 The ProFNUL study is a multicentre, pragmatic, single-blinded randomised controlled trial with a  
12  
13 three-arm parallel group design.  
14  
15

## 16 **METHODS AND ANALYSIS**

17

18  
19 Patients will be randomised using an online computerised sequence generation service to test if  
20  
21 there is a difference in outcomes between the treatment interventions. Recruitment, medical and  
22  
23 surgical data collection will take place at the Royal Adelaide Hospital and Queen Elizabeth Hospital  
24  
25 with other sites added later as required for participant numbers. Radiographic images will be  
26  
27 collected at a diagnostic imaging practice and 3D motion capture data will be conducted at The  
28  
29 University of Adelaide, South Australia.  
30  
31

32  
33 This RCT has been registered with the Australian New Zealand Clinical Trials Registry (ANZCTR). Trial  
34  
35 registration data is shown in Table 1.  
36  
37

38  
39 This study protocol was developed in accordance with the Standard Protocol Items:  
40  
41 Recommendations for Interventional Trials (SPIRIT) statement.  
42  
43

## 44 **Patient and Public Involvement**

45

46  
47 Patients and public were not involved in the design, conduct or reporting of this study.  
48  
49  
50  
51  
52  
53  
54  
55  
56  
57  
58  
59  
60

**Table 1. Trial Registration Data**

| Data Category                                 | Information                                                                                                                                                                                                                                                                                                                                                                                                                                                                                                   |
|-----------------------------------------------|---------------------------------------------------------------------------------------------------------------------------------------------------------------------------------------------------------------------------------------------------------------------------------------------------------------------------------------------------------------------------------------------------------------------------------------------------------------------------------------------------------------|
| Primary registry and trial identifying number | <a href="https://www.anzctr.org.au">https://www.anzctr.org.au</a> ACTRN12618001431213                                                                                                                                                                                                                                                                                                                                                                                                                         |
| Date of registration in primary registry      | 27/08/2018                                                                                                                                                                                                                                                                                                                                                                                                                                                                                                    |
| Secondary identifying numbers                 | None                                                                                                                                                                                                                                                                                                                                                                                                                                                                                                          |
| Source of monetary or material support        | Smith & Nephew Pty Ltd                                                                                                                                                                                                                                                                                                                                                                                                                                                                                        |
| Primary sponsor                               | Royal Adelaide Hospital, Dept. of Orthopaedics & Trauma<br>Contact person: MR (mark.rickman@sa.gov.au)                                                                                                                                                                                                                                                                                                                                                                                                        |
| Secondary sponsor                             | University of Adelaide, Centre for Orthopaedic & Trauma Research.<br>Contact person: AS (arjun.sivakumar@adelaide.edu.au)<br>Contact person: DT (dominic.thewlis@adelaide.edu.au)                                                                                                                                                                                                                                                                                                                             |
| Contact for public queries                    | MR (mark.rickman@sa.gov.au)                                                                                                                                                                                                                                                                                                                                                                                                                                                                                   |
| Contact for scientific queries                | DT (dominic.thewlis@adelaide.edu.au)                                                                                                                                                                                                                                                                                                                                                                                                                                                                          |
| Public title                                  | Evaluating the treatment methods of proximal femur fractures in elderly trauma patients                                                                                                                                                                                                                                                                                                                                                                                                                       |
| Scientific title                              | A multi-centre, single-blinded prospective randomised controlled trial of the Gamma3™ intramedullary nail to the unlocked and locked Intertan™ intramedullary nail for the treatment of proximal femur fractures.                                                                                                                                                                                                                                                                                             |
| Countries of recruitment                      | Australia.                                                                                                                                                                                                                                                                                                                                                                                                                                                                                                    |
| Health problem studied                        | Proximal femur fracture                                                                                                                                                                                                                                                                                                                                                                                                                                                                                       |
| Interventions                                 | Gamma3™ Trochanteric nail (Unlocked proximally)<br>Trigen™ Intertan™ Trochanteric nail (Unlocked proximally)<br>Trigen™ Intertan™ Trochanteric nail (Locked proximally)                                                                                                                                                                                                                                                                                                                                       |
| Key inclusion and exclusion criteria          | Inclusion criteria: Traumatic extracapsular hip fracture, Closed injury, Patient aged over 60 years, Ability to be followed for up to six months, Presentation to hospital within 14 days of injury<br>Exclusion criteria: Patients with concomitant injuries affecting treatment and rehabilitation of the affected limb, Patients with associated neurovascular injuries requiring immediate surgery, Patients where consent is refused, Patient with limited English proficiency including family members. |
| Study type                                    | Randomised controlled trial                                                                                                                                                                                                                                                                                                                                                                                                                                                                                   |
| Date of first enrolment                       | 05/09/2018                                                                                                                                                                                                                                                                                                                                                                                                                                                                                                    |
| Target sample size                            | 900                                                                                                                                                                                                                                                                                                                                                                                                                                                                                                           |
| Recruitment status                            | Recruiting                                                                                                                                                                                                                                                                                                                                                                                                                                                                                                    |
| Primary Outcome                               | Device failure (time point: up to 6 months after intervention)                                                                                                                                                                                                                                                                                                                                                                                                                                                |
| Key secondary outcomes                        | Incidence of Injury specific complications (time point: 6 months)<br>Functional Independence (time point: 6 months)<br>Reoperation incidence (time point: 6 months)<br>Return to mobility circumstances (time point: 6 months)<br>Hip joint range of motion (time point: 6 months)<br>Hip joint contact forces (time point: 6 months)<br>Post-operative hip muscle function (abductors, flexors, extensors) (time point: 6 months)                                                                            |

## Eligibility

Patients over 60 years of age presenting to any of the participating hospitals with an isolated, closed intertrochanteric fracture will be recruited against the following eligibility criteria:

### Inclusion criteria

1. Traumatic intertrochanteric femur fracture (A1 and A2 AO/OTA) where a decision has been made for surgical management using a femoral nail.
2. Closed injury.
3. Patients aged over 60 years.
4. Presentation to hospital within 14 days of injury.

### Exclusion criteria

1. Patients with concomitant injuries affecting treatment and rehabilitation of the affected limb.
2. Patients with associated neurovascular injuries requiring immediate surgery.
3. Patients with limited English proficiency including family members.
4. Patients where consent is refused.

All eligible patients will be provided with a study information sheet and consent form by the hospital medical staff. Randomisation will then occur once consent has been obtained.

## Randomisation and blinding

Patients will be randomised with allocation sequences generated using a computerised generation system managed by the Griffith University's Clinical Trial Unit (Griffith University, QLD, Australia) with stratified allocation factors of Abbreviated Mental Health Test Score (AMTS) and gender.

Patients will be blinded to their allocation until the conclusion of the trial to reduce bias in patient reported outcome measures. The statistician performing the analysis will also be blinded to the group allocation. Surgeons and researchers will not be blinded to allocation.

### Standard Treatment Pathway

The clinical pathway for recruited patients will be unchanged from the routine for each institution; surgery is typically carried out within 24-48 hours, and no changes will be necessary to any part of the surgical episode with the exception of the individual device used and mode of proximal locking as directed by the randomisation outcome. All fractures will be compressed proximally using the compression mechanism of the device being used at the time of surgery, just prior to the nail being either locked proximally or left unlocked. Similarly, post-operative management will remain unchanged from routine, including discharge timing and destination. All patients will be mobilised fully weight bearing as soon as possible after surgery.

### Allocated Interventions

A total of 900 trauma patients with IT (31A1 and 31A2 AO/OTA) will be randomised to receive one of the three femoral nail interventions.

- ▶ Gamma3™ (Stryker) (Locked proximally)
- ▶ Intertan™ (Smith & Nephew) (Unlocked proximally)
- ▶ Intertan™ (Smith & Nephew) (Locked proximally)

### Participant Flow Timeline

A succinct summary of the patient timeline is described by Figure 1. Once a patient has been recruited and randomised, a baseline patient registration assessment will be completed through the use of an online form. Surgery will then proceed at the earliest available opportunity as per routine for the hospital. Following surgery, an operative information form will be completed by the operating surgeon using another online form. Upon patient discharge, medical staff will complete a patient discharge online form which includes a clinical assessment measure of functional independence (FIM score). Following discharge, follow up appointments will be scheduled to coincide with six weeks and six months with appointment letters and x-ray referrals sent from the

1  
2  
3 Royal Adelaide Hospital. A week prior to each patients appointment, patients will be called to  
4  
5 confirm their appointments or reschedule, if required. AP and lateral hip radiographs will be taken,  
6  
7 followed by a clinical examination with an orthopaedic and trauma specialist, where measures of hip  
8  
9 pain (Visual Analog Scale from 0 to 10) and hip function (Harris Hip Score) will be recorded. At the six  
10  
11 month follow up, AP and lateral hip radiographs will be taken, followed by a similar clinical  
12  
13 examination with an orthopaedic and trauma specialist. At this appointment, a measure of  
14  
15 functional independence (FIM score) will be recorded in addition to VAS and HHS scores.  
16  
17

18  
19 Patients with an AMTS score 8 or above will be included in a 'biomechanics sub-group' where 3D  
20  
21 gait analysis will be performed at the six weeks and six month follow ups immediately following the  
22  
23 clinical examination. After the gait analysis, patients will be provided with a wrist worn activity  
24  
25 monitor (GeneActiv Original, Activinsights Ltd, Kimbolton, UK, 100 Hz) to wear for seven days at a  
26  
27 time, providing information on 24 hour gross physical activity patterns of these patients. Patients  
28  
29 will be asked to complete a sleep log during this period to better distinguish sedentary time from  
30  
31 sleep. After seven days, patients will post the monitors back via pre-paid return envelopes. Patients  
32  
33 living rurally and unable to attend follow up appointments will have x-ray appointments organised at  
34  
35 locations convenient to them collected over the phone by an orthopaedics and trauma specialist.  
36  
37 Patients presenting to clinics reporting complications, will be reviewed by a clinician and radiographs  
38  
39 taken, as per standard procedure. In these events, the occurrence of these complications is recorded  
40  
41 against the patient's hospital number.  
42  
43  
44  
45  
46  
47  
48  
49  
50  
51  
52  
53  
54  
55  
56  
57  
58  
59  
60

Figure 1. Patient flow diagram

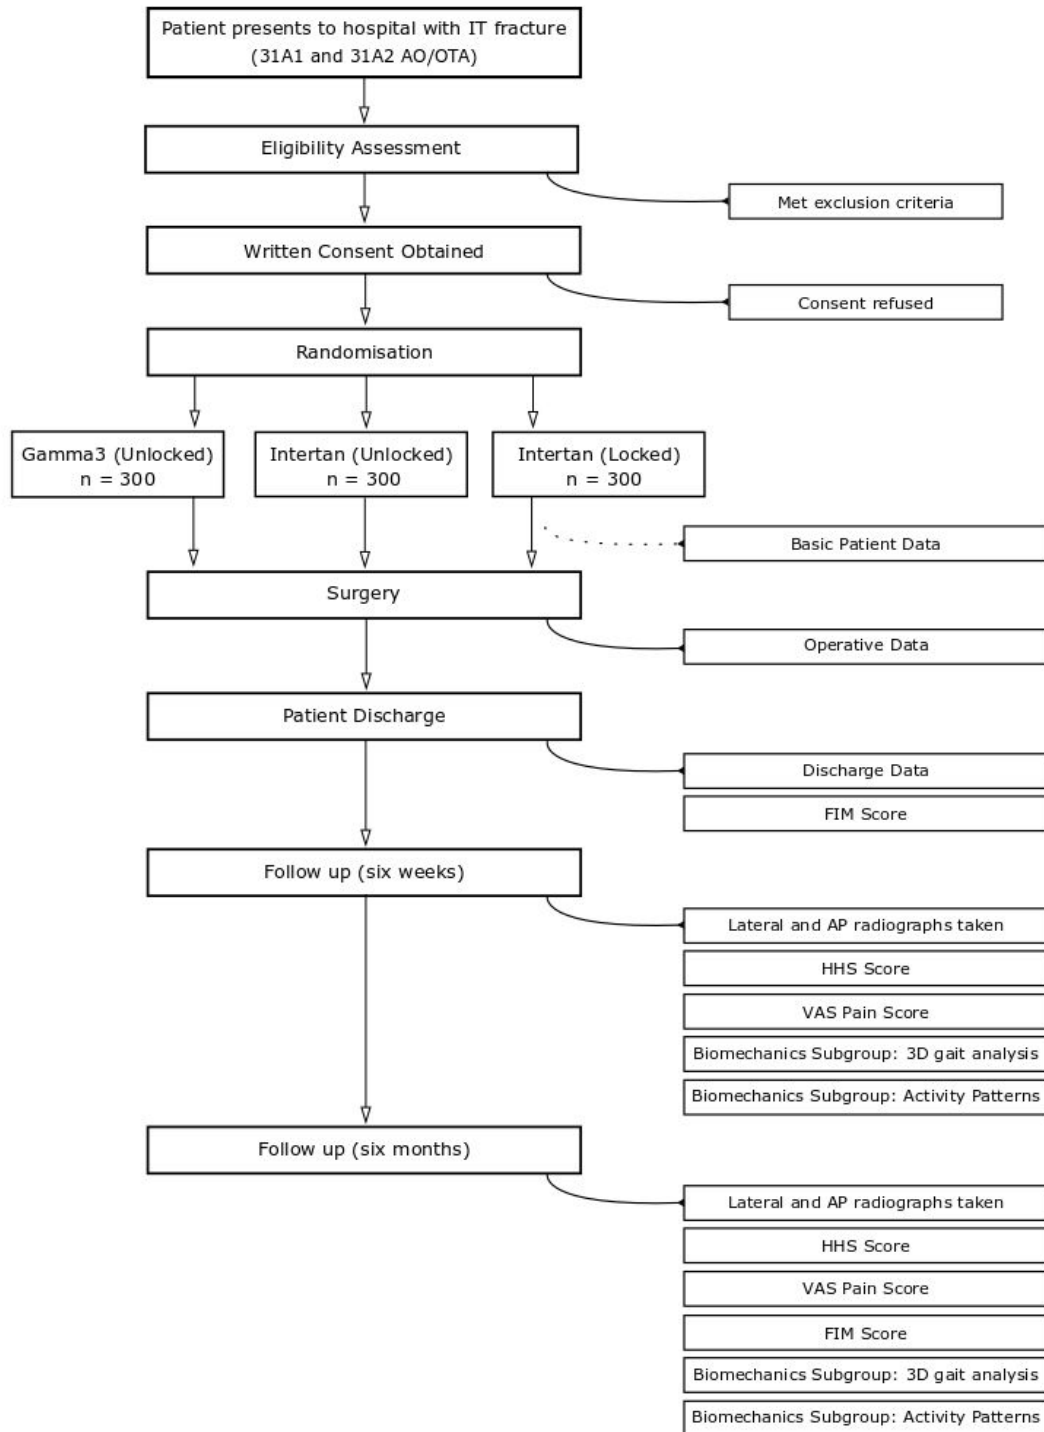

## Outcomes

### Primary outcome measure

The primary outcome measure is radiological evidence of device failure at any point up to six months following surgery and will be assessed via AP and lateral radiographs. Device failure will be defined as the occurrence of any of the following:

1. Breakage (mechanical fracture) of the femoral nail.<sup>60</sup>
2. Breakage (mechanical fracture) of the distal locking screw.
3. Protrusion of lag screw through the cortex of the femoral head (cut out).<sup>61</sup>
4. A change in TAD of more than 10mm.

The Tip-Apex Distance (TAD),<sup>62</sup> measured from the tip of the lag screw to the apex of the femoral cortex in lateral and AP radiographs is generally used in clinical practice and is desirable for this measurement to be under 25 mm. TADs larger than 25mm have been shown to serve as an accurate indicator of future protrusion of a lag screw through the femoral head (cut out).<sup>63</sup> The TAD has been shown to be reproducible to within 2-3 mm between measurements<sup>62,64</sup> and highlighted to change by 2-3 mm over time.<sup>65</sup> A change in TAD of more than 10 mm has therefore been selected as a reference level which represents failure of the intramedullary device to maintain fracture stability.

### Secondary outcome measures

Secondary outcomes will also assess differences in the effectiveness between the interventions using several measures, including:

#### *Functional Independence: FIM score*

The FIM score is a widely used instrument for measuring the severity of patient disability and dependence in rehabilitation medicine.<sup>66</sup> It has been demonstrated as a validated and reliable measure<sup>67</sup> with good interrater reliability of the total score (Intraclass correlation coefficient of 0.96).<sup>68</sup>



### *Pain: Visual Analog Scale*

Pain will be assessed using a visual analog scale (VAS)<sup>69</sup> of categorical values from 0 to 10, with 0 indicating no pain, and 10 indicating excruciating pain. The VAS pain score is a commonly used and validated measurement for patient reported acute pain.<sup>70</sup>

### *Hip Function: Harris Hip Score*

Hip function will be assessed by a clinician using the Harris Hip Score to evaluate hip function and disability across domains of pain, function, absence of deformity, and range of motion.<sup>71</sup> The Harris hip score is a well performing<sup>72</sup> and frequently used clinician based outcome measure that has shown high reliability and validity in evaluating hip function.<sup>73,74</sup>

### *Perioperative Data*

Perioperative data recorded in this trial will include surgery time, fluoroscopy time, Intra-operative Tip-Apex Distance, length of hospital stay, union time and intra-operative complications, all of which are commonly reported as valid measures across a number randomised controlled trials evaluating femoral nail devices.<sup>46,75-79</sup> Intra-operative blood loss will also be recorded, however the reliability of this measure is unclear due to its underestimation during hip fracture surgery.<sup>80</sup>

### *Injury/Surgery Specific Complications*

Surgical complications not only affect clinical outcome parameter, but appear to be a significant and often long-term predictor of patient postoperative psychosocial outcomes.<sup>81,82</sup> Complications recorded will include the number and type of injury and surgery specific events and complications including, technical complications, surgical site infection, unplanned surgery and death up to one year following surgery. This has been reliably collected in previous studies.<sup>83,84</sup>

### *Re-operation*

The number of patients presenting to clinic requiring reoperation will be recorded in this trial. The rate of re-operation is a reliable measure in assessing quality of medical treatment.<sup>85</sup>

### *General Medical Complications*

In this study, the number of patients suffering from general medical complications will be recorded. This has been collected and reported as a valid measure in the literature.<sup>82</sup>

### **Secondary outcome measures: Biomechanics Sub-group**

#### *Physical Mobility - Timed Up and Go*

Physical mobility will be assessed using the timed “Up & Go” test (TUG) which has been widely used in the literature<sup>86</sup> and noted to be a practical and reliable performance indicator of physical mobility.<sup>87</sup> The validity of the TUG has been highlighted with its correlation with a number of mobility and performance measures such as the Berg Balance Scale<sup>88</sup> and gait speed<sup>87,89</sup> with normative reference values available.<sup>90</sup>

#### *Hip Biomechanics and Function: 3D Motion Analysis*

Using a 10 camera motion capture system (Vicon Motion Systems Ltd., Oxford, UK, 100 Hz), 3D kinematic data will be collected as patients are asked to walk short distances between two marked points at their own comfortable pace. A set of 49 retroreflective markers will be placed on anatomical landmarks of each patient to identify positions of joints, in line with standardized position and coordinate system protocols established by the International Society of Biomechanics (ISB).<sup>91</sup> In addition to the recorded 3D marker trajectories using the above motion capture setup (Vicon Motion Systems Ltd., Oxford, UK, 100 Hz), ground reaction forces will be measured via two force platforms (AMTI Optima, Watertown, MA, 2000 Hz) and well as superficial muscle activity (i.e. activation, timing and amplitude) using passive surface electromyography electrodes (Delsys, Boston, MA, 2000 Hz, Contact Material 99.99% Silver, Inter-bar spacing 10mm, CMRR > 80 dB). These electrodes will be

1  
2  
3 placed on the hamstring (biceps femoris), gluteal muscles (gluteus maximus and gluteus medius),  
4 quadriceps (rectus femoris and vastus medialis) and hip adductor (adductor longus) of each leg, in line  
5 with SENIAM guidelines. This standardization ensures reliability in using 3D motion capture for the  
6 measurement gait parameters.<sup>92</sup>  
7  
8  
9

10  
11  
12 An OpenSim<sup>93</sup> model will be scaled using the 3D motion data alongside the Musculoskeletal Atlas  
13 Program software (MAP) to produce patient-tailored musculoskeletal models.<sup>94</sup> Dynamic simulations  
14 will be run on the musculoskeletal models using OpenSim to calculate objective outcome measures  
15 from gait analysis including (but not limited to):  
16  
17  
18  
19

- 20 ▶ Hip range of motion
  - 21 ▶ Hip joint contact forces
  - 22 ▶ Hip muscle force (simulated)
- 23  
24  
25  
26  
27  
28  
29

### 30 *Gait Speed*

31  
32 Gait speed will be calculated from the motion capture trials as a valid and reliable measure of physical  
33 performance during gait, commonly reported in the literature.<sup>95</sup>  
34  
35  
36  
37

### 38 *24-hour activity patterns*

39  
40 24-hour activity monitoring data over a seven day period will be collected at the six week and six  
41 month time points, using wearable accelerometers at the wrist (GeneActiv Original, Activinsights Ltd,  
42 Kimbolton, UK, 100 Hz). Patients will be asked to wear these activity monitors, at all times besides  
43 bathing. To better distinguish sedentary time from sleep time, patients will also be asked to fill in  
44 sleep logs. Physical activity measured using wrist worn accelerometers has been strongly correlated  
45 to gross motor activity patterns measured using waist worn monitors.<sup>96</sup> Wrist worn accelerometers  
46 will be used as opposed to waist or ankle worn accelerometers for better compliance.  
47  
48  
49  
50  
51  
52  
53  
54  
55  
56  
57  
58  
59  
60

### **Data Management:**

Outcome data will be entered electronically and stored in a password protected shared drive and backed up weekly to a password protected folder on the University of Adelaide's network. Only investigators will have access to the data.

### **Sample size**

Gamma3™ nail failure rates in the literature have been reported to vary from 2 to 15%.<sup>97,98</sup> We opted for a conservative failure estimate of 7.5% as it represents the mid-range of reported data.<sup>99</sup> A clinically significant difference between the two groups would be a difference of 5% between the two intervention groups. Therefore using a significance level of 0.05 and power of 80%, allowing for 30% loss to follow up at six months (including 10% mortality) and a 1.5 variance inflation factor to allow for repeated measurements over time results in a requirement for 300 patients in each of the 3 groups (control group - Unlocked Gamma3™ Nail, and each of the Intervention Groups - Unlocked & Locked Intertan™ Nail).

### **Statistical Analysis**

The primary outcome measure of device failure is considered a binary outcome (device failed/did not fail). A binary logistic regression model will be performed to assess the association between the outcome of device failure and the predictor of device type (Gamma3 Unlocked, Intertan Unlocked and Intertan Locked). Confounders of AMTS and gender will also be included in the model as covariates as they were stratification factors in the randomisation. Post-hoc comparisons will result in Odds Ratios, 95% confidence intervals, comparison P values and a global P value.

Some secondary outcomes are measured over two time periods. The FIM score is measured at patient discharge and at six months. Therefore, a linear mixed-effects model will be used for the outcome of FIM score and the interaction of time and device type, adjusting for repeated measurements over time as a random effect. A logarithmic transformation of the outcome may be

1  
2  
3 necessary. Similarly, as pain (VAS) and Harris Hip Score are measured at six weeks and six months,  
4  
5 linear mixed-effects models will be used for these outcomes. For perioperative continuous  
6  
7 outcomes, including surgery time, fluoroscopy time, Intra-operative Tip-Apex Distance, length of  
8  
9 hospital stay and fracture union time, the association with device type will be investigated using a  
10  
11 linear regression. For dichotomous secondary outcomes, including intra-operative complications,  
12  
13 injury specific complication rates, re-operation rates and general medical complication rates, the  
14  
15 association with device type will be investigated using binary logistic regression. Stratification  
16  
17 variables AMTS and gender will be included as covariates in all secondary regression models.  
18  
19  
20  
21 For the biomechanics subgroup, secondary measures of gait speed, hip range of motion, hip muscle  
22  
23 forces, and joint contact forces will be measured at six weeks and six months. Three linear mixed  
24  
25 effects models will be used with the device type (Gamma3 Unlocked, Intertan Unlocked and Intertan  
26  
27 Locked) as a fixed factor with timepoint as a repeated measure and the interaction of time and  
28  
29 device type. Post hoc pairwise comparisons will then be used to identify the differences in the  
30  
31 outcomes between the timepoints of six weeks and six months.  
32  
33  
34  
35  
36 An intention-to-treat analysis will be performed (and as randomised analysis to deal with protocol  
37  
38 non-adherence). Missing data will be handled on the basis of each outcome – if a patient is missing  
39  
40 outcome data for a particular regression, they will be excluded from that regression. However, if  
41  
42 they are not missing data for the remaining outcomes, they will be included in those analyses. The  
43  
44 use of linear mixed-effects models also retains patient data when there is missing data from only  
45  
46 one time period. Evidence for a statistically significant difference will be accepted as  $p < 0.05$ . The  
47  
48 statistical software that will be used is SAS 9.4 (SAS Institute Inc., Cary, NC, USA).  
49  
50

### 51 52 **Trial oversight**

53  
54  
55 The overall oversight of the trial will be under the responsibility of the head of the Department for  
56  
57 Orthopaedics and Trauma at the Royal Adelaide Hospital and supported by the University of  
58  
59 Adelaide's Centre for Orthopaedic & Trauma Research.  
60

### **Ethics and Dissemination**

This protocol has received ethics approval by the Central Adelaide Local Health Network Human Research Ethics Committee and will be conducted in accordance to the NHMRC National Statement of Ethical Conduct in Human Research. This clinical trial has been registered on the Australia New Zealand Clinical Trials Registry (ANZCTR): ACTRN12618001431213.

### **Authors contributions:**

MR, DT and AS contributed to the design and implementation of the study. AL will contribute to data collection and SE will contribute to the statistical analysis of the data. AS will be responsible for data collection, processing and analysis of the biomechanics subgroup. AS, AL, MR, DT and SE contributed to the writing of this manuscript. All investigators will communicate any protocol modifications such that amendments can be made to the relevant parties (ethics committee, trial registry).

### **Funding statement:**

This project will be funded through an investigator initiated research grant awarded by Smith & Nephew Inc Orthopaedic Division. DT is supported by a Career Development Fellowship (ID: 1126229) from the National Health and Medical Research Council.

### **Competing interests statement:**

This project is funded through an investigator initiated grant by Smith & Nephew Inc Orthopaedic Division (SN). SN had no input into the study.

### **Patient Consent:**

Obtained.

### **Protocol Version:**

Protocol Version 6. Date: 26 Jun 2019

## References

1. Boulton C, Bunning T, Johansen A, Judge A, Liddicoat M, Majrowski B, et al. National Hip Fracture Database: Annual Report 2017. United Kingdom: 2017.
2. Butt F, Hussain A, Khan A, Sharif M. Implants for Extracapsular Neck of Femur Fracture: Dynamic Hip Screw Versus Intramedullary Nailing. *J Ayub Med Coll Abbottabad*. 2017;29(4):697-701.
3. Harvey N, McCloskey E. Gaps and Solutions in Bone Health: A Global Framework For Improvement. 2016.
4. Johnell O, Kanis JA. An estimate of the worldwide prevalence, mortality and disability associated with hip fracture. *Osteoporos Int*. 2004;15(11):897-902.
5. Kanis JA, Oden A, McCloskey EV, Johansson H, Wahl DA, Cooper C, et al. A systematic review of hip fracture incidence and probability of fracture worldwide. *Osteoporos Int*. 2012;23(9):2239-56.
6. Kannus P, Parkkari J, Sievänen H, Heinonen A, Vuori I, Järvinen M. Epidemiology of hip fractures. *Bone*. 1996;18(1, Supplement 1):S57-S63.
7. Lippuner K, Golder M, Greiner R. Epidemiology and direct medical costs of osteoporotic fractures in men and women in Switzerland. *Osteoporosis International*. 2005;16(2):S8-S17.
8. Lyons AR. Clinical outcomes and treatment of hip fractures. *Am J Med*. 1997;103(2A):51S-63S; discussion S-4S.
9. Lakstein D, Hendel D, Haimovich Y, Feldbrin Z. Changes in the pattern of fractures of the hip in patients 60 years of age and older between 2001 and 2010: A radiological review. *Bone Joint J*. 2013;95-B(9):1250-4.
10. Cooper C, Campion G, Melton LJ. Hip fractures in the elderly: A world-wide projection. *Osteoporosis International*. 1992;2(6):285-9.
11. Jacob J, Desai A, Trompeter A. Decision Making in the Management of Extracapsular Fractures of the Proximal Femur - is the Dynamic Hip Screw the Prevailing Gold Standard? *Open Orthop J*. 2017;11:1213-7.
12. Knoke M, Gradl G, Ladenburger A, Tarkin IS, Pape H-C. Unstable Intertrochanteric Femur Fractures: Is There a Consensus on Definition and Treatment in Germany? *Clinical Orthopaedics and Related Research*. 2013;471(9):2831-40.
13. Anglen JO, Weinstein JN. Nail or plate fixation of intertrochanteric hip fractures: changing pattern of practice. A review of the American Board of Orthopaedic Surgery Database. *J Bone Joint Surg Am*. 2008;90(4):700-7.
14. ANZHF. Australia & New Zealand Hip Fracture Registry: Annual Report 2018. 2018.
15. Wolff J. *Das Gesetz der transformation der knochem*. Berlin : Hirschwald; 1892.
16. Kyle RF, Cabanela ME, Russell TA, Swiontkowski MF, Winkquist RA, Zuckerman JD, et al. Fractures of the proximal part of the femur. *Instr Course Lect*. 1995;44:227-53.
17. Haynes RC, Miles AW. Comparative dynamic evaluation of the sliding/characteristics of the Gamma nail: a biomechanical analysis. *Proc Inst Mech Eng H*. 1997;211(5):411-7.
18. Parker MJ, Handoll HH. Gamma and other cephalocondylic intramedullary nails versus extramedullary implants for extracapsular hip fractures in adults. *Cochrane Database Syst Rev*. 2010(9):CD000093.
19. Yu X, Wang H, Duan X, Liu M, Xiang Z. Intramedullary versus extramedullary internal fixation for unstable intertrochanteric fracture, a meta-analysis. *Acta Orthop Traumatol Turc*. 2018;52(4):299-307.

20. Leung KS, So WS, Shen WY, Hui PW. Gamma nails and dynamic hip screws for peritrochanteric fractures. A randomised prospective study in elderly patients. *J Bone Joint Surg Br.* 1992;74(3):345-51.
21. D'Arrigo C, Carcangiu A, Perugia D, Scapellato S, Alonzo R, Frontini S, et al. Intertrochanteric fractures: comparison between two different locking nails. *International Orthopaedics.* 2012;36(12):2545-51.
22. Sambandam SN, Chandrasekharan J, Mounasamy V, Mauffrey C. Intertrochanteric fractures: a review of fixation methods. *Eur J Orthop Surg Traumatol.* 2016;26(4):339-53.
23. Parker MJ, Handoll HH. Gamma and other cephalocondylic intramedullary nails versus extramedullary implants for extracapsular hip fractures in adults. *Cochrane Database Syst Rev.* 2008(3):CD000093.
24. Socci AR, Casemyr NE, Baumgaertner MPLMR. Implant options for the treatment of intertrochanteric fractures of the hip. *The Bone & Joint Journal.* 2017;99-B:128-33.
25. Yu J, Zhang C, Li L, Kwong JS, Xue L, Zeng X, et al. Internal fixation treatments for intertrochanteric fracture: a systematic review and meta-analysis of randomized evidence. *Sci Rep.* 2015;5:18195.
26. Giordano V, Ribeiro DN, Tinoco RG, Alvim TA, Giordano M, Freitas A, et al. A Survey of Current Practices and Preferences for Internal Fixation of Trochanteric Fractures of the Femur in Brazil. *Cureus.* 2018;10(3):e2286-e.
27. Nie B, Wu D, Yang Z, Liu Q. Comparison of intramedullary fixation and arthroplasty for the treatment of intertrochanteric hip fractures in the elderly: A meta-analysis. *Medicine (Baltimore).* 2017;96(27):e7446.
28. Giessauf C, Glehr M, Bernhardt GA, Seibert FJ, Gruber K, Sadoghi P, et al. Quality of life after pertrochanteric femoral fractures treated with a gamma nail: a single center study of 62 patients. *BMC Musculoskelet Disord.* 2012;13:214.
29. Kempf I, Grosse A, Taglang G, Favreul E. Gamma nail in the treatment of closed trochanteric fractures. Results and indications of 121 cases. *Orthopaedics & Traumatology: Surgery & Research.* 2014;100(1):75-83.
30. Yang YH, Wang YR, Jiang SD, Jiang LS. Proximal femoral nail antirotation and third-generation Gamma nail: which is a better device for the treatment of intertrochanteric fractures? *Singapore Med J.* 2013;54(8):446-50.
31. Schupfner R, Kasmann LT, Wagner W, Schulz AP. Complications in Treatment of 31-A Fractures with Trochanteric Gamma Nail (TGN) Versus Gamma3 Nail (G3N) - A Review of 217 Cases. *Open Orthop J.* 2016;10:389-95.
32. Georgiannos D, Lampridis V, Bisbinas I. Complications following Treatment of Trochanteric Fractures with the Gamma3 Nail: Is the Latest Version of Gamma Nail Superior to Its Predecessor? *Surg Res Pract.* 2014;2014:143598.
33. Unger AC, Wilde E, Kienast B, Jürgens C, Schulz AP. Treatment of trochanteric fractures with the gamma3 nail - methodology and early results of a prospective consecutive monitored clinical case series. *Open Orthop J.* 2014;8:466-73.
34. Varela-Egocheaga JR, Iglesias-Colao R, Suarez-Suarez MA, Fernandez-Villan M, Gonzalez-Sastre V, Murcia-Mazon A. Minimally invasive osteosynthesis in stable trochanteric fractures: a comparative study between Gotfried percutaneous compression plate and Gamma 3 intramedullary nail. *Arch Orthop Trauma Surg.* 2009;129(10):1401-7.
35. Schipper IB, Marti RK, van der Werken C. Unstable trochanteric femoral fractures: extramedullary or intramedullary fixation. Review of literature. *Injury.* 2004;35(2):142-51.
36. Queally JM, Harris E, Handoll HH, Parker MJ. Intramedullary nails for extracapsular hip fractures in adults. *Cochrane Database Syst Rev.* 2014(9):CD004961.
37. Ruecker AH, Rupperecht M, Gruber M, Gebauer M, Barvencik F, Briem D, et al. The treatment of intertrochanteric fractures: results using an intramedullary nail with integrated cephalocervical screws and linear compression. *J Orthop Trauma.* 2009;23(1):22-30.



- 1  
2  
3 38. Serrano R, Blair JA, Watson DT, Infante AF, Jr., Shah AR, Mir HR, et al. Cephalomedullary Nail  
4 Fixation of Intertrochanteric Femur Fractures: Are Two Proximal Screws Better Than One? *J Orthop*  
5 *Trauma*. 2017;31(11):577-82.
- 6 39. Zhang C, Xu B, Liang G, Zeng X, Zeng D, Chen D, et al. Optimizing stability in AO/OTA 31-A2  
7 intertrochanteric fracture fixation in older patients with osteoporosis. *J Int Med Res*.  
8 2018;46(5):1767-78.
- 9 40. Seyhan M, Turkmen I, Unay K, Ozkut AT. Do PFNA devices and Intertan nails both have the  
10 same effects in the treatment of trochanteric fractures? A prospective clinical study. *J Orthop Sci*.  
11 2015;20(6):1053-61.
- 12 41. Gavaskar AS, Tummala NC, Srinivasan P, Gopalan H, Karthik B, S S. Helical Blade or the  
13 Integrated Lag Screws: A Matched Pair Analysis of 100 Patients With Unstable Trochanteric  
14 Fractures. *J Orthop Trauma*. 2018;32(6):274-7.
- 15 42. Nüchtern JV, Ruecker AH, Sellenschloh K, Rupprecht M, Püschel K, Rueger JM, et al.  
16 Malpositioning of the Lag Screws by 1- or 2-screw Nailing Systems for Pertrochanteric Femoral  
17 Fractures:  
18  
19 A Biomechanical Comparison of Gamma 3 and Intertan. *J Orthop Trauma*. 2014;28:276-82.
- 20 43. Santoni BG, Nayak AN, Cooper SA, Smithson IR, Cox JL, Marberry ST, et al. Comparison of  
21 Femoral Head Rotation and Varus Collapse Between a Single Lag Screw and Integrated Dual Screw  
22 Intertrochanteric Hip Fracture Fixation Device Using a Cadaveric Hemi-Pelvis Biomechanical Model. *J*  
23 *Orthop Trauma*. 2016;30(4):164-9.
- 24 44. Kubiak EN, Bong M, Park SS, Kummer F, Egol K, Koval KJ. Intramedullary fixation of unstable  
25 intertrochanteric hip fractures: one or two lag screws. *J Orthop Trauma*. 2004;18(1):12-7.
- 26 45. Kouvidis GK, Sommers MB, Giannoudis PV, Katonis PG, Bottlang M. Comparison of migration  
27 behavior between single and dual lag screw implants for intertrochanteric fracture fixation. *J Orthop*  
28 *Surg Res*. 2009;4:16.
- 29 46. Ma JX, Kuang MJ, Fan ZR, Xing F, Zhao YL, Zhang LK, et al. Comparison of clinical outcomes  
30 with InterTan vs Gamma nail or PFNA in the treatment of intertrochanteric fractures: A meta-  
31 analysis. *Sci Rep*. 2017;7(1):15962.
- 32 47. Allen WC, Piotrowski G, Burstein AH, Frankel VH. Biomechanical principles of intramedullary  
33 fixation. *Clin Orthop Relat Res*. 1968;60:13-20.
- 34 48. Kyle RF. Biomechanics of intramedullary fracture fixation. *Orthopedics*. 1985;8(11):1356-9.
- 35 49. Perren SM. Physical and biological aspects of fracture healing with special reference to  
36 internal fixation. *Clin Orthop Relat Res*. 1979(138):175-96.
- 37 50. Fang C, Gudushauri P, Wong T-M, Lau T-W, Pun T, Leung F. Increased Fracture Collapse after  
38 Intertrochanteric Fractures Treated by the Dynamic Hip Screw Adversely Affects Walking Ability but  
39 Not Survival. *BioMed Research International*. 2016;2016:8.
- 40 51. Yoo JH, Kim TY, Chang JD, Kwak YH, Kwon YS. Factors influencing functional outcomes in  
41 united intertrochanteric hip fractures: a negative effect of lag screw sliding. *Orthopedics*.  
42 2014;37(12):e1101-7.
- 43 52. Loch DA, Kyle RF, Bechtold JE, Kane M, Anderson K, Sherman RE. Forces required to initiate  
44 sliding in second-generation intramedullary nails. *J Bone Joint Surg Am*. 1998;80(11):1626-31.
- 45 53. Mahomed MN, Harrington IJ, Hearn TC. Biomechanical analysis of the Medoff sliding plate. *J*  
46 *Trauma*. 2000;48(1):93-100.
- 47 54. Euler E, Betz A, chweiberer L. The treatment of trochanteric and femoral neck fractures  
48 using the dynamic hip screw (DHS). *Orthop Traumatol*. 1992;1(4):246-58.
- 49 55. Choueka J, Koval KJ, Kummer FJ, Crawford G, Zuckerman JD. Biomechanical comparison of  
50 the sliding hip screw and the dome plunger. Effects of material and fixation design. *J Bone Joint Surg*  
51 *Br*. 1995;77(2):277-83.
- 52 56. Dodds SD, Baumgaertner MR. The sliding hip screw. *Current Opinion in Orthopaedics*.  
53 2004;15(1):12-7.
- 54  
55  
56  
57  
58  
59  
60

- 1
- 2
- 3
- 4 57. Zhu Y, Meili S, Zhang C, Luo C, Zeng BF. Is the lag screw sliding effective in the intramedullary
- 5 nailing in A1 and A2 AO-OTA intertrochanteric fractures? A prospective study of Sliding and None-
- 6 sliding lag screw in Gamma-III nail. *Scand J Trauma Resusc Emerg Med.* 2012;20:60.
- 7 58. Trauma S. Gamma3 Trochanteric Nail 170 & 180 Operative Technique. Gamma3
- 8 Trochanteric Nail 170 & 180 Operative Technique. Schönkirchen, Germany: Stryker; 2016. p. 33.
- 9 59. Nephew S. Trigen Intertan Trochanteric Antegrade Nail: Operative Technique. Trigen
- 10 Intertan Trochanteric Antegrade Nail: Operative Technique. Tennessee, USA: Smith & Nephew, Inc.;
- 11 2012. p. 31.
- 12 60. Mavrogenis AF, Panagopoulos GN, Megaloikonomos PD, Igoumenou VG, Galanopoulos I,
- 13 Vottis CT, et al. Complications After Hip Nailing for Fractures. *Orthopedics.* 2016;39(1):e108-16.
- 14 61. Bojan AJ, Beimel C, Taglang G, Collin D, Ekholm C, Jönsson A. Critical factors in cut-out
- 15 complication after Gamma Nail treatment of proximal femoral fractures. *BMC musculoskeletal*
- 16 *disorders.* 2013;14:1-.
- 17 62. Baumgaertner MR, Curtin AL, Lindskog DM, Keggi JM. The Value of the Tip-Apex Distance in
- 18 Predicting Failure of Fixation of Peritrochanteric Fractures of the Hip. *The Journal of Bone and Joint*
- 19 *Surgery.* 1995;77-A(7):p1058-64.
- 20 63. Geller JA, Saifi C, Morrison TA, Macaulay W. Tip-apex distance of intramedullary devices as a
- 21 predictor of cut-out failure in the treatment of peritrochanteric elderly hip fractures. *Int Orthop.*
- 22 2010;34(5):719-22.
- 23 64. De Bruijn K, den Hartog D, Tuinebreijer W, Roukema G. Reliability of predictors for screw
- 24 cutout in intertrochanteric hip fractures. *J Bone Joint Surg Am.* 2012;94(14):1266-72.
- 25 65. Aihara LJ, Nanni RA, Carvalho MS, Zamboni C, Durigan JR, Hungria Neto JS, et al. Late
- 26 postoperative analysis of the tip-apex distance (TAD) in pertrochanteric fractures: is there an
- 27 accommodation of the implant within the bone? *Injury.* 2017;48:S54-S6.
- 28 66. Linacre JM, Heinemann AW, Wright BD, Granger CV, Hamilton BB. The structure and stability
- 29 of the functional independence measure. *Archives of Physical Medicine and Rehabilitation.*
- 30 1994;75(2):127-32.
- 31 67. Ottenbacher KJ, Hsu Y, Granger CV, Fiedler RC. The reliability of the functional independence
- 32 measure: a quantitative review. *Arch Phys Med Rehabil.* 1996;77(12):1226-32.
- 33 68. Hamilton BB, Laughlin JA, Fiedler RC, Granger CV. Interrater reliability of the 7-level
- 34 functional independence measure (FIM). *Scand J Rehabil Med.* 1994;26(3):115-9.
- 35 69. Katz J, Melzack R. Measurement of pain. *Surg Clin North Am.* 1999;79(2):231-52.
- 36 70. Ferreira-Valente MA, Pais-Ribeiro JL, Jensen MP. Validity of four pain intensity rating scales.
- 37 *Pain.* 2011;152(10):2399-404.
- 38 71. Nilsson A, Bremander A. Measures of hip function and symptoms: Harris Hip Score (HHS),
- 39 Hip Disability and Osteoarthritis Outcome Score (HOOS), Oxford Hip Score (OHS), Lequesne Index of
- 40 Severity for Osteoarthritis of the Hip (LISOH), and American Academy of Orthopedic Surgeons
- 41 (AAOS) Hip and Knee Questionnaire. *Arthritis Care & Research.* 2011;63(S11):S200-S7.
- 42 72. Frihagen F, Grotle M, Madsen JE, Wyller TB, Mowinckel P, Nordsletten L. Outcome after
- 43 femoral neck fractures: A comparison of Harris Hip Score, Eq-5d and Barthel Index. *Injury.*
- 44 2008;39(10):1147-56.
- 45 73. Söderman P, Malchau H. Is the Harris Hip Score System Useful to Study the Outcome of Total
- 46 Hip Replacement? 2001. 189-97 p.
- 47 74. Hoeksma HL, Van den Ende CHM, Ronday HK, Heering A, Breedveld FC, Dekker J.
- 48 Comparison of the responsiveness of the Harris Hip Score with generic measures for hip function in
- 49 osteoarthritis of the hip. *Annals of the Rheumatic Diseases.* 2003;62(10):935.
- 50 75. Hopp S, Wirbel R, Ojodu I, Pizanis A, Pohlemann T, Fleischer J. Does the implant make the
- 51 difference ? - Prospective comparison of two different proximal femur nails. *Acta Orthop Belg.*
- 52 2016;82(2):319-31.
- 53
- 54
- 55
- 56
- 57
- 58
- 59
- 60

- 1
- 2
- 3
- 4 76. Berger-Groch J, Rupprecht M, Schoepper S, Schroeder M, Rueger JM, Hoffmann M. Five-Year
- 5 Outcome Analysis of Intertrochanteric Femur Fractures: A Prospective Randomized Trial Comparing
- 6 a 2-Screw and a Single-Screw Cephalomedullary Nail. *J Orthop Trauma*. 2016;30(9):483-8.
- 7 77. Su H, Sun K, Wang X. A randomized prospective comparison of Intertan and Gamma3 for
- 8 treating unstable intertrochanteric fractures. *Int J Clin Exp Med*. 2016;9(5):p8640-7.
- 9 78. Wu D, Ren G, Peng C, Zheng X, Mao F, Zhang Y. InterTan nail versus Gamma3 nail for
- 10 intramedullary nailing of unstable trochanteric fractures. *Diagn Pathol*. 2014;9:191.
- 11 79. Macefield RC, Boulind CE, Blazeby JM. Selecting and measuring optimal outcomes for
- 12 randomised controlled trials in surgery. *Langenbeck's archives of surgery*. 2014;399(3):263-72.
- 13 80. Budair B, Ahmed U, Hodson J, David M, Ashraf M, McBride T. Are we all guilty of under-
- 14 estimating intra-operative blood loss during hip fracture surgery? *Journal of Orthopaedics*.
- 15 2017;14(1):81-4.
- 16 81. Pinto A, Faiz O, Davis R, Almoudaris A, Vincent C. Surgical complications and their impact on
- 17 patients' psychosocial well-being: a systematic review and meta-analysis. *BMJ Open*.
- 18 2016;6(2):e007224.
- 19 82. Lawrence VA, Hilsenbeck SG, Noveck H, Poses RM, Carson JL. Medical complications and
- 20 outcomes after hip fracture repair. *Arch Intern Med*. 2002;162(18):2053-7.
- 21 83. Flikweert ER, Wendt KW, Diercks RL, Izaks GJ, Landsheer D, Stevens M, et al. Complications
- 22 after hip fracture surgery: are they preventable? *European journal of trauma and emergency surgery*
- 23 : official publication of the European Trauma Society. 2018;44(4):573-80.
- 24 84. Kim K-H, Han KY, Kim KW, Lee JH, Chung MK. Local Postoperative Complications after
- 25 Surgery for Intertrochanteric Fractures Using Cephalomedullary Nails. *Hip Pelvis*. 2018;30(3):168-74.
- 26 85. Matre K, Havelin LI, Gjertsen J-E, Espehaug B, Fevang JM. Intramedullary nails result in more
- 27 reoperations than sliding hip screws in two-part intertrochanteric fractures. *Clinical orthopaedics*
- 28 and related research. 2013;471(4):1379-86.
- 29 86. Herman T, Giladi N, Hausdorff JM. Properties of the 'timed up and go' test: more than meets
- 30 the eye. *Gerontology*. 2011;57(3):203-10.
- 31 87. Podsiadlo D, Richardson S. The timed "Up & Go": a test of basic functional mobility for frail
- 32 elderly persons. *J Am Geriatr Soc*. 1991;39(2):142-8.
- 33 88. Bennie S, Bruner K, Dizon A, Fritz H, Goodman B, Peterson S. Measurements of Balance:
- 34 Comparison of the Timed "Up and Go" Test and Functional Reach Test with the Berg Balance Scale.
- 35 *Journal of Physical Therapy Science*. 2003;15(2):93-7.
- 36 89. Freter SH, Fruchter N. Relationship between timed 'up and go' and gait time in an elderly
- 37 orthopaedic rehabilitation population. *Clin Rehabil*. 2000;14(1):96-101.
- 38 90. Bohannon RW. Reference values for the timed up and go test: a descriptive meta-analysis. *J*
- 39 *Geriatr Phys Ther*. 2006;29(2):64-8.
- 40 91. Wu G, Siegler S, Allard P, Kirtley C, Leardini A, Rosenbaum D, et al. ISB recommendation on
- 41 definitions of joint coordinate system of various joints for the reporting of human joint motion—part
- 42 I: ankle, hip, and spine. *Journal of Biomechanics* 2002;35:p543–8.
- 43 92. Tsushima H, Morris ME, McGinley J. Test-retest reliability and inter-tester reliability of
- 44 kinematic data from a three-dimensional gait analysis system. *J Jpn Phys Ther Assoc*. 2003;6(1):9-17.
- 45 93. Delp SL, Anderson FC, Arnold AS, Loan P, Habib A, John CT, et al. OpenSim: open-source
- 46 software to create and analyze dynamic simulations of movement. *IEEE Trans Biomed Eng*.
- 47 2007;54(11):1940-50.
- 48 94. Zhang J, Fernandez J, Hislop-Jambrich J, Besier TF. Lower limb estimation from sparse
- 49 landmarks using an articulated shape model. *J Biomech*. 2016;49(16):3875-81.
- 50 95. Kline Mangione K, Craik RL, Lopopolo R, Tomlinson JD, Brenneman SK. Predictors of gait
- 51 speed in patients after hip fracture. *Physiother Can*. 2008;60(1):10-8.
- 52 96. Dieu O, Mikulovic J, Fardy PS, Bui-Xuan G, Beghin L, Vanhelst J. Physical activity using wrist-
- 53 worn accelerometers: comparison of dominant and non-dominant wrist. *Clin Physiol Funct Imaging*.
- 54 2017;37(5):525-9.
- 55
- 56
- 57
- 58
- 59
- 60

- 1  
2  
3 97. Bojan AJ, Beimel C, Speitling A, Taglang G, Ekholm C, Jonsson A. 3066 consecutive Gamma  
4 Nails. 12 years experience at a single centre. BMC Musculoskelet Disord. 2010;11(1).  
5 98. Hoffmann S, Paetzold R, Stephan D, Puschel K, Buehren V, Augat P. Biomechanical Evaluation  
6 of Interlocking Lag Screw Design in Intramedullary Nailing of Unstable Pertrochanteric Fractures. J  
7 Orthop Trauma. 2013;27(9):483-90.  
8 99. Abram SG, Pollard TC, Andrade AJ. Inadequate 'three-point' proximal fixation predicts failure  
9 of the Gamma nail. The Bone & Joint Journal. 2013;95(6):825-30.  
10  
11  
12  
13  
14  
15  
16  
17  
18  
19  
20  
21  
22  
23  
24  
25  
26  
27  
28  
29  
30  
31  
32  
33  
34  
35  
36  
37  
38  
39  
40  
41  
42  
43  
44  
45  
46  
47  
48  
49  
50  
51  
52  
53  
54  
55  
56  
57  
58  
59  
60

For peer review only

1  
2  
3  
4  
5  
6  
7  
8  
9  
10  
11  
12  
13  
14  
15  
16  
17  
18  
19  
20  
21  
22  
23  
24  
25  
26  
27  
28  
29  
30  
31  
32  
33  
34  
35  
36  
37  
38  
39  
40  
41  
42  
43  
44  
45  
46  
47  
48  
49  
50  
51  
52  
53  
54  
55  
56  
57  
58  
59  
60

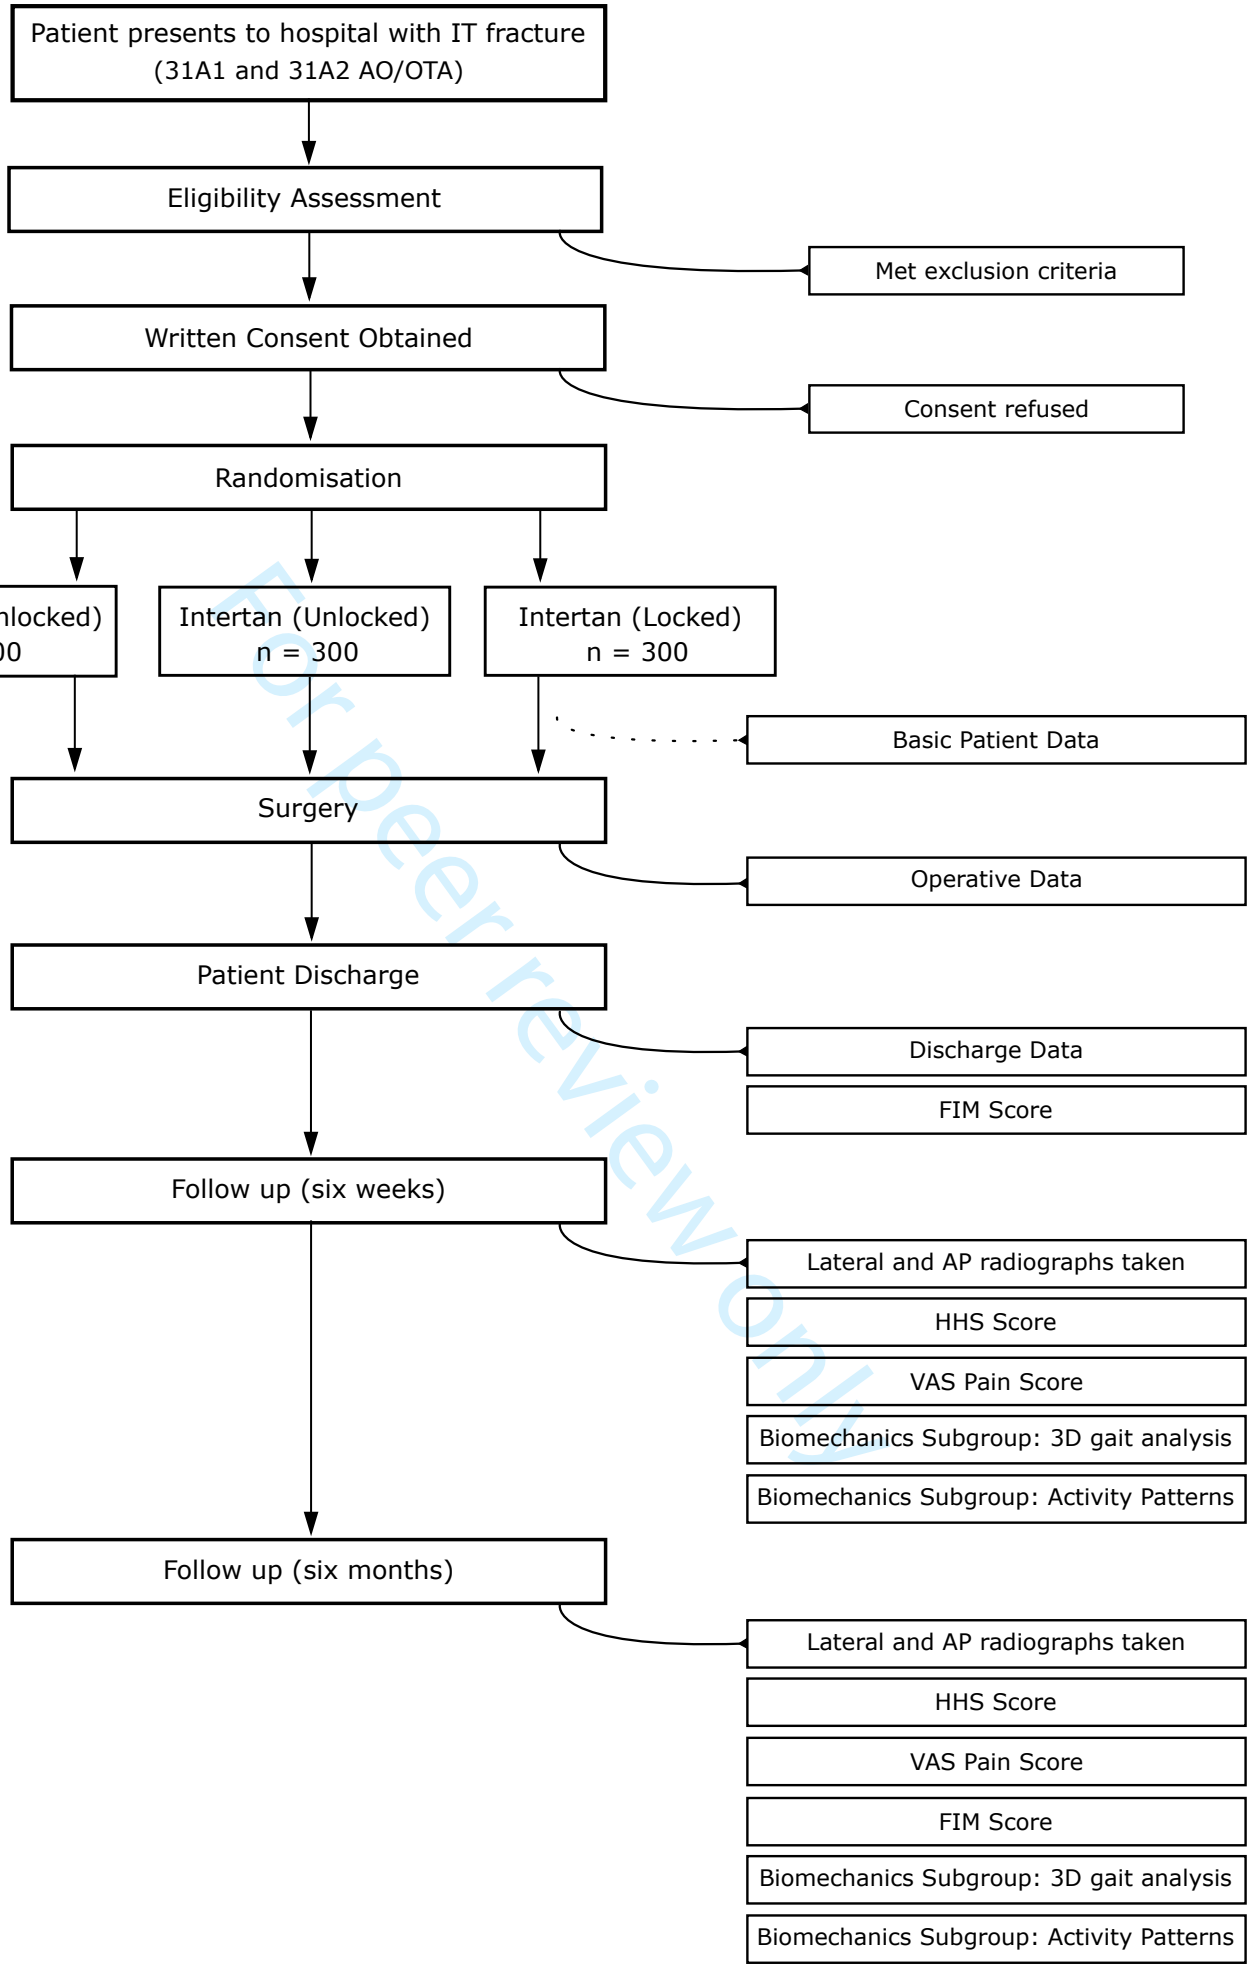

# Reporting checklist for protocol of a clinical trial.

Based on the SPIRIT guidelines.

## Instructions to authors

Complete this checklist by entering the page numbers from your manuscript where readers will find each of the items listed below.

Your article may not currently address all the items on the checklist. Please modify your text to include the missing information. If you are certain that an item does not apply, please write "n/a" and provide a short explanation.

Upload your completed checklist as an extra file when you submit to a journal.

In your methods section, say that you used the SPIRIT reporting guidelines, and cite them as:

Chan A-W, Tetzlaff JM, Altman DG, Laupacis A, Gøtzsche PC, Krleža-Jerić K, Hróbjartsson A, Mann H, Dickersin K, Berlin J, Doré C, Parulekar W, Summerskill W, Groves T, Schulz K, Sox H, Rockhold FW, Rennie D, Moher D. SPIRIT 2013 Statement: Defining standard protocol items for clinical trials. *Ann Intern Med.* 2013;158(3):200-207

|                                   | Reporting Item                                                                                                                  | Page Number |
|-----------------------------------|---------------------------------------------------------------------------------------------------------------------------------|-------------|
| <b>Administrative information</b> |                                                                                                                                 |             |
| Title                             | <a href="#">#1</a> Descriptive title identifying the study design, population, interventions, and, if applicable, trial acronym | 1           |

|    |                     |                     |                                            |    |
|----|---------------------|---------------------|--------------------------------------------|----|
| 1  | Trial registration  | <a href="#">#2a</a> | Trial identifier and registry name. If not | 3  |
| 2  |                     |                     | yet registered, name of intended registry  |    |
| 3  |                     |                     |                                            |    |
| 4  |                     |                     |                                            |    |
| 5  |                     |                     |                                            |    |
| 6  | Trial registration: | <a href="#">#2b</a> | All items from the World Health            | 9  |
| 7  |                     |                     |                                            |    |
| 8  | data set            |                     | Organization Trial Registration Data Set   |    |
| 9  |                     |                     |                                            |    |
| 10 |                     |                     |                                            |    |
| 11 |                     |                     |                                            |    |
| 12 | Protocol version    | <a href="#">#3</a>  | Date and version identifier                | 20 |
| 13 |                     |                     |                                            |    |
| 14 |                     |                     |                                            |    |
| 15 | Funding             | <a href="#">#4</a>  | Sources and types of financial, material,  | 20 |
| 16 |                     |                     | and other support                          |    |
| 17 |                     |                     |                                            |    |
| 18 |                     |                     |                                            |    |
| 19 |                     |                     |                                            |    |
| 20 | Roles and           | <a href="#">#5a</a> | Names, affiliations, and roles of protocol | 20 |
| 21 |                     |                     |                                            |    |
| 22 | responsibilities:   |                     | contributors                               |    |
| 23 |                     |                     |                                            |    |
| 24 | contributorship     |                     |                                            |    |
| 25 |                     |                     |                                            |    |
| 26 |                     |                     |                                            |    |
| 27 |                     |                     |                                            |    |
| 28 | Roles and           | <a href="#">#5b</a> | Name and contact information for the       | 9  |
| 29 |                     |                     |                                            |    |
| 30 | responsibilities:   |                     | trial sponsor                              |    |
| 31 |                     |                     |                                            |    |
| 32 | sponsor contact     |                     |                                            |    |
| 33 |                     |                     |                                            |    |
| 34 | information         |                     |                                            |    |
| 35 |                     |                     |                                            |    |
| 36 |                     |                     |                                            |    |
| 37 |                     |                     |                                            |    |
| 38 | Roles and           | <a href="#">#5c</a> | Role of study sponsor and funders, if      | 20 |
| 39 |                     |                     |                                            |    |
| 40 | responsibilities:   |                     | any, in study design; collection,          |    |
| 41 |                     |                     | management, analysis, and                  |    |
| 42 | sponsor and         |                     | interpretation of data; writing of the     |    |
| 43 |                     |                     | report; and the decision to submit the     |    |
| 44 | funder              |                     | report for publication, including whether  |    |
| 45 |                     |                     | they will have ultimate authority over     |    |
| 46 |                     |                     | any of these activities                    |    |
| 47 |                     |                     |                                            |    |
| 48 |                     |                     |                                            |    |
| 49 |                     |                     |                                            |    |
| 50 |                     |                     |                                            |    |
| 51 |                     |                     |                                            |    |
| 52 |                     |                     |                                            |    |
| 53 |                     |                     |                                            |    |
| 54 |                     |                     |                                            |    |
| 55 |                     |                     |                                            |    |
| 56 |                     |                     |                                            |    |
| 57 |                     |                     |                                            |    |
| 58 |                     |                     |                                            |    |
| 59 |                     |                     |                                            |    |
| 60 |                     |                     |                                            |    |

|    |                     |                     |                                             |       |
|----|---------------------|---------------------|---------------------------------------------|-------|
| 1  | Roles and           | <a href="#">#5d</a> | Composition, roles, and responsibilities    | 19,20 |
| 2  |                     |                     |                                             |       |
| 3  | responsibilities:   |                     | of the coordinating centre, steering        |       |
| 4  |                     |                     | committee, endpoint adjudication            |       |
| 5  | committees          |                     | committee, data management team,            |       |
| 6  |                     |                     | and other individuals or groups             |       |
| 7  |                     |                     | overseeing the trial, if applicable (see    |       |
| 8  |                     |                     | Item 21a for data monitoring committee)     |       |
| 9  |                     |                     |                                             |       |
| 10 |                     |                     |                                             |       |
| 11 |                     |                     |                                             |       |
| 12 |                     |                     |                                             |       |
| 13 |                     |                     |                                             |       |
| 14 |                     |                     |                                             |       |
| 15 |                     |                     |                                             |       |
| 16 |                     |                     |                                             |       |
| 17 |                     |                     |                                             |       |
| 18 | <b>Introduction</b> |                     |                                             |       |
| 19 |                     |                     |                                             |       |
| 20 |                     |                     |                                             |       |
| 21 | Background and      | <a href="#">#6a</a> | Description of research question and        | 4     |
| 22 |                     |                     | justification for undertaking the trial,    |       |
| 23 | rationale           |                     | including summary of relevant studies       |       |
| 24 |                     |                     | (published and unpublished) examining       |       |
| 25 |                     |                     | benefits and harms for each intervention    |       |
| 26 |                     |                     |                                             |       |
| 27 |                     |                     |                                             |       |
| 28 |                     |                     |                                             |       |
| 29 |                     |                     |                                             |       |
| 30 |                     |                     |                                             |       |
| 31 |                     |                     |                                             |       |
| 32 |                     |                     |                                             |       |
| 33 | Background and      | <a href="#">#6b</a> | Explanation for choice of comparators       | 6     |
| 34 |                     |                     |                                             |       |
| 35 | rationale: choice   |                     |                                             |       |
| 36 |                     |                     |                                             |       |
| 37 | of comparators      |                     |                                             |       |
| 38 |                     |                     |                                             |       |
| 39 |                     |                     |                                             |       |
| 40 |                     |                     |                                             |       |
| 41 | Objectives          | <a href="#">#7</a>  | Specific objectives or hypotheses           | 7     |
| 42 |                     |                     |                                             |       |
| 43 |                     |                     |                                             |       |
| 44 | Trial design        | <a href="#">#8</a>  | Description of trial design including type  | 8     |
| 45 |                     |                     | of trial (eg, parallel group, crossover,    |       |
| 46 |                     |                     | factorial, single group), allocation ratio, |       |
| 47 |                     |                     | and framework (eg, superiority,             |       |
| 48 |                     |                     | equivalence, non-inferiority, exploratory)  |       |
| 49 |                     |                     |                                             |       |
| 50 |                     |                     |                                             |       |
| 51 |                     |                     |                                             |       |
| 52 |                     |                     |                                             |       |
| 53 |                     |                     |                                             |       |
| 54 |                     |                     |                                             |       |
| 55 |                     |                     |                                             |       |
| 56 |                     |                     |                                             |       |
| 57 |                     |                     |                                             |       |
| 58 |                     |                     |                                             |       |
| 59 |                     |                     |                                             |       |
| 60 |                     |                     |                                             |       |



1 **Methods:**

2  
3 **Participants,**  
4  
5 **interventions, and**  
6  
7 **outcomes**  
8  
9

|    |                      |                      |                                            |       |
|----|----------------------|----------------------|--------------------------------------------|-------|
| 10 |                      |                      |                                            |       |
| 11 | Study setting        | <a href="#">#9</a>   | Description of study settings (eg,         | 8     |
| 12 |                      |                      | community clinic, academic hospital)       |       |
| 13 |                      |                      | and list of countries where data will be   |       |
| 14 |                      |                      | collected. Reference to where list of      |       |
| 15 |                      |                      | study sites can be obtained                |       |
| 16 |                      |                      |                                            |       |
| 17 |                      |                      |                                            |       |
| 18 |                      |                      |                                            |       |
| 19 |                      |                      |                                            |       |
| 20 |                      |                      |                                            |       |
| 21 |                      |                      |                                            |       |
| 22 |                      |                      |                                            |       |
| 23 | Eligibility criteria | <a href="#">#10</a>  | Inclusion and exclusion criteria for       | 10    |
| 24 |                      |                      | participants. If applicable, eligibility   |       |
| 25 |                      |                      | criteria for study centres and individuals |       |
| 26 |                      |                      | who will perform the interventions (eg,    |       |
| 27 |                      |                      | surgeons, psychotherapists)                |       |
| 28 |                      |                      |                                            |       |
| 29 |                      |                      |                                            |       |
| 30 |                      |                      |                                            |       |
| 31 |                      |                      |                                            |       |
| 32 |                      |                      |                                            |       |
| 33 |                      |                      |                                            |       |
| 34 |                      |                      |                                            |       |
| 35 | Interventions:       | <a href="#">#11a</a> | Interventions for each group with          | 11,12 |
| 36 |                      |                      | sufficient detail to allow replication,    |       |
| 37 | description          |                      | including how and when they will be        |       |
| 38 |                      |                      | administered                               |       |
| 39 |                      |                      |                                            |       |
| 40 |                      |                      |                                            |       |
| 41 |                      |                      |                                            |       |
| 42 |                      |                      |                                            |       |
| 43 |                      |                      |                                            |       |
| 44 |                      |                      |                                            |       |
| 45 | Interventions:       | <a href="#">#11b</a> | Criteria for discontinuing or modifying    | 12    |
| 46 |                      |                      | allocated interventions for a given trial  |       |
| 47 | modifications        |                      | participant (eg, drug dose change in       |       |
| 48 |                      |                      | response to harms, participant request,    |       |
| 49 |                      |                      | or improving / worsening disease)          |       |
| 50 |                      |                      |                                            |       |
| 51 |                      |                      |                                            |       |
| 52 |                      |                      |                                            |       |
| 53 |                      |                      |                                            |       |
| 54 |                      |                      |                                            |       |
| 55 |                      |                      |                                            |       |
| 56 |                      |                      |                                            |       |
| 57 |                      |                      |                                            |       |
| 58 |                      |                      |                                            |       |
| 59 |                      |                      |                                            |       |
| 60 |                      |                      |                                            |       |

|                                                                                                                                                    |                                    |                                                                                                                                                                                                                                                                                                                                                                                                    |       |
|----------------------------------------------------------------------------------------------------------------------------------------------------|------------------------------------|----------------------------------------------------------------------------------------------------------------------------------------------------------------------------------------------------------------------------------------------------------------------------------------------------------------------------------------------------------------------------------------------------|-------|
| 1<br>2<br>3<br>4<br>5<br>6<br>7<br>8<br>9<br>10                                                                                                    | Interventions:<br>adherence        | <a href="#">#11c</a> Strategies to improve adherence to intervention protocols, and any procedures for monitoring adherence (eg, drug tablet return; laboratory tests)                                                                                                                                                                                                                             | 10,11 |
| 11<br>12<br>13<br>14<br>15<br>16<br>17<br>18                                                                                                       | Interventions:<br>concomitant care | <a href="#">#11d</a> Relevant concomitant care and interventions that are permitted or prohibited during the trial                                                                                                                                                                                                                                                                                 | 11    |
| 19<br>20<br>21<br>22<br>23<br>24<br>25<br>26<br>27<br>28<br>29<br>30<br>31<br>32<br>33<br>34<br>35<br>36<br>37<br>38<br>39<br>40<br>41<br>42<br>43 | Outcomes                           | <a href="#">#12</a> Primary, secondary, and other outcomes, including the specific measurement variable (eg, systolic blood pressure), analysis metric (eg, change from baseline, final value, time to event), method of aggregation (eg, median, proportion), and time point for each outcome. Explanation of the clinical relevance of chosen efficacy and harm outcomes is strongly recommended | 14-17 |
| 44<br>45<br>46<br>47<br>48<br>49<br>50<br>51<br>52<br>53<br>54<br>55<br>56<br>57<br>58<br>59<br>60                                                 | Participant<br>timeline            | <a href="#">#13</a> Time schedule of enrolment, interventions (including any run-ins and washouts), assessments, and visits for participants. A schematic diagram is highly recommended (see Figure)                                                                                                                                                                                               | 11-13 |

|    |                           |                      |                                              |    |
|----|---------------------------|----------------------|----------------------------------------------|----|
| 1  | Sample size               | <a href="#">#14</a>  | Estimated number of participants             | 18 |
| 2  |                           |                      |                                              |    |
| 3  |                           |                      | needed to achieve study objectives and       |    |
| 4  |                           |                      | how it was determined, including clinical    |    |
| 5  |                           |                      | and statistical assumptions supporting       |    |
| 6  |                           |                      | any sample size calculations                 |    |
| 7  |                           |                      |                                              |    |
| 8  |                           |                      |                                              |    |
| 9  |                           |                      |                                              |    |
| 10 |                           |                      |                                              |    |
| 11 |                           |                      |                                              |    |
| 12 |                           |                      |                                              |    |
| 13 | Recruitment               | <a href="#">#15</a>  | Strategies for achieving adequate            | 8  |
| 14 |                           |                      | participant enrolment to reach target        |    |
| 15 |                           |                      | sample size                                  |    |
| 16 |                           |                      |                                              |    |
| 17 |                           |                      |                                              |    |
| 18 |                           |                      |                                              |    |
| 19 |                           |                      |                                              |    |
| 20 |                           |                      |                                              |    |
| 21 | <b>Methods:</b>           |                      |                                              |    |
| 22 |                           |                      |                                              |    |
| 23 | <b>Assignment of</b>      |                      |                                              |    |
| 24 | <b>interventions (for</b> |                      |                                              |    |
| 25 | <b>controlled trials)</b> |                      |                                              |    |
| 26 |                           |                      |                                              |    |
| 27 |                           |                      |                                              |    |
| 28 |                           |                      |                                              |    |
| 29 |                           |                      |                                              |    |
| 30 |                           |                      |                                              |    |
| 31 | Allocation:               | <a href="#">#16a</a> | Method of generating the allocation          | 10 |
| 32 | sequence                  |                      | sequence (eg, computer-generated             |    |
| 33 | generation                |                      | random numbers), and list of any factors     |    |
| 34 |                           |                      | for stratification. To reduce predictability |    |
| 35 |                           |                      | of a random sequence, details of any         |    |
| 36 |                           |                      | planned restriction (eg, blocking) should    |    |
| 37 |                           |                      | be provided in a separate document that      |    |
| 38 |                           |                      | is unavailable to those who enrol            |    |
| 39 |                           |                      | participants or assign interventions         |    |
| 40 |                           |                      |                                              |    |
| 41 |                           |                      |                                              |    |
| 42 |                           |                      |                                              |    |
| 43 |                           |                      |                                              |    |
| 44 |                           |                      |                                              |    |
| 45 |                           |                      |                                              |    |
| 46 |                           |                      |                                              |    |
| 47 |                           |                      |                                              |    |
| 48 |                           |                      |                                              |    |
| 49 |                           |                      |                                              |    |
| 50 |                           |                      |                                              |    |
| 51 |                           |                      |                                              |    |
| 52 | Allocation                | <a href="#">#16b</a> | Mechanism of implementing the                | 10 |
| 53 | concealment               |                      | allocation sequence (eg, central             |    |
| 54 | mechanism                 |                      | telephone; sequentially numbered,            |    |
| 55 |                           |                      |                                              |    |
| 56 |                           |                      |                                              |    |
| 57 |                           |                      |                                              |    |
| 58 |                           |                      |                                              |    |
| 59 |                           |                      |                                              |    |
| 60 |                           |                      |                                              |    |

opaque, sealed envelopes), describing  
any steps to conceal the sequence until  
interventions are assigned

|                                                                                  |                                                   |                      |                                                                                                                                                               |                                                                                                                                                                            |
|----------------------------------------------------------------------------------|---------------------------------------------------|----------------------|---------------------------------------------------------------------------------------------------------------------------------------------------------------|----------------------------------------------------------------------------------------------------------------------------------------------------------------------------|
| 8<br>9<br>10<br>11<br>12<br>13<br>14<br>15<br>16<br>17                           | Allocation:<br>implementation                     | <a href="#">#16c</a> | Who will generate the allocation<br>sequence, who will enrol participants,<br>and who will assign participants to<br>interventions                            | 10                                                                                                                                                                         |
| 18<br>19<br>20<br>21<br>22<br>23<br>24<br>25<br>26<br>27                         | Blinding (masking)                                | <a href="#">#17a</a> | Who will be blinded after assignment to<br>interventions (eg, trial participants, care<br>providers, outcome assessors, data<br>analysts), and how            | 10                                                                                                                                                                         |
| 28<br>29<br>30<br>31<br>32<br>33<br>34<br>35<br>36<br>37<br>38<br>39<br>40<br>41 | Blinding<br>(masking):<br>emergency<br>unblinding | <a href="#">#17b</a> | If blinded, circumstances under which<br>unblinding is permissible, and procedure<br>for revealing a participant's allocated<br>intervention during the trial | n/a the appropriate medical<br>staff are unblinded to the<br>allocation and in the event of<br>medical complications, the<br>device type will be known by<br>medical staff |

**Methods: Data  
collection,  
management, and  
analysis**

|                                                    |                         |                      |                                                                                                                          |             |
|----------------------------------------------------|-------------------------|----------------------|--------------------------------------------------------------------------------------------------------------------------|-------------|
| 52<br>53<br>54<br>55<br>56<br>57<br>58<br>59<br>60 | Data collection<br>plan | <a href="#">#18a</a> | Plans for assessment and collection of<br>outcome, baseline, and other trial data,<br>including any related processes to | 11,12,14-18 |
|----------------------------------------------------|-------------------------|----------------------|--------------------------------------------------------------------------------------------------------------------------|-------------|

|    |                 |                                                             |       |
|----|-----------------|-------------------------------------------------------------|-------|
| 1  |                 | promote data quality (eg, duplicate                         |       |
| 2  |                 | measurements, training of assessors)                        |       |
| 3  |                 | and a description of study instruments                      |       |
| 4  |                 | (eg, questionnaires, laboratory tests)                      |       |
| 5  |                 | along with their reliability and validity, if               |       |
| 6  |                 | known. Reference to where data                              |       |
| 7  |                 | collection forms can be found, if not in                    |       |
| 8  |                 | the protocol                                                |       |
| 9  |                 |                                                             |       |
| 10 |                 |                                                             |       |
| 11 |                 |                                                             |       |
| 12 |                 |                                                             |       |
| 13 |                 |                                                             |       |
| 14 |                 |                                                             |       |
| 15 |                 |                                                             |       |
| 16 |                 |                                                             |       |
| 17 |                 |                                                             |       |
| 18 |                 |                                                             |       |
| 19 | Data collection | <a href="#">#18b</a> Plans to promote participant retention | 12,13 |
| 20 |                 |                                                             |       |
| 21 | plan: retention | and complete follow-up, including list of                   |       |
| 22 |                 | any outcome data to be collected for                        |       |
| 23 |                 | participants who discontinue or deviate                     |       |
| 24 |                 | from intervention protocols                                 |       |
| 25 |                 |                                                             |       |
| 26 |                 |                                                             |       |
| 27 |                 |                                                             |       |
| 28 |                 |                                                             |       |
| 29 |                 |                                                             |       |
| 30 |                 |                                                             |       |
| 31 | Data management | <a href="#">#19</a> Plans for data entry, coding, security, | 18    |
| 32 |                 | and storage, including any related                          |       |
| 33 |                 | processes to promote data quality (eg,                      |       |
| 34 |                 | double data entry; range checks for data                    |       |
| 35 |                 | values). Reference to where details of                      |       |
| 36 |                 | data management procedures can be                           |       |
| 37 |                 | found, if not in the protocol                               |       |
| 38 |                 |                                                             |       |
| 39 |                 |                                                             |       |
| 40 |                 |                                                             |       |
| 41 |                 |                                                             |       |
| 42 |                 |                                                             |       |
| 43 |                 |                                                             |       |
| 44 |                 |                                                             |       |
| 45 |                 |                                                             |       |
| 46 |                 |                                                             |       |
| 47 |                 |                                                             |       |
| 48 | Statistics:     | <a href="#">#20a</a> Statistical methods for analysing      | 18,19 |
| 49 |                 |                                                             |       |
| 50 | outcomes        | primary and secondary outcomes.                             |       |
| 51 |                 |                                                             |       |
| 52 |                 | Reference to where other details of the                     |       |
| 53 |                 | statistical analysis plan can be found, if                  |       |
| 54 |                 | not in the protocol                                         |       |
| 55 |                 |                                                             |       |
| 56 |                 |                                                             |       |
| 57 |                 |                                                             |       |
| 58 |                 |                                                             |       |
| 59 |                 |                                                             |       |
| 60 |                 |                                                             |       |

|    |                      |                      |                                            |                               |
|----|----------------------|----------------------|--------------------------------------------|-------------------------------|
| 1  | Statistics:          | <a href="#">#20b</a> | Methods for any additional analyses        | 19                            |
| 2  |                      |                      |                                            |                               |
| 3  | additional           |                      | (eg, subgroup and adjusted analyses)       |                               |
| 4  |                      |                      |                                            |                               |
| 5  | analyses             |                      |                                            |                               |
| 6  |                      |                      |                                            |                               |
| 7  |                      |                      |                                            |                               |
| 8  |                      |                      |                                            |                               |
| 9  | Statistics: analysis | <a href="#">#20c</a> | Definition of analysis population relating | 19                            |
| 10 |                      |                      |                                            |                               |
| 11 | population and       |                      | to protocol non-adherence (eg, as          |                               |
| 12 |                      |                      |                                            |                               |
| 13 | missing data         |                      | randomised analysis), and any              |                               |
| 14 |                      |                      |                                            |                               |
| 15 |                      |                      | statistical methods to handle missing      |                               |
| 16 |                      |                      |                                            |                               |
| 17 |                      |                      | data (eg, multiple imputation)             |                               |
| 18 |                      |                      |                                            |                               |
| 19 |                      |                      |                                            |                               |
| 20 |                      |                      |                                            |                               |
| 21 | <b>Methods:</b>      |                      |                                            |                               |
| 22 |                      |                      |                                            |                               |
| 23 | <b>Monitoring</b>    |                      |                                            |                               |
| 24 |                      |                      |                                            |                               |
| 25 |                      |                      |                                            |                               |
| 26 | Data monitoring:     | <a href="#">#21a</a> | Composition of data monitoring             | 20                            |
| 27 |                      |                      |                                            |                               |
| 28 | formal committee     |                      | committee (DMC); summary of its role       |                               |
| 29 |                      |                      |                                            |                               |
| 30 |                      |                      | and reporting structure; statement of      |                               |
| 31 |                      |                      |                                            |                               |
| 32 |                      |                      | whether it is independent from the         |                               |
| 33 |                      |                      |                                            |                               |
| 34 |                      |                      | sponsor and competing interests; and       |                               |
| 35 |                      |                      |                                            |                               |
| 36 |                      |                      | reference to where further details about   |                               |
| 37 |                      |                      |                                            |                               |
| 38 |                      |                      | its charter can be found, if not in the    |                               |
| 39 |                      |                      |                                            |                               |
| 40 |                      |                      | protocol. Alternatively, an explanation of |                               |
| 41 |                      |                      |                                            |                               |
| 42 |                      |                      | why a DMC is not needed                    |                               |
| 43 |                      |                      |                                            |                               |
| 44 |                      |                      |                                            |                               |
| 45 |                      |                      |                                            |                               |
| 46 |                      |                      |                                            |                               |
| 47 |                      |                      |                                            |                               |
| 48 | Data monitoring:     | <a href="#">#21b</a> | Description of any interim analyses and    | n/a trial will continue until |
| 49 |                      |                      |                                            |                               |
| 50 | interim analysis     |                      | stopping guidelines, including who will    | 900 patients are recruited    |
| 51 |                      |                      |                                            |                               |
| 52 |                      |                      | have access to these interim results and   |                               |
| 53 |                      |                      |                                            |                               |
| 54 |                      |                      | make the final decision to terminate the   |                               |
| 55 |                      |                      |                                            |                               |
| 56 |                      |                      | trial                                      |                               |
| 57 |                      |                      |                                            |                               |
| 58 |                      |                      |                                            |                               |
| 59 |                      |                      |                                            |                               |
| 60 |                      |                      |                                            |                               |

|    |                             |                      |                                               |                            |
|----|-----------------------------|----------------------|-----------------------------------------------|----------------------------|
| 1  | Harms                       | <a href="#">#22</a>  | Plans for collecting, assessing,              | n/a in this trial, adverse |
| 2  |                             |                      | reporting, and managing solicited and         | events and harms are       |
| 3  |                             |                      | spontaneously reported adverse events         | collected as complication  |
| 4  |                             |                      | and other unintended effects of trial         | information. This is       |
| 5  |                             |                      | interventions or trial conduct                | described under secondary  |
| 6  |                             |                      |                                               | outcomes.                  |
| 7  |                             |                      |                                               |                            |
| 8  |                             |                      |                                               |                            |
| 9  |                             |                      |                                               |                            |
| 10 |                             |                      |                                               |                            |
| 11 |                             |                      |                                               |                            |
| 12 |                             |                      |                                               |                            |
| 13 |                             |                      |                                               |                            |
| 14 |                             |                      |                                               |                            |
| 15 | Auditing                    | <a href="#">#23</a>  | Frequency and procedures for auditing         | 20                         |
| 16 |                             |                      | trial conduct, if any, and whether the        |                            |
| 17 |                             |                      | process will be independent from              |                            |
| 18 |                             |                      | investigators and the sponsor                 |                            |
| 19 |                             |                      |                                               |                            |
| 20 |                             |                      |                                               |                            |
| 21 |                             |                      |                                               |                            |
| 22 |                             |                      |                                               |                            |
| 23 |                             |                      |                                               |                            |
| 24 |                             |                      |                                               |                            |
| 25 | Ethics and<br>dissemination |                      |                                               |                            |
| 26 |                             |                      |                                               |                            |
| 27 |                             |                      |                                               |                            |
| 28 |                             |                      |                                               |                            |
| 29 |                             |                      |                                               |                            |
| 30 |                             |                      |                                               |                            |
| 31 | Research ethics<br>approval | <a href="#">#24</a>  | Plans for seeking research ethics             | 20                         |
| 32 |                             |                      | committee / institutional review board        |                            |
| 33 |                             |                      | (REC / IRB) approval                          |                            |
| 34 |                             |                      |                                               |                            |
| 35 |                             |                      |                                               |                            |
| 36 |                             |                      |                                               |                            |
| 37 |                             |                      |                                               |                            |
| 38 | Protocol<br>amendments      | <a href="#">#25</a>  | Plans for communicating important             | 20                         |
| 39 |                             |                      | protocol modifications (eg, changes to        |                            |
| 40 |                             |                      | eligibility criteria, outcomes, analyses) to  |                            |
| 41 |                             |                      | relevant parties (eg, investigators, REC      |                            |
| 42 |                             |                      | / IRBs, trial participants, trial registries, |                            |
| 43 |                             |                      | journals, regulators)                         |                            |
| 44 |                             |                      |                                               |                            |
| 45 |                             |                      |                                               |                            |
| 46 |                             |                      |                                               |                            |
| 47 |                             |                      |                                               |                            |
| 48 |                             |                      |                                               |                            |
| 49 |                             |                      |                                               |                            |
| 50 |                             |                      |                                               |                            |
| 51 |                             |                      |                                               |                            |
| 52 |                             |                      |                                               |                            |
| 53 | Consent or assent           | <a href="#">#26a</a> | Who will obtain informed consent or           | 10                         |
| 54 |                             |                      | assent from potential trial participants or   |                            |
| 55 |                             |                      |                                               |                            |
| 56 |                             |                      |                                               |                            |
| 57 |                             |                      |                                               |                            |
| 58 |                             |                      |                                               |                            |
| 59 |                             |                      |                                               |                            |
| 60 |                             |                      |                                               |                            |

|    |                    |                                                                 |                                |
|----|--------------------|-----------------------------------------------------------------|--------------------------------|
| 1  |                    | authorised surrogates, and how (see                             |                                |
| 2  |                    | Item 32)                                                        |                                |
| 3  |                    |                                                                 |                                |
| 4  |                    |                                                                 |                                |
| 5  |                    |                                                                 |                                |
| 6  | Consent or         | <a href="#">#26b</a> Additional consent provisions for          | n/a patients will be           |
| 7  |                    |                                                                 |                                |
| 8  | assent: ancillary  | collection and use of participant data                          | consented for the trial and    |
| 9  |                    |                                                                 |                                |
| 10 | studies            | and biological specimens in ancillary                           | informed that the data will be |
| 11 |                    | studies, if applicable                                          | used for medical research.     |
| 12 |                    |                                                                 |                                |
| 13 |                    |                                                                 |                                |
| 14 |                    |                                                                 |                                |
| 15 | Confidentiality    | <a href="#">#27</a> How personal information about              | n/a all information collected  |
| 16 |                    | potential and enrolled participants will                        | is described in the protocol.  |
| 17 |                    |                                                                 |                                |
| 18 |                    | be collected, shared, and maintained in                         | See pg 11, 12-17               |
| 19 |                    |                                                                 |                                |
| 20 |                    | order to protect confidentiality before,                        |                                |
| 21 |                    | during, and after the trial                                     |                                |
| 22 |                    |                                                                 |                                |
| 23 |                    |                                                                 |                                |
| 24 |                    |                                                                 |                                |
| 25 |                    |                                                                 |                                |
| 26 |                    |                                                                 |                                |
| 27 |                    |                                                                 |                                |
| 28 | Declaration of     | <a href="#">#28</a> Financial and other competing interests     | 20                             |
| 29 |                    |                                                                 |                                |
| 30 | interests          | for principal investigators for the overall                     |                                |
| 31 |                    | trial and each study site                                       |                                |
| 32 |                    |                                                                 |                                |
| 33 |                    |                                                                 |                                |
| 34 |                    |                                                                 |                                |
| 35 | Data access        | <a href="#">#29</a> Statement of who will have access to        | 18                             |
| 36 |                    |                                                                 |                                |
| 37 |                    | the final trial dataset, and disclosure of                      |                                |
| 38 |                    | contractual agreements that limit such                          |                                |
| 39 |                    | access for investigators                                        |                                |
| 40 |                    |                                                                 |                                |
| 41 |                    |                                                                 |                                |
| 42 |                    |                                                                 |                                |
| 43 |                    |                                                                 |                                |
| 44 |                    |                                                                 |                                |
| 45 | Ancillary and post | <a href="#">#30</a> Provisions, if any, for ancillary and post- | n/a both devices used in this  |
| 46 |                    |                                                                 |                                |
| 47 | trial care         | trial care, and for compensation to those                       | trial are FDA approved and     |
| 48 |                    |                                                                 |                                |
| 49 |                    | who suffer harm from trial participation                        | widely used devices.           |
| 50 |                    |                                                                 |                                |
| 51 |                    |                                                                 |                                |
| 52 |                    |                                                                 | Patients presenting with       |
| 53 |                    |                                                                 |                                |
| 54 |                    |                                                                 | medical complications will be  |
| 55 |                    |                                                                 |                                |
| 56 |                    |                                                                 | managed as standard            |
| 57 |                    |                                                                 |                                |
| 58 |                    |                                                                 |                                |
| 59 |                    |                                                                 |                                |
| 60 |                    |                                                                 |                                |



procedure at the site

patients present to.

|    |                       |                      |                                            |                              |
|----|-----------------------|----------------------|--------------------------------------------|------------------------------|
| 1  |                       |                      |                                            |                              |
| 2  |                       |                      |                                            |                              |
| 3  |                       |                      |                                            |                              |
| 4  |                       |                      |                                            |                              |
| 5  |                       |                      |                                            |                              |
| 6  | Dissemination         | <a href="#">#31a</a> | Plans for investigators and sponsor to     | 3                            |
| 7  |                       |                      |                                            |                              |
| 8  | policy: trial results |                      | communicate trial results to participants, |                              |
| 9  |                       |                      |                                            |                              |
| 10 |                       |                      | healthcare professionals, the public, and  |                              |
| 11 |                       |                      |                                            |                              |
| 12 |                       |                      | other relevant groups (eg, via             |                              |
| 13 |                       |                      |                                            |                              |
| 14 |                       |                      | publication, reporting in results          |                              |
| 15 |                       |                      |                                            |                              |
| 16 |                       |                      | databases, or other data sharing           |                              |
| 17 |                       |                      |                                            |                              |
| 18 |                       |                      | arrangements), including any               |                              |
| 19 |                       |                      |                                            |                              |
| 20 |                       |                      | publication restrictions                   |                              |
| 21 |                       |                      |                                            |                              |
| 22 |                       |                      |                                            |                              |
| 23 |                       |                      |                                            |                              |
| 24 |                       |                      |                                            |                              |
| 25 | Dissemination         | <a href="#">#31b</a> | Authorship eligibility guidelines and any  | 20                           |
| 26 |                       |                      |                                            |                              |
| 27 | policy: authorship    |                      | intended use of professional writers       |                              |
| 28 |                       |                      |                                            |                              |
| 29 |                       |                      |                                            |                              |
| 30 | Dissemination         | <a href="#">#31c</a> | Plans, if any, for granting public access  | n/a No plans for participant |
| 31 |                       |                      |                                            |                              |
| 32 | policy:               |                      | to the full protocol, participant-level    | level data to be made        |
| 33 |                       |                      |                                            |                              |
| 34 | reproducible          |                      | dataset, and statistical code              | publically available         |
| 35 |                       |                      |                                            |                              |
| 36 |                       |                      |                                            |                              |
| 37 | research              |                      |                                            |                              |
| 38 |                       |                      |                                            |                              |
| 39 |                       |                      |                                            |                              |
| 40 | <b>Appendices</b>     |                      |                                            |                              |
| 41 |                       |                      |                                            |                              |
| 42 |                       |                      |                                            |                              |
| 43 | Informed consent      | <a href="#">#32</a>  | Model consent form and other related       | Model consent forms will be  |
| 44 |                       |                      |                                            |                              |
| 45 | materials             |                      | documentation given to participants and    | uploaded as additional       |
| 46 |                       |                      |                                            |                              |
| 47 |                       |                      | authorised surrogates                      | document                     |
| 48 |                       |                      |                                            |                              |
| 49 |                       |                      |                                            |                              |
| 50 |                       |                      |                                            |                              |
| 51 | Biological            | <a href="#">#33</a>  | Plans for collection, laboratory           | n/a                          |
| 52 |                       |                      |                                            |                              |
| 53 | specimens             |                      | evaluation, and storage of biological      |                              |
| 54 |                       |                      |                                            |                              |
| 55 |                       |                      | specimens for genetic or molecular         |                              |
| 56 |                       |                      |                                            |                              |
| 57 |                       |                      |                                            |                              |
| 58 |                       |                      |                                            |                              |
| 59 |                       |                      |                                            |                              |
| 60 |                       |                      |                                            |                              |

1 analysis in the current trial and for future

2 use in ancillary studies, if applicable

3  
4  
5  
6 Notes:

- 7  
8
- 9 • 17b: n/a the appropriate medical staff are unblinded to the allocation and in the event of medical  
10 complications, the device type will be known by medical staff
  - 11  
12
  - 13 • 18a: 11,12,14-18
  - 14  
15
  - 16 • 21b: n/a trial will continue until 900 patients are recruited
  - 17  
18
  - 19 • 22: n/a in this trial, adverse events and harms are collected as complication information. This is  
20 described under secondary outcomes.
  - 21  
22
  - 23 • 26b: n/a patients will be consented for the trial and informed that the data will be used for medical  
24 research.
  - 25  
26
  - 27 • 27: n/a all information collected is described in the protocol. See pg 11, 12-17
  - 28  
29
  - 30 • 30: n/a both devices used in this trial are FDA approved and widely used devices. Patients  
31 presenting with medical complications will be managed as standard procedure at the site patients  
32 present to.
  - 33  
34
  - 35 • 31c: n/a No plans for participant level data to be made publically available
  - 36  
37
  - 38 • 32: Model consent forms will be uploaded as additional document The SPIRIT checklist is  
39 distributed under the terms of the Creative Commons Attribution License CC-BY-ND 3.0. This  
40 checklist was completed on 26. June 2019 using <https://www.goodreports.org/>, a tool made by  
41 the [EQUATOR Network](#) in collaboration with [Penelope.ai](#)
  - 42  
43  
44  
45  
46  
47  
48  
49  
50  
51  
52  
53  
54  
55  
56  
57  
58  
59  
60

# BMJ Open

**Proximal Femoral Nail Unlocked Vs Locked (ProFNUL): A protocol for a multicentre, parallel armed randomised controlled trial for the effect of femoral nail mode of lag screw locking and screw configuration in the treatment of intertrochanteric femur fractures.**

|                                 |                                                                                                                                                                                                                                                                                                                                                                                                                                                                                                  |
|---------------------------------|--------------------------------------------------------------------------------------------------------------------------------------------------------------------------------------------------------------------------------------------------------------------------------------------------------------------------------------------------------------------------------------------------------------------------------------------------------------------------------------------------|
| Journal:                        | <i>BMJ Open</i>                                                                                                                                                                                                                                                                                                                                                                                                                                                                                  |
| Manuscript ID                   | bmjopen-2019-032640.R1                                                                                                                                                                                                                                                                                                                                                                                                                                                                           |
| Article Type:                   | Protocol                                                                                                                                                                                                                                                                                                                                                                                                                                                                                         |
| Date Submitted by the Author:   | 13-Nov-2019                                                                                                                                                                                                                                                                                                                                                                                                                                                                                      |
| Complete List of Authors:       | Sivakumar, Arjun; The University of Adelaide Adelaide Medical School, Centre for Orthopaedic & Trauma Research (COTR)<br>Thewlis, Dominic; The University of Adelaide Adelaide Medical School, Centre for Orthopaedic & Trauma Research<br>Ladurner, Andreas; Royal Adelaide Hospital, Department of Orthopaedics & Trauma<br>Edwards, Suzanne; The University of Adelaide, Adelaide Health Technology Assessment<br>Rickman, Mark; Royal Adelaide Hospital, Department of Orthopaedics & Trauma |
| <b>Primary Subject Heading</b>: | Surgery                                                                                                                                                                                                                                                                                                                                                                                                                                                                                          |
| Secondary Subject Heading:      | Geriatric medicine, Surgery, Medical management, Emergency medicine                                                                                                                                                                                                                                                                                                                                                                                                                              |
| Keywords:                       | Clinical trials < THERAPEUTICS, Fracture Fixation, Intramedullary nailing, Hip < ORTHOPAEDIC & TRAUMA SURGERY, Orthopaedic & trauma surgery < SURGERY, Trauma management < ORTHOPAEDIC & TRAUMA SURGERY                                                                                                                                                                                                                                                                                          |
|                                 |                                                                                                                                                                                                                                                                                                                                                                                                                                                                                                  |

SCHOLARONE™  
Manuscripts

1  
2  
3 **Title:** Proximal Femoral Nail Unlocked Vs Locked (ProFNUL): A protocol for a multicentre, parallel  
4  
5 armed randomised controlled trial for the effect of femoral nail mode of lag screw locking and screw  
6  
7 configuration in the treatment of intertrochanteric femur fractures.  
8  
9

10  
11  
12  
13  
14 **Authors:** Arjun Sivakumar<sup>1</sup>, Dominic Thewlis<sup>1</sup>, Andreas Ladurner<sup>2</sup>, Suzanne Edwards<sup>3</sup>, Mark  
15  
16 Rickman<sup>1,2</sup>  
17

18  
19 <sup>1</sup>Centre for Orthopaedic & Trauma Research, University of Adelaide, South Australia, Australia  
20

21  
22 <sup>2</sup>Department of Orthopaedics & Trauma, Royal Adelaide Hospital, South Australia, Australia  
23

24  
25 <sup>3</sup>Adelaide Health Technology Assessment, University of Adelaide, South Australia, Australia  
26  
27  
28  
29

30  
31 **Corresponding Author:**  
32

33 Arjun Sivakumar  
34

35  
36 arjun.sivakumar@adelaide.edu.au  
37

38  
39 Adelaide Health and Medical Science Building,  
40

41 Cnr North Terrace and George Street  
42

43 Adelaide SA 5000  
44

45  
46 83132621  
47  
48  
49  
50  
51

52 **Keywords:**  
53

54 Hip Fractures, Clinical Trial, Fracture Fixation, Orthopaedic Fixation Devices, Intramedullary nailing  
55  
56  
57

58 **Word Count:** 3948  
59  
60

**ABSTRACT:****Introduction:**

Intertrochanteric fractures are common fragility injuries in the elderly. Surgical fixation using intramedullary (IM) devices are one of the widely used management options. To date, evidence demonstrating the effects of lag screw configuration and the mode of lag screw locking in these devices is lacking. The purpose of this study is to investigate whether the lag screw configuration (single vs. integrated dual interlocking screw) and the mode of lag screw locking (static vs. dynamic) of a femoral nail device result in differences in clinical and functional outcomes.

**Methods and analysis:**

A multicentre, pragmatic, single-blinded randomised controlled trial (RCT) with a three-arm parallel group design is proposed. Nine-hundred intertrochanteric fracture patients (A1 and A2 AO/OTA) will be randomised to fracture treatment using a Gamma3™ nail (Stryker) (proximally dynamic) or a Trigen™ Intertan™ nail (Smith and Nephew) in a dynamic or static lag screw configuration. The primary outcome measure consists of radiological evidence of construct failure within six months following surgery, with failure being defined as breakage of the femoral nail or distal locking screw, a change in Tip-Apex Distance (TAD) of more than 10mm or lag screw cut out through the femoral head. Secondary outcomes include surgical data (operation time, fluoroscopy time), complications (surgical site infection, reoperation, patient death), return to mobility and home circumstances, functional independence, function and Pain. Patients who are able to walk independently with or without a mobility aid and are able to answer simple questions and follow instructions will be asked to participate in three dimensional (3D) gait analysis at six weeks and six months to assess hip biomechanics from this cohort. Additional secondary measures of gait speed, hip range of motion, joint contact and muscle forces and gross activity monitoring patterns will be obtained in this subgroup.

**Ethics and dissemination:**

The Central Adelaide Local Health Network Human Research Ethics Committee has approved the protocol for this RCT (HREC/17/RAH/433). The results will be disseminated via peer-reviewed publications and presentations at relevant conferences.

**Trial Registration:**

This clinical trial has been registered on the Australia New Zealand Clinical Trials Registry (ANZCTR): ACTRN12618001431213.

**ARTICLE SUMMARY****Strengths and Limitations of this study:**

- ▶ Multicentre, pragmatic, single-blinded randomised controlled trial
- ▶ The first study to investigate the effects of femoral nail lag screw locking mode on clinical and functional outcomes.
- ▶ The first study to collect 3D motion capture data from these patients post-operatively.
- ▶ Powered to detect differences in device failure between the three parallel arm groups in a large sample size (900).
- ▶ Limitations of the study include an unpredictable loss to follow up from death or failure to attend.

**INTRODUCTION:****Background and Rationale**

Proximal femur fractures are a highly prevalent injury in the elderly,<sup>1,2</sup> with an estimated 1.31 million fractures occurring worldwide each year.<sup>3,4</sup> With a growing elderly population resulting from an increasing life expectancy,<sup>5</sup> there is an increasing global incidence of these fractures,<sup>5-9</sup> projected to reach 6.26 million by the year 2050.<sup>10</sup> Fractures within the intertrochanteric region represent approximately half of all proximal femur fractures.<sup>11</sup> Treatment typically consists of

1  
2  
3 surgical fixation using either IM (e.g. proximal femoral nail (PFN, Synthes™)) or extramedullary (e.g.  
4  
5 Dynamic Hip Screw (DHS, Synthes™)) fixation devices.  
6  
7

8 Since its introduction in the 1990s, IM fixation has become increasingly popular,<sup>12</sup> with increasing  
9  
10 trends towards this device preference recorded in the United States<sup>13</sup> and Australia.<sup>14</sup> Numerous  
11  
12 types of IM fixation devices are available for clinical use,<sup>15</sup> however the optimum implant choice  
13  
14 remains unknown.<sup>16</sup> While there is evidence to support the use of these devices in the treatment of  
15  
16 intertrochanteric fractures, the evidence demonstrating whether variations in design characteristics  
17  
18 influence patient clinical outcomes is conflicting.<sup>12, 17-19</sup> As no rationale behind implant selection can  
19  
20 be drawn from the literature, there is considerable diversity regarding the choice of implant  
21  
22 between clinicians.<sup>20</sup>  
23  
24  
25

26  
27 The Gamma3™ nail (Stryker) is a well-established and widely used current generation single lag screw  
28  
29 IM device<sup>12</sup> which shows good clinical and radiographic outcomes.<sup>21-23</sup> However, complications still  
30  
31 exist, with the most frequently reported complication being cut-out of the lag screw through the  
32  
33 femoral head,<sup>24-26</sup> with an incidence rate ranging between 4% and 8%.<sup>27-29</sup> The Trigen™ Intertan™ nail  
34  
35 (Smith & Nephew) is a similar current generation IM device, featuring a dual lag screw configuration  
36  
37 comprised of a larger superior lag screw and a smaller screw integrated within the superior screw.<sup>30</sup>  
38  
39 Together, this interlocking dual-oval shaped composite screw mechanism allows for linear  
40  
41 compression of the fragments at the fracture site while providing high rotational stability.<sup>31, 32</sup> Clinical  
42  
43 studies evaluating the Intertan nail against other single screw devices have recorded a significant  
44  
45 reduction in the occurrences of implant failure, fracture site non-union, mal-union, lag screw cut out  
46  
47 and uncontrolled varus fracture collapse.<sup>30, 31, 33-35</sup> Several authors have postulated the reduced  
48  
49 complication rate being attributed to the design of this nail.<sup>30</sup> Moreover, ex vivo biomechanical  
50  
51 studies have demonstrated superior biomechanical results with the Intertan™ nail.<sup>36-39</sup> However,  
52  
53 despite the Gamma3™ nail and Trigen™ Intertan™ nail both being well-established implant choices  
54  
55  
56  
57  
58  
59  
60

1  
2  
3 used in the treatment of these fractures, very little direct comparative clinical evidence exists between  
4  
5 these nails.  
6  
7

8 A meta-analysis by Ma et al <sup>40</sup> found only nine papers, four of which included the Gamma3™ and the  
9 Intertan™. Of these four, three were randomised controlled trials comparing the two devices, but with  
10 relatively small cohort sizes. From these studies, the Intertan™ nail was shown to result in a lower  
11 incidence of implant cut out and femoral fractures which was of statistical significance. No statistically  
12 significant differences in time to union and post-operative complications were found between devices.  
13  
14 Ma et al highlighted that a limitation of this statistical analysis was the relatively small sample size of  
15 the studies included, and indicated a need for more high quality RCTs to yield a more convincing test  
16 power. <sup>40</sup> Hence, the literature reveals limited evidence of whether design characteristics of femoral  
17 nails affect clinical and patient outcomes in the treatment of trochanteric fractures.  
18  
19

20 In addition to the choice of the IM implants, other aspects of these devices used in the practical  
21 management of intertrochanteric fractures need further evaluation. This includes the mode of lag  
22 screw fixation (static or dynamic). Technically, both the Gamma3™ and Intertan™ nails can be used  
23 in static or dynamic modes of the lag screw. In the dynamic mode, fracture collapse occurs under  
24 physiological loading, resulting in macro and micromotion of the fracture fragments as well as  
25 compression/apposition of fracture fragments, <sup>41-43</sup> desired to stimulate fracture healing. However,  
26 excessive sliding of the lag screw has been shown by some authors to lead to mechanical  
27 complications and negatively affect patient function. <sup>44-46</sup>  
28  
29

30 Whilst there is evidence highlighting a reduced risk of lag screw cut out when utilizing a sliding lag  
31 screw in extramedullary devices, <sup>45, 47, 48 49, 50</sup> there is a paucity of similar evidence relating to the use  
32 of IM devices. One study compared the static and dynamic modes of the proximal lag screw in the  
33 Gamma3™ nail in 80 patients. <sup>51</sup> From this study, no statistically or clinically significant difference in  
34 Harris Hip Scores, time to fracture healing or length of hospital stay was found. No such comparative  
35 evidence exists for the Intertan™ nail. Moreover, no clinical studies to date, comparing one IM  
36  
37  
38  
39  
40  
41  
42  
43  
44  
45  
46  
47  
48  
49  
50  
51  
52  
53  
54  
55  
56  
57  
58  
59  
60



1  
2  
3 device to another has made any note of which mode of the lag screw was employed. Consequently,  
4  
5 considerable variance in practice can be seen between clinicians.  
6  
7

8 For the Gamma3 nail, it is suggested by Stryker in their operative technique guide that the device  
9  
10 has to be used in the dynamic mode, with the use of the nail in a static mode considered off label.<sup>52</sup>  
11

12 For the Intertan nail (Smith & Nephew), this decision is stated in their surgical technique guide as  
13  
14 optional with both modes considered on label,<sup>53</sup> and left to the operating surgeons decision.  
15  
16

17  
18 Considering the substantial costs attributed to the management of intertrochanteric fractures, we  
19  
20 believe that more evidence is required to evaluate the effectiveness of a single or dual screw femoral  
21  
22 nail, as well the use of these devices in the static and dynamic modes. Moreover, no previous studies  
23  
24 have compared postoperative lower extremity biomechanics in intertrochanteric fracture patients  
25  
26 treated with these devices. This proposed multicentre, parallel, three-arm randomised controlled trial  
27  
28 has been designed to fill these gaps in knowledge, and will include a two-way comparison between  
29  
30 the Gamma3™ (dynamic) and Intertan™ (dynamic) nails, as well as the Intertan™ (dynamic) and  
31  
32 Intertan™ (static) nails.  
33  
34

### 35 36 **Objectives:**

#### 37 38 **Primary Objective**

39  
40 The aim of this RCT is to investigate if there are differences in failure rates between the surgical  
41  
42 management of intertrochanteric fractures using a single screw or dual screw femoral nail, as well as  
43  
44 when using a femoral nail in either the static or dynamic modes of the lag screw.  
45  
46  
47

48  
49 It is hypothesized there will be no difference in failure rates between patients managed with a single  
50  
51 screw or dual screw femoral nail device. It is also hypothesized that there will be no difference in  
52  
53 failure rates between patients managed with a femoral nail in the static or dynamic mode of the lag  
54  
55 screw.  
56  
57  
58  
59  
60

## Secondary Objectives

Several secondary objectives will also be studied for this RCT to evaluate the effectiveness of the devices used by quantifying and drawing inferences from observed differences between treatment groups in:

- ▶ Intraoperative surgical data (operation time, fluoroscopy time, blood loss, TAD)
- ▶ Pain within six months after surgery (VAS Pain Score).
- ▶ Patient function (Functional Independence Measure) and Hip function (Harris Hip Score) within six months after surgery.
- ▶ Post-operative hip biomechanics using objective measures from gait analysis up to six months after surgery.

## Trial Design

The ProFNUL study is a multicentre, pragmatic (as defined by the Pragmatic–Explanatory Continuum Indicator Summary 2 Tool (PRECIS-2)<sup>54</sup>), single-blinded randomised controlled trial with a three-arm parallel group design.

## METHODS AND ANALYSIS

Patients will be randomised using an online computerised sequence generation service to test if there is a difference in outcomes between the treatment interventions. Recruitment, medical and surgical data collection will take place at the Royal Adelaide Hospital and Queen Elizabeth Hospital with other sites added later as required for participant numbers. Radiographic images will be collected at a diagnostic imaging practice and 3D motion capture data will be conducted at The University of Adelaide, South Australia.

This RCT has been registered with the Australian New Zealand Clinical Trials Registry (ANZCTR). Trial registration data is shown in Table 1.

This study protocol was developed in accordance with the Standard Protocol Items:  
Recommendations for Interventional Trials (SPIRIT) statement.

## Patient and Public Involvement

Patients and public were not involved in the design, conduct or reporting of this study.

**Table 1. Trial Registration Data**

| Data Category                                 | Information                                                                                                                                                                                                                                                                                                                                                                                                                                                                                                   |
|-----------------------------------------------|---------------------------------------------------------------------------------------------------------------------------------------------------------------------------------------------------------------------------------------------------------------------------------------------------------------------------------------------------------------------------------------------------------------------------------------------------------------------------------------------------------------|
| Primary registry and trial identifying number | <a href="https://www.anzctr.org.au">https://www.anzctr.org.au</a> ACTRN12618001431213                                                                                                                                                                                                                                                                                                                                                                                                                         |
| Date of registration in primary registry      | 27/08/2018                                                                                                                                                                                                                                                                                                                                                                                                                                                                                                    |
| Secondary identifying numbers                 | None                                                                                                                                                                                                                                                                                                                                                                                                                                                                                                          |
| Source of monetary or material support        | Smith & Nephew Pty Ltd                                                                                                                                                                                                                                                                                                                                                                                                                                                                                        |
| Primary sponsor                               | Royal Adelaide Hospital, Dept. of Orthopaedics & Trauma<br>Contact person: MR (mark.rickman@sa.gov.au)                                                                                                                                                                                                                                                                                                                                                                                                        |
| Secondary sponsor                             | Smith & Nephew Inc Orthopaedic Division (SN)<br>University of Adelaide, Centre for Orthopaedic & Trauma Research.<br>Contact person: AS (arjun.sivakumar@adelaide.edu.au)<br>Contact person: DT (dominic.thewlis@adelaide.edu.au)                                                                                                                                                                                                                                                                             |
| Contact for public queries                    | MR (mark.rickman@sa.gov.au)                                                                                                                                                                                                                                                                                                                                                                                                                                                                                   |
| Contact for scientific queries                | DT (dominic.thewlis@adelaide.edu.au)                                                                                                                                                                                                                                                                                                                                                                                                                                                                          |
| Public title                                  | Evaluating the treatment methods of proximal femur fractures in elderly trauma patients                                                                                                                                                                                                                                                                                                                                                                                                                       |
| Scientific title                              | A multi-centre, single-blinded prospective randomised controlled trial of the Gamma3™ intramedullary nail to the unlocked and locked Intertan™ intramedullary nail for the treatment of proximal femur fractures.                                                                                                                                                                                                                                                                                             |
| Countries of recruitment                      | Australia.                                                                                                                                                                                                                                                                                                                                                                                                                                                                                                    |
| Health problem studied                        | Proximal femur fracture                                                                                                                                                                                                                                                                                                                                                                                                                                                                                       |
| Interventions                                 | Gamma3™ Trochanteric nail (Unlocked proximally)<br>Trigen™ Intertan™ Trochanteric nail (Unlocked proximally)<br>Trigen™ Intertan™ Trochanteric nail (Locked proximally)                                                                                                                                                                                                                                                                                                                                       |
| Key inclusion and exclusion criteria          | Inclusion criteria: Traumatic extracapsular hip fracture, Closed injury, Patient aged over 60 years, Ability to be followed for up to six months, Presentation to hospital within 14 days of injury<br>Exclusion criteria: Patients with concomitant injuries affecting treatment and rehabilitation of the affected limb, Patients with associated neurovascular injuries requiring immediate surgery, Patients where consent is refused, Patient with limited English proficiency including family members. |
| Study type                                    | Randomised controlled trial                                                                                                                                                                                                                                                                                                                                                                                                                                                                                   |
| Date of first enrolment                       | 05/09/2018                                                                                                                                                                                                                                                                                                                                                                                                                                                                                                    |
| Target sample size                            | 900                                                                                                                                                                                                                                                                                                                                                                                                                                                                                                           |
| Recruitment status                            | Recruiting                                                                                                                                                                                                                                                                                                                                                                                                                                                                                                    |
| Primary Outcome                               | Construct failure (time point: up to 6 months after intervention)                                                                                                                                                                                                                                                                                                                                                                                                                                             |

|                        |                                                                                                                                                                                                                                                                                                                                                                                                                                    |
|------------------------|------------------------------------------------------------------------------------------------------------------------------------------------------------------------------------------------------------------------------------------------------------------------------------------------------------------------------------------------------------------------------------------------------------------------------------|
| Key secondary outcomes | Incidence of Injury specific complications (time point: 6 months)<br>Functional Independence (time point: 6 months)<br>Reoperation incidence (time point: 6 months)<br>Return to mobility circumstances (time point: 6 months)<br>Hip joint range of motion (time point: 6 months)<br>Hip joint contact forces (time point: 6 months)<br>Post-operative hip muscle function (abductors, flexors, extensors) (time point: 6 months) |
|------------------------|------------------------------------------------------------------------------------------------------------------------------------------------------------------------------------------------------------------------------------------------------------------------------------------------------------------------------------------------------------------------------------------------------------------------------------|

## Eligibility

Patients over 60 years of age presenting to any of the participating hospitals with an isolated, closed intertrochanteric fracture will be recruited against the following eligibility criteria:

### Inclusion criteria

1. Traumatic intertrochanteric femur fracture (A1 and A2 AO/OTA) where a decision has been made for surgical management using a femoral nail.
2. Closed injury.
3. Patients aged over 60 years.
4. Presentation to hospital within 14 days of injury.

### Exclusion criteria

1. Patients with concomitant injuries affecting treatment and rehabilitation of the affected limb.
2. Patients with associated neurovascular injuries requiring immediate surgery.
3. Patients with limited english proficiency including family members.
4. Patients where consent is refused.

All eligible patients will be provided with a study information sheet and consent form by the hospital medical staff (online supplementary appendix). If eligible patients are not able to consent due to cognitive impairment, consent will be sought from the family, in the same manner that consent for

1  
2  
3 surgery and anaesthesia occurs currently (online supplementary appendix). Randomisation will then  
4  
5 occur once consent has been obtained.  
6  
7

### 8 **Randomisation and blinding**

9

10  
11 Patients will be randomised via a computerised generation system managed by the Griffith  
12  
13 University's Clinical Trial Unit (Griffith University, QLD, Australia), allocating patients to three study  
14  
15 groups of equal weights using random block sizes of 6 and 9. Randomisation will be stratified by site  
16  
17 (3 categories), gender (2 categories), and cognitive function via Abbreviated Mental Health Test  
18  
19 Score (AMTS) (2 categories). Randomisation of the next subject will be computer-generated at the  
20  
21 time of request by a medical research officer at the hospital via the online randomisation system.  
22  
23

24  
25 Patients will be blinded to their allocation until the conclusion of the trial to reduce bias in patient  
26  
27 reported outcome measures. The statistician performing the analysis will also be blinded to the  
28  
29 group allocation. Surgeons and researchers will not be blinded to allocation.  
30  
31

### 32 **Standard Treatment Pathway**

33

34  
35 The clinical pathway for recruited patients will be unchanged from the routine for each institution;  
36  
37 surgery is typically carried out within 24-48 hours, and no changes will be necessary to any part of  
38  
39 the surgical episode with the exception of the individual device used and mode of proximal locking  
40  
41 as directed by the randomisation outcome. Training and observation will be provided to all surgeons  
42  
43 throughout the duration of this study, from senior surgeons competent with the use of both devices;  
44  
45 throughout the duration of the study it is anticipated that a large number of surgeons will carry out  
46  
47 the procedures, using both devices at all sites. This adds to the pragmatic nature of the study. All  
48  
49 fractures will be compressed proximally at the time of surgery, just prior to the nail being either  
50  
51 locked proximally or left unlocked. Similarly, post-operative management will remain unchanged  
52  
53 from routine, including discharge timing and destination. All patients will be mobilised fully weight  
54  
55 bearing as soon as possible after surgery.  
56  
57  
58  
59  
60

### Allocated Interventions

A total of 900 trauma patients with IT (31A1 and 31A2 AO/OTA) will be randomised to receive one of the three femoral nail interventions.

- ▶ Gamma3™ (Stryker) (locked proximally)
- ▶ Intertan™ (Smith & Nephew) (unlocked proximally)
- ▶ Intertan™ (Smith & Nephew) (locked proximally)

### Participant Flow Timeline

A succinct summary of the patient timeline is described by Figure 1. Once a patient has been recruited and randomised, a baseline patient registration assessment will be completed through the use of an online form. Surgery will then proceed at the earliest available opportunity as per routine for the hospital. Nail diameters are all fixed at 11mm for the Gamma3 nail, and 11.5mm for the Intertan Nail with the nail centrum collum diaphyseal (CCD) angle at 125 degrees. Following surgery, an operative information form will be completed by the operating surgeon using another online form. Upon patient discharge, medical staff will complete a patient discharge online form which includes a clinical assessment measure of functional independence (FIM score). Following discharge, follow up appointments will be scheduled to coincide with six weeks and six months with appointment letters and x-ray referrals sent from the Royal Adelaide Hospital. A week prior to each patients appointment, patients will be called to confirm their appointments or reschedule, if required. AP and lateral hip radiographs will be taken, followed by a clinical examination with an orthopaedic and trauma specialist, where measures of hip pain (Visual Analog Scale from 0 to 10) and hip function (Harris Hip Score) will be recorded. At the six month follow up, AP and lateral hip radiographs will be taken, followed by a similar clinical examination with an orthopaedic and trauma specialist. At this appointment, a measure of functional independence (FIM score) will be recorded in addition to VAS and HHS scores.

1  
2  
3 Patients who are able to walk independently with or without a mobility aid and are able to answer  
4 simple questions and follow instructions will be included in a 'biomechanics sub-group' where 3D  
5 gait analysis will be performed at the six weeks and six month follow ups immediately following the  
6 clinical examination. After the gait analysis, patients will be provided with a wrist worn activity  
7 monitor (GeneActiv Original, Activinsights Ltd, Kimbolton, UK, 100 Hz) to wear for seven days at a  
8 time, providing information on 24 hour gross physical activity patterns of these patients. Patients  
9 will be asked to complete a sleep log during this period to better distinguish sedentary time from  
10 sleep. After seven days, patients will post the monitors back via pre-paid return envelopes. Patients  
11 living rurally and unable to attend follow up appointments will have x-ray appointments organised at  
12 locations convenient to them collected over the phone by an orthopaedics and trauma specialist.  
13 Patients presenting to clinics reporting complications, will be reviewed by a clinician and radiographs  
14 taken, as per standard procedure. In these events, the occurrence of these complications is recorded  
15 against the patient's hospital number.  
16  
17  
18  
19  
20  
21  
22  
23  
24  
25  
26  
27  
28  
29  
30  
31  
32

## 33 **Outcomes**

### 34 **Primary outcome measure**

35  
36 The primary outcome measure is radiological evidence of device-bone construct failure at any point  
37 up to six months following surgery and will be assessed via AP and lateral radiographs. Failure will be  
38 defined as the occurrence of any of the following:  
39  
40  
41  
42  
43  
44

- 45 1. Breakage (mechanical fracture) of the femoral nail.<sup>55</sup>
- 46 2. Breakage (mechanical fracture) of the distal locking screw.
- 47 3. Protrusion of lag screw through the cortex of the femoral head (cut out).<sup>56</sup>
- 48 4. A change in TAD of more than 10mm.

49  
50  
51  
52  
53  
54  
55 The TAD,<sup>57</sup> measured from the tip of the lag screw to the apex of the femoral cortex in lateral and  
56 AP radiographs is generally used in clinical practice and is desirable for this measurement to be  
57  
58  
59  
60

1  
2  
3 under 25 mm. TADs larger than 25mm have been shown to serve as an accurate indicator of future  
4 protrusion of a lag screw through the femoral head (cut out).<sup>58</sup> The TAD has been shown to be  
5 reproducible to within 2-3 mm between measurements<sup>57,59</sup> and highlighted to change by 2-3 mm  
6 over time.<sup>60</sup> A change in TAD of more than 10 mm has therefore been selected as a reference level  
7 which represents failure of the IM device to maintain fracture stability.  
8  
9  
10  
11  
12  
13  
14

### 15 **Secondary outcome measures**

16  
17  
18 Secondary outcomes will also assess differences in the effectiveness between the interventions  
19 using several measures, including:  
20  
21

#### 22 *Femoral Neck Shortening*

23  
24  
25 Femoral neck shortening will be measured from the anteroposterior radiograph along the long axis  
26 of the femur. This is a frequently used measure after surgical treatment of hip fractures<sup>61,62</sup> and is  
27 regarded a reliable measure.<sup>63</sup>  
28  
29  
30  
31  
32

#### 33 *Functional Independence: FIM score*

34  
35  
36 The FIM score is a widely used instrument for measuring the severity of patient disability and  
37 dependence in rehabilitation medicine.<sup>64</sup> It has been demonstrated as a validated and reliable  
38 measure<sup>65</sup> with good interrater reliability of the total score (Intraclass correlation coefficient of  
39 0.96).<sup>66</sup>  
40  
41  
42  
43  
44  
45

#### 46 *Pain: Visual Analog Scale*

47  
48  
49 Pain will be assessed using a visual analog scale (VAS)<sup>67</sup> of categorical values from 0 to 10, with 0  
50 indicating no pain, and 10 indicating excruciating pain. The VAS pain score is a commonly used and  
51 validated measurement for patient reported acute pain.<sup>68</sup>  
52  
53  
54  
55

#### 56 *Hip Function: Harris Hip Score*



1  
2  
3 Hip function will be assessed by a clinician using the Harris Hip Score to evaluate hip function and  
4 disability across domains of pain, function, absence of deformity, and range of motion.<sup>69</sup> The Harris  
5 hip score is a well performing<sup>70</sup> and frequently used clinician based outcome measure that has  
6 shown high reliability and validity in evaluating hip function.<sup>71, 72</sup>  
7  
8  
9  
10  
11  
12

### 13 *Perioperative Data*

14  
15 Perioperative data recorded in this trial will include surgery time, fluoroscopy time, Intra-operative  
16 TAD, length of hospital stay, union time and intra-operative complications, all of which are  
17 commonly reported as valid measures across a number randomised controlled trials evaluating  
18 femoral nail devices.<sup>40, 73-77</sup> Intra-operative blood loss will also be recorded, however the reliability  
19 of this measure is unclear due to its underestimation during hip fracture surgery.<sup>78</sup>  
20  
21  
22  
23  
24  
25  
26  
27

### 28 *Injury/Surgery Specific Complications*

29  
30 Surgical complications not only affect clinical outcome parameter, but appear to be a significant and  
31 often long-term predictor of patient postoperative psychosocial outcomes.<sup>79, 80</sup> Complications  
32 recorded will include the number and type of injury and surgery specific events and complications  
33 including, technical complications, surgical site infection, unplanned surgery and death up to one  
34 year following surgery. This has been reliably collected in previous studies.<sup>81, 82</sup>  
35  
36  
37  
38  
39  
40  
41

### 42 *Re-operation*

43  
44 The number of patients presenting to clinic requiring reoperation will be recorded in this trial. The  
45 rate of re-operation is a reliable measure in assessing quality of medical treatment.<sup>83</sup>  
46  
47  
48  
49

### 50 *General Medical Complications*

51  
52 In this study, the number of patients suffering from general medical complications will be recorded.  
53 This has been collected and reported as a valid measure in the literature.<sup>80</sup>  
54  
55  
56  
57

### 58 **Secondary outcome measures: Biomechanics Sub-group**

### *Physical Mobility - Timed Up and Go*

Physical mobility will be assessed using the timed up & go test (TUG) which has been widely used in the literature<sup>84</sup> and noted to be a practical and reliable performance indicator of physical mobility.<sup>85</sup> The validity of the TUG has been highlighted with its correlation with a number of mobility and performance measures such as the Berg Balance Scale<sup>86</sup> and gait speed<sup>85,87</sup> with normative reference values available.<sup>88</sup>

### *Hip Biomechanics and Function: 3D Motion Analysis*

Using a 10 camera motion capture system (Vicon Motion Systems Ltd., Oxford, UK, 100 Hz), 3D kinematic data will be collected as patients are asked to walk short distances between two marked points at their own comfortable pace. A set of 49 retroreflective markers will be placed on anatomical landmarks of each patient to identify positions of joints, in line with standardized position and coordinate system protocols established by the International Society of Biomechanics (ISB).<sup>89</sup> In addition to the recorded 3D marker trajectories using the above motion capture setup (Vicon Motion Systems Ltd., Oxford, UK, 100 Hz), ground reaction forces will be measured via two force platforms (AMTI Optima, Watertown, MA, 2000 Hz) and well as superficial muscle activity (i.e. activation, timing and amplitude) using passive surface electromyography electrodes (Delsys, Boston, MA, 2000 Hz, Contact Material 99.99% Silver, Inter-bar spacing 10mm, CMRR > 80 dB). These electrodes will be placed on the hamstring (biceps femoris), gluteal muscles (gluteus maximus and gluteus medius), quadriceps (rectus femoris and vastus medialis) and hip adductor (adductor longus) of each leg, in line with SENIAM guidelines. This standardization ensures reliability in using 3D motion capture for the measurement gait parameters.<sup>90</sup>

An OpenSim<sup>91</sup> model will be scaled using the 3D motion data alongside the Musculoskeletal Atlas Program software (MAP) to produce patient-tailored musculoskeletal models.<sup>92</sup> Dynamic simulations will be run on the musculoskeletal models using OpenSim to calculate objective outcome measures from gait analysis including (but not limited to):

- ▶ Hip range of motion
- ▶ Hip joint contact forces
- ▶ Hip muscle force (simulated)

### *Gait Speed*

Gait speed will be calculated from the motion capture trials as a valid and reliable measure of physical performance during gait, commonly reported in the literature.<sup>93</sup>

### *24-hour activity patterns*

24-hour activity monitoring data over a seven day period will be collected at the six week and six month time points, using wearable accelerometers at the wrist (GeneActiv Original, Activinsights Ltd, Kimbolton, UK, 100 Hz). Patients will be asked to wear these activity monitors, at all times besides bathing. To better distinguish sedentary time from sleep time, patients will also be asked to fill in sleep logs. Physical activity measured using wrist worn accelerometers has been strongly correlated to gross motor activity patterns measured using waist worn monitors.<sup>94</sup> Wrist worn accelerometers will be used as opposed to waist or ankle worn accelerometers for better compliance.

### **Data Management:**

Outcome data will be entered electronically and stored in a password protected shared drive and backed up weekly to a password protected folder on the University of Adelaide's network. Only investigators will have access to the data.

### **Sample size**

Gamma3™ nail failure rates in the literature have been reported to vary from 2 to 15%.<sup>95,96</sup> We opted for a conservative failure estimate of 7.5% as it represents the mid-range of reported data.<sup>97</sup> A clinically significant difference between the two groups would be a difference of 5% between the two intervention groups. Therefore using a significance level of 0.05 and power of 80%, allowing for 30% loss to follow up at six months (including 10% mortality) and a 1.5 variance inflation factor to

1  
2  
3 allow for repeated measurements over time results in a requirement for 300 patients in each of the  
4  
5 3 groups (control group - unlocked Gamma3™ nail, and each of the intervention groups - unlocked &  
6  
7 locked Intertan™ nail).  
8  
9

## 10 **Statistical Analysis**

11  
12  
13 The primary outcome measure of device failure is considered a binary outcome (device failed/did  
14  
15 not fail). A binary logistic regression model will be performed to assess the association between the  
16  
17 outcome of device failure and the predictor of device type (Gamma3 unlocked, Intertan unlocked  
18  
19 and Intertan locked). Confounders of AMTS and gender will also be included in the model as  
20  
21 covariates as they were stratification factors in the randomisation. Post-hoc comparisons will result  
22  
23 in Odds Ratios, 95% confidence intervals, comparison P values and a global P value.  
24  
25  
26

27  
28 Some secondary outcomes are measured over two time periods. The FIM score is measured at  
29  
30 patient discharge and at six months. Therefore, a linear mixed-effects model will be used for the  
31  
32 outcome of FIM score and the interaction of time and device type, adjusting for repeated  
33  
34 measurements over time as a random effect. A logarithmic transformation of the outcome may be  
35  
36 necessary. Similarly, as pain (VAS) and Harris Hip Score are measured at six weeks and six months,  
37  
38 linear mixed-effects models will be used for these outcomes. For perioperative continuous  
39  
40 outcomes, including surgery time, fluoroscopy time, Intra-operative TAD, length of hospital stay and  
41  
42 fracture union time, the association with device type will be investigated using a linear regression.  
43  
44 For dichotomous secondary outcomes, including intra-operative complications, injury specific  
45  
46 complication rates, re-operation rates and general medical complication rates, the association with  
47  
48 device type will be investigated using binary logistic regression. Stratification variables AMTS and  
49  
50 gender will be included as covariates in all secondary regression models.  
51  
52  
53

54  
55 For the biomechanics subgroup, secondary measures of gait speed, hip range of motion, hip muscle  
56  
57 forces, and joint contact forces will be measured at six weeks and six months. Three linear mixed  
58  
59 effects models will be used with the device type (Gamma3 unlocked, Intertan unlocked and Intertan  
60

1  
2  
3 locked) as a fixed factor with timepoint as a repeated measure and the interaction of time and  
4  
5 device type. Post hoc pairwise comparisons will then be used to identify the differences in the  
6  
7 outcomes between the timepoints of six weeks and six months.  
8  
9

10 An intention-to-treat analysis will be performed (and as randomised analysis to deal with protocol  
11  
12 non-adherence). Missing data will be handled on the basis of each outcome – if a patient is missing  
13  
14 outcome data for a particular regression, they will be excluded from that regression. However, if  
15  
16 they are not missing data for the remaining outcomes, they will be included in those analyses. The  
17  
18 use of linear mixed-effects models also retains patient data when there is missing data from only  
19  
20 one time period. Evidence for a statistically significant difference will be accepted as  $p < 0.05$ . The  
21  
22 statistical software that will be used is SAS 9.4 (SAS Institute Inc., Cary, NC, USA).  
23  
24  
25  
26

### 27 **Trial oversight**

28  
29 The overall oversight of the trial will be under the responsibility of the head of the Department for  
30  
31 Orthopaedics and Trauma at the Royal Adelaide Hospital and supported by the University of  
32  
33 Adelaide's Centre for Orthopaedic & Trauma Research. A Trial Steering Committee and Data Safety  
34  
35 and Monitoring Committee (DSMC) will be set up. The TSC will comprise of the chief investigator (CI)  
36  
37 and associate investigator and will provide overall supervision. the DSMC will comprise of an  
38  
39 associate investigator, clinicians and database management staff at the Royal Adelaide Hospital. The  
40  
41 DSMC and TSC will meet prior to commencing the trial with further meetings arranged depending on  
42  
43 the trial requirements.  
44  
45  
46  
47  
48  
49  
50  
51  
52  
53

### 54 **Ethics and Dissemination**

55  
56  
57 This protocol has received ethics approval by the Central Adelaide Local Health Network Human  
58  
59 Research Ethics Committee and will be conducted in accordance to the NHMRC National Statement  
60

1  
2  
3 of Ethical Conduct in Human Research. This clinical trial has been registered on the Australia New  
4  
5 Zealand Clinical Trials Registry (ANZCTR): ACTRN12618001431213.  
6  
7

8 **Authors contributions:**  
9

10 MR, DT and AS contributed to the design and implementation of the study. AL will contribute to data  
11  
12 collection and SE will contribute to the statistical analysis of the data. AS will be responsible for data  
13  
14 collection, processing and analysis of the biomechanics subgroup. AS, AL, MR, DT and SE  
15  
16 contributed to the writing of this manuscript. All investigators will communicate any protocol  
17  
18 modifications such that amendments can be made to the relevant parties (ethics committee, trial  
19  
20 registry).  
21  
22  
23

24 **Funding statement:**  
25

26  
27 This project will be funded through an investigator initiated research grant awarded by Smith &  
28  
29 Nephew Inc Orthopaedic Division. DT is supported by a Career Development Fellowship (ID:  
30  
31 1126229) from the National Health and Medical Research Council.  
32  
33  
34

35 **Competing interests statement:**  
36

37  
38 This project is funded through an investigator initiated grant by Smith & Nephew Inc Orthopaedic  
39  
40 Division (SN). SN had no input into the study. IP is owned by the Royal Adelaide Hospital/University  
41  
42 of Adelaide.  
43  
44

45 **Patient Consent:**  
46

47  
48 Obtained.  
49  
50

51 **Protocol Version:**  
52

53  
54 Protocol Version 6. Date: 26 Jun 2019  
55  
56  
57

58 **References**  
59  
60

1. Boulton C, Bunning T, Johansen A, Judge A, Liddicoat M, Majrowski B, et al. National Hip Fracture Database: Annual Report 2017. United Kingdom: 2017.
2. Butt F, Hussain A, Khan A, Sharif M. Implants for Extracapsular Neck of Femur Fracture: Dynamic Hip Screw Versus Intramedullary Nailing. *J Ayub Med Coll Abbottabad*. 2017;29(4):697-701.
3. Harvey N, McCloskey E. Gaps and Solutions in Bone Health: A Global Framework For Improvement. 2016.
4. Johnell O, Kanis JA. An estimate of the worldwide prevalence, mortality and disability associated with hip fracture. *Osteoporos Int*. 2004;15(11):897-902.
5. Kanis JA, Oden A, McCloskey EV, Johansson H, Wahl DA, Cooper C, et al. A systematic review of hip fracture incidence and probability of fracture worldwide. *Osteoporos Int*. 2012;23(9):2239-56.
6. Kannus P, Parkkari J, Sievänen H, Heinonen A, Vuori I, Järvinen M. Epidemiology of hip fractures. *Bone*. 1996;18(1, Supplement 1):S57-S63.
7. Lippuner K, Golder M, Greiner R. Epidemiology and direct medical costs of osteoporotic fractures in men and women in Switzerland. *Osteoporosis International*. 2005;16(2):S8-S17.
8. Lyons AR. Clinical outcomes and treatment of hip fractures. *Am J Med*. 1997;103(2A):51S-63S; discussion S-4S.
9. Lakstein D, Hendel D, Haimovich Y, Feldbrin Z. Changes in the pattern of fractures of the hip in patients 60 years of age and older between 2001 and 2010: A radiological review. *Bone Joint J*. 2013;95-B(9):1250-4.
10. Cooper C, Campion G, Melton LJ. Hip fractures in the elderly: A world-wide projection. *Osteoporosis International*. 1992;2(6):285-9.
11. Jacob J, Desai A, Trompeter A. Decision Making in the Management of Extracapsular Fractures of the Proximal Femur - is the Dynamic Hip Screw the Prevailing Gold Standard? *Open Orthop J*. 2017;11:1213-7.
12. Knoke M, Gradl G, Ladenburger A, Tarkin IS, Pape H-C. Unstable Intertrochanteric Femur Fractures: Is There a Consensus on Definition and Treatment in Germany? *Clinical Orthopaedics and Related Research*. 2013;471(9):2831-40.
13. Anglen JO, Weinstein JN. Nail or plate fixation of intertrochanteric hip fractures: changing pattern of practice. A review of the American Board of Orthopaedic Surgery Database. *J Bone Joint Surg Am*. 2008;90(4):700-7.
14. ANZHF. Australia & New Zealand Hip Fracture Registry: Annual Report 2018. 2018.
15. Sambandam SN, Chandrasekharan J, Mounasamy V, Mauffrey C. Intertrochanteric fractures: a review of fixation methods. *Eur J Orthop Surg Traumatol*. 2016;26(4):339-53.
16. Parker MJ, Handoll HH. Gamma and other cephalocondylic intramedullary nails versus extramedullary implants for extracapsular hip fractures in adults. *Cochrane Database Syst Rev*. 2008(3):CD000093.
17. Socci AR, Casemyr NE, Baumgaertner MPLMR. Implant options for the treatment of intertrochanteric fractures of the hip. *The Bone & Joint Journal*. 2017;99-B:128-33.
18. Yu J, Zhang C, Li L, Kwong JS, Xue L, Zeng X, et al. Internal fixation treatments for intertrochanteric fracture: a systematic review and meta-analysis of randomized evidence. *Sci Rep*. 2015;5:18195.
19. Giordano V, Ribeiro DN, Tinoco RG, Alvim TA, Giordano M, Freitas A, et al. A Survey of Current Practices and Preferences for Internal Fixation of Trochanteric Fractures of the Femur in Brazil. *Cureus*. 2018;10(3):e2286-e.
20. Nie B, Wu D, Yang Z, Liu Q. Comparison of intramedullary fixation and arthroplasty for the treatment of intertrochanteric hip fractures in the elderly: A meta-analysis. *Medicine (Baltimore)*. 2017;96(27):e7446.
21. Giessauf C, Glehr M, Bernhardt GA, Seibert FJ, Gruber K, Sadoghi P, et al. Quality of life after peritrochanteric femoral fractures treated with a gamma nail: a single center study of 62 patients. *BMC Musculoskelet Disord*. 2012;13:214.

- 1  
2  
3 22. Kempf I, Grosse A, Taglang G, Favreul E. Gamma nail in the treatment of closed trochanteric  
4 fractures. Results and indications of 121 cases. *Orthopaedics & Traumatology: Surgery & Research*.  
5 2014;100(1):75-83.
- 6 23. Yang YH, Wang YR, Jiang SD, Jiang LS. Proximal femoral nail antirotation and third-generation  
7 Gamma nail: which is a better device for the treatment of intertrochanteric fractures? *Singapore*  
8 *Med J*. 2013;54(8):446-50.
- 9 24. Schupfner R, Kasmann LT, Wagner W, Schulz AP. Complications in Treatment of 31-A  
10 Fractures with Trochanteric Gamma Nail (TGN) Versus Gamma3 Nail (G3N) - A Review of 217 Cases.  
11 *Open Orthop J*. 2016;10:389-95.
- 12 25. Georgiannos D, Lampridis V, Bisbinas I. Complications following Treatment of Trochanteric  
13 Fractures with the Gamma3 Nail: Is the Latest Version of Gamma Nail Superior to Its Predecessor?  
14 *Surg Res Pract*. 2014;2014:143598.
- 15 26. Unger AC, Wilde E, Kienast B, Jürgens C, Schulz AP. Treatment of trochanteric fractures with  
16 the gamma3 nail - methodology and early results of a prospective consecutive monitored clinical  
17 case series. *Open Orthop J*. 2014;8:466-73.
- 18 27. Varela-Egocheaga JR, Iglesias-Colao R, Suarez-Suarez MA, Fernandez-Villan M, Gonzalez-  
19 Sastre V, Murcia-Mazon A. Minimally invasive osteosynthesis in stable trochanteric fractures: a  
20 comparative study between Gotfried percutaneous compression plate and Gamma 3 intramedullary  
21 nail. *Arch Orthop Trauma Surg*. 2009;129(10):1401-7.
- 22 28. Schipper IB, Marti RK, van der Werken C. Unstable trochanteric femoral fractures:  
23 extramedullary or intramedullary fixation. Review of literature. *Injury*. 2004;35(2):142-51.
- 24 29. Queally JM, Harris E, Handoll HH, Parker MJ. Intramedullary nails for extracapsular hip  
25 fractures in adults. *Cochrane Database Syst Rev*. 2014(9):CD004961.
- 26 30. Ruecker AH, Rupprecht M, Gruber M, Gebauer M, Barvencik F, Briem D, et al. The treatment  
27 of intertrochanteric fractures: results using an intramedullary nail with integrated cephalocervical  
28 screws and linear compression. *J Orthop Trauma*. 2009;23(1):22-30.
- 29 31. Serrano R, Blair JA, Watson DT, Infante AF, Jr., Shah AR, Mir HR, et al. Cephalomedullary Nail  
30 Fixation of Intertrochanteric Femur Fractures: Are Two Proximal Screws Better Than One? *J Orthop*  
31 *Trauma*. 2017;31(11):577-82.
- 32 32. Knoke M, Gradl G, Buecking B, Gackstatter S, Sonmez TT, Ghassemi A, et al. Locked  
33 minimally invasive plating versus fourth generation nailing in the treatment of AO/OTA 31A2.2  
34 fractures: A biomechanical comparison of PCCP((R)) and Intertan nail((R)). *Injury*. 2015;46(8):1475-  
35 82.
- 36 33. Zhang C, Xu B, Liang G, Zeng X, Zeng D, Chen D, et al. Optimizing stability in AO/OTA 31-A2  
37 intertrochanteric fracture fixation in older patients with osteoporosis. *J Int Med Res*.  
38 2018;46(5):1767-78.
- 39 34. Seyhan M, Turkmen I, Unay K, Ozkut AT. Do PFNA devices and Intertan nails both have the  
40 same effects in the treatment of trochanteric fractures? A prospective clinical study. *J Orthop Sci*.  
41 2015;20(6):1053-61.
- 42 35. Gavaskar AS, Tummala NC, Srinivasan P, Gopalan H, Karthik B, S S. Helical Blade or the  
43 Integrated Lag Screws: A Matched Pair Analysis of 100 Patients With Unstable Trochanteric  
44 Fractures. *J Orthop Trauma*. 2018;32(6):274-7.
- 45 36. Nüchtern JV, Ruecker AH, Sellenschloh K, Rupprecht M, Püschel K, Rueger JM, et al.  
46 Malpositioning of the Lag Screws by 1- or 2-screw Nailing Systems for Pertrochanteric Femoral  
47 Fractures:  
48 A Biomechanical Comparison of Gamma 3 and Intertan. *J Orthop Trauma*. 2014;28:276-82.
- 49 37. Santoni BG, Nayak AN, Cooper SA, Smithson IR, Cox JL, Marberry ST, et al. Comparison of  
50 Femoral Head Rotation and Varus Collapse Between a Single Lag Screw and Integrated Dual Screw  
51 Intertrochanteric Hip Fracture Fixation Device Using a Cadaveric Hemi-Pelvis Biomechanical Model. *J*  
52 *Orthop Trauma*. 2016;30(4):164-9.
- 53  
54  
55  
56  
57  
58  
59  
60



- 1
- 2
- 3
- 4 38. Kubiak EN, Bong M, Park SS, Kummer F, Egol K, Koval KJ. Intramedullary fixation of unstable
- 5 intertrochanteric hip fractures: one or two lag screws. *J Orthop Trauma*. 2004;18(1):12-7.
- 6 39. Kouvidis GK, Sommers MB, Giannoudis PV, Katonis PG, Bottlang M. Comparison of migration
- 7 behavior between single and dual lag screw implants for intertrochanteric fracture fixation. *J Orthop*
- 8 *Surg Res*. 2009;4:16.
- 9 40. Ma JX, Kuang MJ, Fan ZR, Xing F, Zhao YL, Zhang LK, et al. Comparison of clinical outcomes
- 10 with InterTan vs Gamma nail or PFNA in the treatment of intertrochanteric fractures: A meta-
- 11 analysis. *Sci Rep*. 2017;7(1):15962.
- 12 41. Allen WC, Piotrowski G, Burstein AH, Frankel VH. Biomechanical principles of intramedullary
- 13 fixation. *Clin Orthop Relat Res*. 1968;60:13-20.
- 14 42. Kyle RF. Biomechanics of intramedullary fracture fixation. *Orthopedics*. 1985;8(11):1356-9.
- 15 43. Perren SM. Physical and biological aspects of fracture healing with special reference to
- 16 internal fixation. *Clin Orthop Relat Res*. 1979(138):175-96.
- 17 44. Fang C, Gudushauri P, Wong T-M, Lau T-W, Pun T, Leung F. Increased Fracture Collapse after
- 18 Intertrochanteric Fractures Treated by the Dynamic Hip Screw Adversely Affects Walking Ability but
- 19 Not Survival. *BioMed Research International*. 2016;2016:8.
- 20 45. Yoo JH, Kim TY, Chang JD, Kwak YH, Kwon YS. Factors influencing functional outcomes in
- 21 united intertrochanteric hip fractures: a negative effect of lag screw sliding. *Orthopedics*.
- 22 2014;37(12):e1101-7.
- 23 46. Loch DA, Kyle RF, Bechtold JE, Kane M, Anderson K, Sherman RE. Forces required to initiate
- 24 sliding in second-generation intramedullary nails. *J Bone Joint Surg Am*. 1998;80(11):1626-31.
- 25 47. Mahomed MN, Harrington IJ, Hearn TC. Biomechanical analysis of the Medoff sliding plate. *J*
- 26 *Trauma*. 2000;48(1):93-100.
- 27 48. Euler E, Betz A, chweiberer L. The treatment of trochanteric and femoral neck fractures
- 28 using the dynamic hip screw (DHS). *Orthop Traumatol*. 1992;1(4):246-58.
- 29 49. Choueka J, Koval KJ, Kummer FJ, Crawford G, Zuckerman JD. Biomechanical comparison of
- 30 the sliding hip screw and the dome plunger. Effects of material and fixation design. *J Bone Joint Surg*
- 31 *Br*. 1995;77(2):277-83.
- 32 50. Dodds SD, Baumgaertner MR. The sliding hip screw. *Current Opinion in Orthopaedics*.
- 33 2004;15(1):12-7.
- 34 51. Zhu Y, Meili S, Zhang C, Luo C, Zeng BF. Is the lag screw sliding effective in the intramedullary
- 35 nailing in A1 and A2 AO-OTA intertrochanteric fractures? A prospective study of Sliding and None-
- 36 sliding lag screw in Gamma-III nail. *Scand J Trauma Resusc Emerg Med*. 2012;20:60.
- 37 52. Trauma S. Gamma3 Trochanteric Nail 170 & 180 Operative Technique. Gamma3
- 38 Trochanteric Nail 170 & 180 Operative Technique. Schönkirchen, Germany: Stryker; 2016. p. 33.
- 39 53. Nephew S. Trigen Intertan Trochanteric Antegrade Nail: Operative Technique. Trigen
- 40 Intertan Trochanteric Antegrade Nail: Operative Technique. Tennessee, USA: Smith & Nephew, Inc.;
- 41 2012. p. 31.
- 42 54. Loudon K, Treweek S, Sullivan F, Donnan P, Thorpe KE, Zwarenstein M. The PRECIS-2 tool:
- 43 designing trials that are fit for purpose. *BMJ : British Medical Journal*. 2015;350:h2147.
- 44 55. Mavrogenis AF, Panagopoulos GN, Megaloikonomos PD, Igoumenou VG, Galanopoulos I,
- 45 Vottis CT, et al. Complications After Hip Nailing for Fractures. *Orthopedics*. 2016;39(1):e108-16.
- 46 56. Bojan AJ, Beimel C, Taglang G, Collin D, Ekholm C, Jönsson A. Critical factors in cut-out
- 47 complication after Gamma Nail treatment of proximal femoral fractures. *BMC musculoskeletal*
- 48 *disorders*. 2013;14:1-.
- 49 57. Baumgaertner MR, Curtin AL, Lindskog DM, Keggi JM. The Value of the Tip-Apex Distance in
- 50 Predicting Failure of Fixation of Peritrochanteric Fractures of the Hip. *The Journal of Bone and Joint*
- 51 *Surgery*. 1995;77-A(7):p1058-64.
- 52 58. Geller JA, Saifi C, Morrison TA, Macaulay W. Tip-apex distance of intramedullary devices as a
- 53 predictor of cut-out failure in the treatment of peritrochanteric elderly hip fractures. *Int Orthop*.
- 54 2010;34(5):719-22.
- 55
- 56
- 57
- 58
- 59
- 60

- 1
- 2
- 3
- 4 59. De Bruijn K, den Hartog D, Tuinebreijer W, Roukema G. Reliability of predictors for screw
- 5 cutout in intertrochanteric hip fractures. *J Bone Joint Surg Am.* 2012;94(14):1266-72.
- 6 60. Aihara LJ, Nanni RA, Carvalho MS, Zamboni C, Durigan JR, Hungria Neto JS, et al. Late
- 7 postoperative analysis of the tip-apex distance (TAD) in pertrochanteric fractures: is there an
- 8 accommodation of the implant within the bone? *Injury.* 2017;48:S54-S6.
- 9 61. Felton J, Slobogean GP, Jackson SS, Della Rocca GJ, Liew S, Haverlag R, et al. Femoral Neck
- 10 Shortening After Hip Fracture Fixation Is Associated With Inferior Hip Function: Results From the
- 11 FAITH Trial. *J Orthop Trauma.* 2019;33(10):487-96.
- 12 62. Zielinski SM, Keijsers NL, Praet SF, Heetveld MJ, Bhandari M, Wilssens JP, et al. Femoral neck
- 13 shortening after internal fixation of a femoral neck fracture. *Orthopedics.* 2013;36(7):e849-58.
- 14 63. Marmor M, Nystuen C, Ehemer N, McClellan RT, Matityahu A. Accuracy of in situ neck-shaft
- 15 angle and shortening measurements of the anatomically reduced, varus malreduced and shortened
- 16 proximal femur: can we believe what we see on the postoperative films? *Injury.* 2012;43(6):846-9.
- 17 64. Linacre JM, Heinemann AW, Wright BD, Granger CV, Hamilton BB. The structure and stability
- 18 of the functional independence measure. *Archives of Physical Medicine and Rehabilitation.*
- 19 *1994;75(2):127-32.*
- 20 65. Ottenbacher KJ, Hsu Y, Granger CV, Fiedler RC. The reliability of the functional independence
- 21 measure: a quantitative review. *Arch Phys Med Rehabil.* 1996;77(12):1226-32.
- 22 66. Hamilton BB, Laughlin JA, Fiedler RC, Granger CV. Interrater reliability of the 7-level
- 23 functional independence measure (FIM). *Scand J Rehabil Med.* 1994;26(3):115-9.
- 24 67. Katz J, Melzack R. Measurement of pain. *Surg Clin North Am.* 1999;79(2):231-52.
- 25 68. Ferreira-Valente MA, Pais-Ribeiro JL, Jensen MP. Validity of four pain intensity rating scales.
- 26 *Pain.* 2011;152(10):2399-404.
- 27 69. Nilsson A, Bremander A. Measures of hip function and symptoms: Harris Hip Score (HHS),
- 28 Hip Disability and Osteoarthritis Outcome Score (HOOS), Oxford Hip Score (OHS), Lequesne Index of
- 29 Severity for Osteoarthritis of the Hip (LISOH), and American Academy of Orthopedic Surgeons
- 30 (AAOS) Hip and Knee Questionnaire. *Arthritis Care & Research.* 2011;63(S11):S200-S7.
- 31 70. Frihagen F, Grotle M, Madsen JE, Wyller TB, Mowinckel P, Nordsetten L. Outcome after
- 32 femoral neck fractures: A comparison of Harris Hip Score, Eq-5d and Barthel Index. *Injury.*
- 33 *2008;39(10):1147-56.*
- 34 71. Söderman P, Malchau H. Is the Harris Hip Score System Useful to Study the Outcome of Total
- 35 Hip Replacement? 2001. 189-97 p.
- 36 72. Hoeksma HL, Van den Ende CHM, Ronday HK, Heering A, Breedveld FC, Dekker J.
- 37 Comparison of the responsiveness of the Harris Hip Score with generic measures for hip function in
- 38 osteoarthritis of the hip. *Annals of the Rheumatic Diseases.* 2003;62(10):935.
- 39 73. Hopp S, Wirbel R, Ojodu I, Pizanis A, Pohlemann T, Fleischer J. Does the implant make the
- 40 difference ? - Prospective comparison of two different proximal femur nails. *Acta Orthop Belg.*
- 41 *2016;82(2):319-31.*
- 42 74. Berger-Groch J, Rupprecht M, Schoepper S, Schroeder M, Rueger JM, Hoffmann M. Five-Year
- 43 Outcome Analysis of Intertrochanteric Femur Fractures: A Prospective Randomized Trial Comparing
- 44 a 2-Screw and a Single-Screw Cephalomedullary Nail. *J Orthop Trauma.* 2016;30(9):483-8.
- 45 75. Su H, Sun K, Wang X. A randomized prospective comparison of Intertan and Gamma3 for
- 46 treating unstable intertrochanteric fractures. *Int J Clin Exp Med.* 2016;9(5):p8640-7.
- 47 76. Wu D, Ren G, Peng C, Zheng X, Mao F, Zhang Y. InterTan nail versus Gamma3 nail for
- 48 intramedullary nailing of unstable trochanteric fractures. *Diagn Pathol.* 2014;9:191.
- 49 77. Macefield RC, Boulind CE, Blazeby JM. Selecting and measuring optimal outcomes for
- 50 randomised controlled trials in surgery. *Langenbeck's archives of surgery.* 2014;399(3):263-72.
- 51 78. Budair B, Ahmed U, Hodson J, David M, Ashraf M, McBride T. Are we all guilty of under-
- 52 estimating intra-operative blood loss during hip fracture surgery? *Journal of Orthopaedics.*
- 53 *2017;14(1):81-4.*
- 54
- 55
- 56
- 57
- 58
- 59
- 60

- 1  
2  
3 79. Pinto A, Faiz O, Davis R, Almoudaris A, Vincent C. Surgical complications and their impact on  
4 patients' psychosocial well-being: a systematic review and meta-analysis. *BMJ Open*.  
5 2016;6(2):e007224.  
6  
7 80. Lawrence VA, Hilsenbeck SG, Noveck H, Poses RM, Carson JL. Medical complications and  
8 outcomes after hip fracture repair. *Arch Intern Med*. 2002;162(18):2053-7.  
9 81. Flikweert ER, Wendt KW, Diercks RL, Izaks GJ, Landsheer D, Stevens M, et al. Complications  
10 after hip fracture surgery: are they preventable? *European journal of trauma and emergency surgery*  
11 : official publication of the European Trauma Society. 2018;44(4):573-80.  
12 82. Kim K-H, Han KY, Kim KW, Lee JH, Chung MK. Local Postoperative Complications after  
13 Surgery for Intertrochanteric Fractures Using Cephalomedullary Nails. *Hip Pelvis*. 2018;30(3):168-74.  
14 83. Matre K, Havelin LI, Gjertsen J-E, Espehaug B, Fevang JM. Intramedullary nails result in more  
15 reoperations than sliding hip screws in two-part intertrochanteric fractures. *Clinical orthopaedics*  
16 and related research. 2013;471(4):1379-86.  
17 84. Herman T, Giladi N, Hausdorff JM. Properties of the 'timed up and go' test: more than meets  
18 the eye. *Gerontology*. 2011;57(3):203-10.  
19 85. Podsiadlo D, Richardson S. The timed "Up & Go": a test of basic functional mobility for frail  
20 elderly persons. *J Am Geriatr Soc*. 1991;39(2):142-8.  
21 86. Bennie S, Bruner K, Dizon A, Fritz H, Goodman B, Peterson S. Measurements of Balance:  
22 Comparison of the Timed "Up and Go" Test and Functional Reach Test with the Berg Balance Scale.  
23 *Journal of Physical Therapy Science*. 2003;15(2):93-7.  
24 87. Freter SH, Fruchter N. Relationship between timed 'up and go' and gait time in an elderly  
25 orthopaedic rehabilitation population. *Clin Rehabil*. 2000;14(1):96-101.  
26 88. Bohannon RW. Reference values for the timed up and go test: a descriptive meta-analysis. *J*  
27 *Geriatr Phys Ther*. 2006;29(2):64-8.  
28 89. Wu G, Siegler S, Allard P, Kirtley C, Leardini A, Rosenbaum D, et al. ISB recommendation on  
29 definitions of joint coordinate system of various joints for the reporting of human joint motion—part  
30 I: ankle, hip, and spine. *Journal of Biomechanics* 2002;35:p543–8.  
31 90. Tsushima H, Morris ME, McGinley J. Test-retest reliability and inter-tester reliability of  
32 kinematic data from a three-dimensional gait analysis system. *J Jpn Phys Ther Assoc*. 2003;6(1):9-17.  
33 91. Delp SL, Anderson FC, Arnold AS, Loan P, Habib A, John CT, et al. OpenSim: open-source  
34 software to create and analyze dynamic simulations of movement. *IEEE Trans Biomed Eng*.  
35 2007;54(11):1940-50.  
36 92. Zhang J, Fernandez J, Hislop-Jambrich J, Besier TF. Lower limb estimation from sparse  
37 landmarks using an articulated shape model. *J Biomech*. 2016;49(16):3875-81.  
38 93. Kline Mangione K, Craik RL, Lopopolo R, Tomlinson JD, Brenneman SK. Predictors of gait  
39 speed in patients after hip fracture. *Physiother Can*. 2008;60(1):10-8.  
40 94. Dieu O, Mikulovic J, Fardy PS, Bui-Xuan G, Beghin L, Vanhelst J. Physical activity using wrist-  
41 worn accelerometers: comparison of dominant and non-dominant wrist. *Clin Physiol Funct Imaging*.  
42 2017;37(5):525-9.  
43 95. Bojan AJ, Beimel C, Speitling A, Taglang G, Ekholm C, Jonsson A. 3066 consecutive Gamma  
44 Nails. 12 years experience at a single centre. *BMC Musculoskelet Disord*. 2010;11(1).  
45 96. Hoffmann S, Paetzold R, Stephan D, Puschel K, Buehren V, Augat P. Biomechanical Evaluation  
46 of Interlocking Lag Screw Design in Intramedullary Nailing of Unstable Pertrochanteric Fractures. *J*  
47 *Orthop Trauma*. 2013;27(9):483-90.  
48 97. Abram SG, Pollard TC, Andrade AJ. Inadequate 'three-point' proximal fixation predicts failure  
49 of the Gamma nail. *The Bone & Joint Journal*. 2013;95(6):825-30.  
50  
51  
52  
53  
54

## 55 Figure Legends

56  
57 **Figure 1: Patient flow diagram.**  
58  
59  
60

1  
2  
3  
4  
5  
6  
7  
8  
9  
10  
11  
12  
13  
14  
15  
16  
17  
18  
19  
20  
21  
22  
23  
24  
25  
26  
27  
28  
29  
30  
31  
32  
33  
34  
35  
36  
37  
38  
39  
40  
41  
42  
43  
44  
45  
46  
47  
48  
49  
50  
51  
52  
53  
54  
55  
56  
57  
58  
59  
60



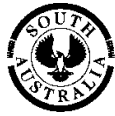**Government of South Australia**Central Northern Adelaide  
Health Service**ROYAL ADELAIDE HOSPITAL**1 Port Road  
Adelaide SA 5000Tel: +61 8 7074 0000  
ABN 80 230 154 545

www.rah.sa.gov.au

**Orthopaedic &  
Trauma Service, 5G581**Tel: +61 8 7074 2003  
Fax: +61 8 7074 6202

ProFNUL- Proximal Femoral Nail Unlocked vs Locked Trial – Participant  
Information Sheet

We are inviting you to take part in a clinical research study which is a comparison involving 2 different types of devices used to treat broken hips.

Before you decide whether to participate, it is important for you to understand why this study is being undertaken and what it will involve.

Please take time to read the following information carefully and discuss it with your family or other advisors, if you wish.

Please ask if you would like additional information or there is anything that is not clear.

Take your time to consider whether or not you wish to take part.

What is this trial about?

Broken hips such as yours are very common, and almost all are treated with an operation. At this hospital, around half of the operations for this injury involve using a device called a “Nail”, which is a rod inserted down the middle of the thigh bone to help hold the break whilst it heals. At the top of this rod there is a long screw that is inserted up towards the hip joint, that adds more stability to the broken bone.

This trial has two aims. The first is to compare two different makes of Nail – they are both well tried and tested designs, but from different companies, each considered ‘standard practise’ by different surgeons and at different hospitals. In spite of this, no direct comparison exists to help us decide which to use. The second aim of the study is related to the screw at the top of the nail. This screw can be inserted in two different ways – one is called “unlocked” which means it can slide up and down, whilst the other is called “locked” which means it is fixed in place. Some surgeons always use a “locked” mode, some always use an “unlocked” mode, and some decide for each individual case. There is no good evidence available to help guide this decision, and so we are aiming to get information from this trial to help us decide whether this screw should be fixed or allowed to slide, potentially

## Page 2 of 5

1  
2  
3 improving the future treatment of broken hips. In order to answer these  
4 questions we need to compare large numbers of patients, and our aim is to  
5 include a total of 900 patients in this study, over a 3 to 4 year period.  
6  
7

8 Why have I been asked to participate?  
9

10 You have broken your hip, and your surgeon has already decided that you  
11 need an operation using a type of Nail. We would therefore like to consider  
12 enrolling you into this trial.  
13  
14

15  
16  
17 What will happen if I agree to take part?  
18

19 If you agree to take part, you will be randomly assigned to receive one of the  
20 2 different types of Nail, and also whether the screw at the top will be locked  
21 or unlocked. Randomisation is like flipping a coin – neither you nor your  
22 treating surgeon will be able to choose which device you receive, or whether  
23 the nail is locked or unlocked at the top.  
24

25 Your operation will still take place in the normal way at the same time, by the  
26 same surgeon, the only difference will be which device is used in surgery, and  
27 how it is used with regard to the mode of the screw at the top.  
28  
29

30 After surgery we would normally review you up to one year after surgery,  
31 typically at six weeks, six months and 12 months. For this study, we are  
32 planning to review you in the clinic at six weeks and six months - we will ask  
33 you to fill out some forms to tell us about your hip pain and general function  
34 at each visit. This should take you around 20 minutes at each visit. There are  
35 no extra clinic visits required, and no extra X-rays to be taken.  
36 You will not know which Nail has been used, although we will tell you if you  
37 want to know, after the 6 month final assessment.  
38

39 In the event of general complications involving the treatment device (i.e.  
40 device failure), we may ask for consent for a bone biopsy to be taken. In this  
41 event, we will seek your consent before doing anything.  
42  
43

44  
45 Are there any risks to me if I agree to take part?  
46

47 There is no additional risk involved in the surgery or recovery process. It is  
48 possible that when the trial is complete you will have been randomly assigned  
49 to a group of patients that are shown to do less well, however it is not possible  
50 to tell that until the trial is completed. There are no out of pocket expenses  
51 associated with this trial.  
52  
53

54  
55 What if something goes wrong?  
56  
57

1  
2  
3 All surgery has some risk, which will be discussed with you separately by your  
4 treating doctor or team. The additional risk of being involved in this study is  
5 felt to be very small. However, the study is indemnified by SA Health, and in  
6 addition you retain the right to seek compensation through the legal system.  
7

#### 8 9 What will happen if I refuse to take part?

10  
11 If you don't want to take part in the trial then there is no problem with this.  
12 Your surgery will go ahead exactly as planned, and you will whichever Nail  
13 your surgeon chooses. There will be no change in your follow-up plans either.  
14

#### 15 16 17 What if I want to pull out of the study after surgery?

18  
19 If you no longer wish to participate in the trial, then you are free to withdraw at  
20 any point. There will be no effect on your care as a result of this.  
21

#### 22 23 24 What are the potential benefits of this study?

25  
26 You will not receive any direct benefits or payment for being in this study.  
27 however the information gained from this trial will help simplify decision  
28 making for future patients, and hopefully lead to also improved outcomes for  
29 the patients.  
30

#### 31 32 33 Who is organising and funding the research?

34  
35 This study is being organised and run by Associate Professor Mark Rickman,  
36 as part of the department of Orthopaedics & Trauma at the Royal Adelaide  
37 Hospital.

38 The study will be performed according to the NHMRC National Statement on  
39 Ethical Conduct in Human Research, a document prepared to protect the rights  
40 of participants in medical research studies

41 Funding has been provided via a Research Grant, that was awarded by Smith  
42 & Nephew. Smith & Nephew manufacture one of the devices used in this study,  
43 however they do not have any control of any aspect of the study (it is  
44 independent of them as the funding was awarded as a grant). In addition, the  
45 data and outcomes from the study are owned by the University of Adelaide /  
46 Royal Adelaide Hospital and not by Smith & Nephew. The company however  
47 may benefit in that this will result in publication of a large volume of outcome  
48 data on patients managed with their device.  
49

50  
51 All research in medicine is looked at by independent group of people, called a  
52 Research Ethics Committee, to protect your interests. This study has been  
53 carefully approved by the Central Adelaide Local Health Network Human  
54 Research Ethics Committee – HREC reference number: HREC/17/RAH/433  
55

### Confidentiality and Data Security

Access to your medical records for information related to your operation and any post operative events will be required by the research team.

All the information collected during the study will be kept confidential. Data will be held on a secure database in the Royal Adelaide Hospital, protected from unauthorised access.

On the database, you will be identified by a unique study number, date of birth, date of operation and surgeon who performed your operation. Only the surgeon, and members of the research team will be able to identify participant's names. All parties are bound by strict confidentiality guidelines under the Australian Data Protection Laws.

At the end of this study, the data will be stored in the same secure manner for 10 years, before being deleted.

If you agree to participate you will be asked to grant consent for our research team to access your medical notes for data entry and to auditors for the purpose of verifying accuracy of data entered.

In addition to the processes described above, data may otherwise be discoverable through processes of law or for assessing compliance with research procedures.

You have a right to access the information collected and stored by researchers about you. You also have a right to request that any information with which you disagree be corrected.

You have a right to ask that any stored specimens be destroyed but should be aware that data which has already

A description of this clinical trial will be available on [www.anzctr.org.au](http://www.anzctr.org.au), as required by the Ethics Committee. This Web site will not include information that can identify you. At most, the Web site will include a summary of the results. You can search this Web site at any time.

### What will happen to the results?

Whatever the trial shows, we plan to publish the outcome data as a paper in the medical literature, as well as present it at local and national meetings to disseminate the findings. No patients would be identified in any of these, and only total numbers of patients and outcomes will be shown.

### Who do I ask if I have more questions?

Participant Information Sheet

Version 1.3



Page 5 of 5

1  
2  
3  
4 If you have urgent questions, you can ask either the person who gave you this  
5 form, or your treating doctors. In addition, for less urgent questions you can  
6 ask the study co-ordinator A/Professor Mark Rickman, who can be contacted  
7 via his secretary on 08 707 42003.  
8

9 If you wish to speak to someone not involved in the study about your rights as  
10 a participant, you may contact the Executive Officer of the Research Ethics  
11 Committee on 08 7117 2229 or CALHNResearchEthics@sa.gov.au  
12  
13  
14  
15  
16  
17  
18  
19  
20  
21  
22  
23  
24  
25  
26  
27  
28  
29  
30  
31  
32  
33  
34  
35  
36  
37  
38  
39  
40  
41  
42  
43  
44  
45  
46  
47  
48  
49  
50  
51  
52  
53  
54  
55  
56  
57

Study No:

ProFNUL – Proximal Femoral Nail Unlocked vs Locked Study

**PATIENT CONSENT FORM**

1. I confirm that I agree to take part in this study as described to me and that I was given the opportunity to ask all of the questions I had concerning my treatment and participation and that they were all answered to my satisfaction.
2. I also confirm that I have read and understood the patient information sheet and I have had the opportunity to discuss the patient information provided for me with members of my family and/or friends.
3. I understand that I will not benefit from taking part in this study.
4. I understand that if I withdraw or become unable to complete the study on medical grounds that data gathered prior to that time point may still be used for this study.

Patient Name .....

Signature .....

Date .....

Consent Taken By .....

Role.....

Signature .....

Date .....

Surgeon Name.....

Surgeon Signature.....

Date.....

Study No:

ProFNUL – Proximal Femoral Nail Unlocked vs Locked Study

**Patient Consent Form for Gait Analysis & Activity Monitors**

1. I confirm that I agree to take part in this part of the study as described to me and that I was given the opportunity to ask all of the questions I had concerning my treatment and participation and that they were all answered to my satisfaction.
2. I also confirm that I have read and understood the separate patient information sheet and I have had the opportunity to discuss the patient information provided for me with members of my family and/or friends.
3. I understand that I will not benefit from taking part in this study.
4. I understand that if I withdraw or become unable to complete the study on medical grounds that data gathered prior to that time point may still be used for this study.

Patient Name .....

Signature .....

Date .....

Consent Taken By .....

Role.....

Signature .....

Date .....

Surgeon Name.....

Surgeon Signature.....

Date.....

Study No:

ProFNUL – Proximal Femoral Nail Unlocked vs Locked Study

**3<sup>rd</sup> Party Consent Form**

1. I confirm that I agree for .....to take part in this study as described to me and that I was given the opportunity to ask all of the questions I had concerning their treatment and participation, and that they were all answered to my satisfaction.
2. I also confirm that I have read and understood the patient information sheet and I have had the opportunity to discuss the patient information provided for me with members of my family and/or friends.
3. I understand that there is no benefit to us from taking part in this study.
4. I understand that if the patient becomes unable to complete the study on medical grounds that data gathered prior to that time point may still be used for this study.

Name ..... Relationship to Patient.....

Signature ..... Date .....

Consent Taken By ..... Role.....

Signature ..... Date .....

Surgeon Name.....

Surgeon Signature..... Date.....

# Reporting checklist for protocol of a clinical trial.

Based on the SPIRIT guidelines.

## Instructions to authors

Complete this checklist by entering the page numbers from your manuscript where readers will find each of the items listed below.

Your article may not currently address all the items on the checklist. Please modify your text to include the missing information. If you are certain that an item does not apply, please write "n/a" and provide a short explanation.

Upload your completed checklist as an extra file when you submit to a journal.

In your methods section, say that you used the SPIRIT reporting guidelines, and cite them as:

Chan A-W, Tetzlaff JM, Altman DG, Laupacis A, Gøtzsche PC, Krleža-Jerić K, Hróbjartsson A, Mann H, Dickersin K, Berlin J, Doré C, Parulekar W, Summerskill W, Groves T, Schulz K, Sox H, Rockhold FW, Rennie D, Moher D. SPIRIT 2013 Statement: Defining standard protocol items for clinical trials. *Ann Intern Med.* 2013;158(3):200-207

|                                   | Reporting Item                                                                                                                  | Page Number |
|-----------------------------------|---------------------------------------------------------------------------------------------------------------------------------|-------------|
| <b>Administrative information</b> |                                                                                                                                 |             |
| Title                             | <a href="#">#1</a> Descriptive title identifying the study design, population, interventions, and, if applicable, trial acronym | 1           |

|    |                     |                     |                                            |    |
|----|---------------------|---------------------|--------------------------------------------|----|
| 1  | Trial registration  | <a href="#">#2a</a> | Trial identifier and registry name. If not | 3  |
| 2  |                     |                     | yet registered, name of intended registry  |    |
| 3  |                     |                     |                                            |    |
| 4  |                     |                     |                                            |    |
| 5  |                     |                     |                                            |    |
| 6  | Trial registration: | <a href="#">#2b</a> | All items from the World Health            | 8  |
| 7  |                     |                     | Organization Trial Registration Data Set   |    |
| 8  | data set            |                     |                                            |    |
| 9  |                     |                     |                                            |    |
| 10 |                     |                     |                                            |    |
| 11 |                     |                     |                                            |    |
| 12 | Protocol version    | <a href="#">#3</a>  | Date and version identifier                | 20 |
| 13 |                     |                     |                                            |    |
| 14 |                     |                     |                                            |    |
| 15 | Funding             | <a href="#">#4</a>  | Sources and types of financial, material,  | 19 |
| 16 |                     |                     | and other support                          |    |
| 17 |                     |                     |                                            |    |
| 18 |                     |                     |                                            |    |
| 19 |                     |                     |                                            |    |
| 20 | Roles and           | <a href="#">#5a</a> | Names, affiliations, and roles of protocol | 19 |
| 21 |                     |                     | contributors                               |    |
| 22 | responsibilities:   |                     |                                            |    |
| 23 |                     |                     |                                            |    |
| 24 | contributorship     |                     |                                            |    |
| 25 |                     |                     |                                            |    |
| 26 |                     |                     |                                            |    |
| 27 |                     |                     |                                            |    |
| 28 | Roles and           | <a href="#">#5b</a> | Name and contact information for the       | 8  |
| 29 |                     |                     | trial sponsor                              |    |
| 30 | responsibilities:   |                     |                                            |    |
| 31 |                     |                     |                                            |    |
| 32 | sponsor contact     |                     |                                            |    |
| 33 |                     |                     |                                            |    |
| 34 | information         |                     |                                            |    |
| 35 |                     |                     |                                            |    |
| 36 |                     |                     |                                            |    |
| 37 |                     |                     |                                            |    |
| 38 | Roles and           | <a href="#">#5c</a> | Role of study sponsor and funders, if      | 19 |
| 39 |                     |                     | any, in study design; collection,          |    |
| 40 | responsibilities:   |                     | management, analysis, and                  |    |
| 41 |                     |                     | interpretation of data; writing of the     |    |
| 42 | sponsor and         |                     | report; and the decision to submit the     |    |
| 43 |                     |                     | report for publication, including whether  |    |
| 44 | funder              |                     | they will have ultimate authority over     |    |
| 45 |                     |                     | any of these activities                    |    |
| 46 |                     |                     |                                            |    |
| 47 |                     |                     |                                            |    |
| 48 |                     |                     |                                            |    |
| 49 |                     |                     |                                            |    |
| 50 |                     |                     |                                            |    |
| 51 |                     |                     |                                            |    |
| 52 |                     |                     |                                            |    |
| 53 |                     |                     |                                            |    |
| 54 |                     |                     |                                            |    |
| 55 |                     |                     |                                            |    |
| 56 |                     |                     |                                            |    |
| 57 |                     |                     |                                            |    |
| 58 |                     |                     |                                            |    |
| 59 |                     |                     |                                            |    |
| 60 |                     |                     |                                            |    |

|    |                     |                     |                                             |       |
|----|---------------------|---------------------|---------------------------------------------|-------|
| 1  | Roles and           | <a href="#">#5d</a> | Composition, roles, and responsibilities    | 18,19 |
| 2  |                     |                     |                                             |       |
| 3  | responsibilities:   |                     | of the coordinating centre, steering        |       |
| 4  |                     |                     | committee, endpoint adjudication            |       |
| 5  | committees          |                     | committee, data management team,            |       |
| 6  |                     |                     | and other individuals or groups             |       |
| 7  |                     |                     | overseeing the trial, if applicable (see    |       |
| 8  |                     |                     | Item 21a for data monitoring committee)     |       |
| 9  |                     |                     |                                             |       |
| 10 |                     |                     |                                             |       |
| 11 |                     |                     |                                             |       |
| 12 |                     |                     |                                             |       |
| 13 |                     |                     |                                             |       |
| 14 |                     |                     |                                             |       |
| 15 |                     |                     |                                             |       |
| 16 |                     |                     |                                             |       |
| 17 |                     |                     |                                             |       |
| 18 | <b>Introduction</b> |                     |                                             |       |
| 19 |                     |                     |                                             |       |
| 20 |                     |                     |                                             |       |
| 21 | Background and      | <a href="#">#6a</a> | Description of research question and        | 3     |
| 22 |                     |                     | justification for undertaking the trial,    |       |
| 23 | rationale           |                     | including summary of relevant studies       |       |
| 24 |                     |                     | (published and unpublished) examining       |       |
| 25 |                     |                     | benefits and harms for each intervention    |       |
| 26 |                     |                     |                                             |       |
| 27 |                     |                     |                                             |       |
| 28 |                     |                     |                                             |       |
| 29 |                     |                     |                                             |       |
| 30 |                     |                     |                                             |       |
| 31 |                     |                     |                                             |       |
| 32 |                     |                     |                                             |       |
| 33 | Background and      | <a href="#">#6b</a> | Explanation for choice of comparators       | 3     |
| 34 |                     |                     |                                             |       |
| 35 | rationale: choice   |                     |                                             |       |
| 36 |                     |                     |                                             |       |
| 37 | of comparators      |                     |                                             |       |
| 38 |                     |                     |                                             |       |
| 39 |                     |                     |                                             |       |
| 40 |                     |                     |                                             |       |
| 41 | Objectives          | <a href="#">#7</a>  | Specific objectives or hypotheses           | 6     |
| 42 |                     |                     |                                             |       |
| 43 |                     |                     |                                             |       |
| 44 | Trial design        | <a href="#">#8</a>  | Description of trial design including type  | 7     |
| 45 |                     |                     | of trial (eg, parallel group, crossover,    |       |
| 46 |                     |                     | factorial, single group), allocation ratio, |       |
| 47 |                     |                     | and framework (eg, superiority,             |       |
| 48 |                     |                     | equivalence, non-inferiority, exploratory)  |       |
| 49 |                     |                     |                                             |       |
| 50 |                     |                     |                                             |       |
| 51 |                     |                     |                                             |       |
| 52 |                     |                     |                                             |       |
| 53 |                     |                     |                                             |       |
| 54 |                     |                     |                                             |       |
| 55 |                     |                     |                                             |       |
| 56 |                     |                     |                                             |       |
| 57 |                     |                     |                                             |       |
| 58 |                     |                     |                                             |       |
| 59 |                     |                     |                                             |       |
| 60 |                     |                     |                                             |       |

1 **Methods:**

2

3 **Participants,**

4 **interventions, and**

5 **outcomes**

6

7

8

9

|    |                      |                      |                                            |       |
|----|----------------------|----------------------|--------------------------------------------|-------|
| 10 |                      |                      |                                            |       |
| 11 | Study setting        | <a href="#">#9</a>   | Description of study settings (eg,         | 7     |
| 12 |                      |                      | community clinic, academic hospital)       |       |
| 13 |                      |                      | and list of countries where data will be   |       |
| 14 |                      |                      | collected. Reference to where list of      |       |
| 15 |                      |                      | study sites can be obtained                |       |
| 16 |                      |                      |                                            |       |
| 17 |                      |                      |                                            |       |
| 18 |                      |                      |                                            |       |
| 19 |                      |                      |                                            |       |
| 20 |                      |                      |                                            |       |
| 21 |                      |                      |                                            |       |
| 22 |                      |                      |                                            |       |
| 23 | Eligibility criteria | <a href="#">#10</a>  | Inclusion and exclusion criteria for       | 9     |
| 24 |                      |                      | participants. If applicable, eligibility   |       |
| 25 |                      |                      | criteria for study centres and individuals |       |
| 26 |                      |                      | who will perform the interventions (eg,    |       |
| 27 |                      |                      | surgeons, psychotherapists)                |       |
| 28 |                      |                      |                                            |       |
| 29 |                      |                      |                                            |       |
| 30 |                      |                      |                                            |       |
| 31 |                      |                      |                                            |       |
| 32 |                      |                      |                                            |       |
| 33 |                      |                      |                                            |       |
| 34 |                      |                      |                                            |       |
| 35 | Interventions:       | <a href="#">#11a</a> | Interventions for each group with          | 10,11 |
| 36 |                      |                      | sufficient detail to allow replication,    |       |
| 37 | description          |                      | including how and when they will be        |       |
| 38 |                      |                      | administered                               |       |
| 39 |                      |                      |                                            |       |
| 40 |                      |                      |                                            |       |
| 41 |                      |                      |                                            |       |
| 42 |                      |                      |                                            |       |
| 43 |                      |                      |                                            |       |
| 44 |                      |                      |                                            |       |
| 45 | Interventions:       | <a href="#">#11b</a> | Criteria for discontinuing or modifying    | 11,12 |
| 46 |                      |                      | allocated interventions for a given trial  |       |
| 47 | modifications        |                      | participant (eg, drug dose change in       |       |
| 48 |                      |                      | response to harms, participant request,    |       |
| 49 |                      |                      | or improving / worsening disease)          |       |
| 50 |                      |                      |                                            |       |
| 51 |                      |                      |                                            |       |
| 52 |                      |                      |                                            |       |
| 53 |                      |                      |                                            |       |
| 54 |                      |                      |                                            |       |
| 55 |                      |                      |                                            |       |
| 56 |                      |                      |                                            |       |
| 57 |                      |                      |                                            |       |
| 58 |                      |                      |                                            |       |
| 59 |                      |                      |                                            |       |
| 60 |                      |                      |                                            |       |



|                                                                                                                                                    |                                    |                                                                                                                                                                                                                                                                                                                                                                                                    |       |
|----------------------------------------------------------------------------------------------------------------------------------------------------|------------------------------------|----------------------------------------------------------------------------------------------------------------------------------------------------------------------------------------------------------------------------------------------------------------------------------------------------------------------------------------------------------------------------------------------------|-------|
| 1<br>2<br>3<br>4<br>5<br>6<br>7<br>8<br>9<br>10                                                                                                    | Interventions:<br>adherence        | <a href="#">#11c</a> Strategies to improve adherence to intervention protocols, and any procedures for monitoring adherence (eg, drug tablet return; laboratory tests)                                                                                                                                                                                                                             | 10,11 |
| 11<br>12<br>13<br>14<br>15<br>16<br>17<br>18                                                                                                       | Interventions:<br>concomitant care | <a href="#">#11d</a> Relevant concomitant care and interventions that are permitted or prohibited during the trial                                                                                                                                                                                                                                                                                 | 11,12 |
| 19<br>20<br>21<br>22<br>23<br>24<br>25<br>26<br>27<br>28<br>29<br>30<br>31<br>32<br>33<br>34<br>35<br>36<br>37<br>38<br>39<br>40<br>41<br>42<br>43 | Outcomes                           | <a href="#">#12</a> Primary, secondary, and other outcomes, including the specific measurement variable (eg, systolic blood pressure), analysis metric (eg, change from baseline, final value, time to event), method of aggregation (eg, median, proportion), and time point for each outcome. Explanation of the clinical relevance of chosen efficacy and harm outcomes is strongly recommended | 12-16 |
| 44<br>45<br>46<br>47<br>48<br>49<br>50<br>51<br>52<br>53<br>54<br>55<br>56<br>57<br>58<br>59<br>60                                                 | Participant<br>timeline            | <a href="#">#13</a> Time schedule of enrolment, interventions (including any run-ins and washouts), assessments, and visits for participants. A schematic diagram is highly recommended (see Figure)                                                                                                                                                                                               | 10-12 |

|    |                           |                      |                                              |       |
|----|---------------------------|----------------------|----------------------------------------------|-------|
| 1  | Sample size               | <a href="#">#14</a>  | Estimated number of participants             | 17,18 |
| 2  |                           |                      |                                              |       |
| 3  |                           |                      | needed to achieve study objectives and       |       |
| 4  |                           |                      | how it was determined, including clinical    |       |
| 5  |                           |                      | and statistical assumptions supporting       |       |
| 6  |                           |                      | any sample size calculations                 |       |
| 7  |                           |                      |                                              |       |
| 8  |                           |                      |                                              |       |
| 9  |                           |                      |                                              |       |
| 10 |                           |                      |                                              |       |
| 11 |                           |                      |                                              |       |
| 12 |                           |                      |                                              |       |
| 13 | Recruitment               | <a href="#">#15</a>  | Strategies for achieving adequate            | 7     |
| 14 |                           |                      | participant enrolment to reach target        |       |
| 15 |                           |                      | sample size                                  |       |
| 16 |                           |                      |                                              |       |
| 17 |                           |                      |                                              |       |
| 18 |                           |                      |                                              |       |
| 19 |                           |                      |                                              |       |
| 20 |                           |                      |                                              |       |
| 21 | <b>Methods:</b>           |                      |                                              |       |
| 22 |                           |                      |                                              |       |
| 23 | <b>Assignment of</b>      |                      |                                              |       |
| 24 | <b>interventions (for</b> |                      |                                              |       |
| 25 | <b>controlled trials)</b> |                      |                                              |       |
| 26 |                           |                      |                                              |       |
| 27 |                           |                      |                                              |       |
| 28 |                           |                      |                                              |       |
| 29 |                           |                      |                                              |       |
| 30 |                           |                      |                                              |       |
| 31 | Allocation:               | <a href="#">#16a</a> | Method of generating the allocation          | 10    |
| 32 | sequence                  |                      | sequence (eg, computer-generated             |       |
| 33 | generation                |                      | random numbers), and list of any factors     |       |
| 34 |                           |                      | for stratification. To reduce predictability |       |
| 35 |                           |                      | of a random sequence, details of any         |       |
| 36 |                           |                      | planned restriction (eg, blocking) should    |       |
| 37 |                           |                      | be provided in a separate document that      |       |
| 38 |                           |                      | is unavailable to those who enrol            |       |
| 39 |                           |                      | participants or assign interventions         |       |
| 40 |                           |                      |                                              |       |
| 41 |                           |                      |                                              |       |
| 42 |                           |                      |                                              |       |
| 43 |                           |                      |                                              |       |
| 44 |                           |                      |                                              |       |
| 45 |                           |                      |                                              |       |
| 46 |                           |                      |                                              |       |
| 47 |                           |                      |                                              |       |
| 48 |                           |                      |                                              |       |
| 49 |                           |                      |                                              |       |
| 50 |                           |                      |                                              |       |
| 51 |                           |                      |                                              |       |
| 52 | Allocation                | <a href="#">#16b</a> | Mechanism of implementing the                | 10    |
| 53 | concealment               |                      | allocation sequence (eg, central             |       |
| 54 | mechanism                 |                      | telephone; sequentially numbered,            |       |
| 55 |                           |                      |                                              |       |
| 56 |                           |                      |                                              |       |
| 57 |                           |                      |                                              |       |
| 58 |                           |                      |                                              |       |
| 59 |                           |                      |                                              |       |
| 60 |                           |                      |                                              |       |

opaque, sealed envelopes), describing  
any steps to conceal the sequence until  
interventions are assigned

|                                                   |                      |                                                                                                                                                               |                                                                                                                                                                            |
|---------------------------------------------------|----------------------|---------------------------------------------------------------------------------------------------------------------------------------------------------------|----------------------------------------------------------------------------------------------------------------------------------------------------------------------------|
| Allocation:                                       | <a href="#">#16c</a> | Who will generate the allocation                                                                                                                              | 10                                                                                                                                                                         |
| implementation                                    |                      | sequence, who will enrol participants,<br>and who will assign participants to<br>interventions                                                                |                                                                                                                                                                            |
| Blinding (masking)                                | <a href="#">#17a</a> | Who will be blinded after assignment to<br>interventions (eg, trial participants, care<br>providers, outcome assessors, data<br>analysts), and how            | 10                                                                                                                                                                         |
| Blinding<br>(masking):<br>emergency<br>unblinding | <a href="#">#17b</a> | If blinded, circumstances under which<br>unblinding is permissible, and procedure<br>for revealing a participant's allocated<br>intervention during the trial | n/a the appropriate medical<br>staff are unblinded to the<br>allocation and in the event of<br>medical complications, the<br>device type will be known by<br>medical staff |

**Methods: Data  
collection,  
management, and  
analysis**

|                         |                      |                                                                                                                          |             |
|-------------------------|----------------------|--------------------------------------------------------------------------------------------------------------------------|-------------|
| Data collection<br>plan | <a href="#">#18a</a> | Plans for assessment and collection of<br>outcome, baseline, and other trial data,<br>including any related processes to | 10,11,12-16 |
|-------------------------|----------------------|--------------------------------------------------------------------------------------------------------------------------|-------------|

|    |                 |                                                             |       |
|----|-----------------|-------------------------------------------------------------|-------|
| 1  |                 | promote data quality (eg, duplicate                         |       |
| 2  |                 | measurements, training of assessors)                        |       |
| 3  |                 | and a description of study instruments                      |       |
| 4  |                 | (eg, questionnaires, laboratory tests)                      |       |
| 5  |                 | along with their reliability and validity, if               |       |
| 6  |                 | known. Reference to where data                              |       |
| 7  |                 | collection forms can be found, if not in                    |       |
| 8  |                 | the protocol                                                |       |
| 9  |                 |                                                             |       |
| 10 |                 |                                                             |       |
| 11 |                 |                                                             |       |
| 12 |                 |                                                             |       |
| 13 |                 |                                                             |       |
| 14 |                 |                                                             |       |
| 15 |                 |                                                             |       |
| 16 |                 |                                                             |       |
| 17 |                 |                                                             |       |
| 18 |                 |                                                             |       |
| 19 | Data collection | <a href="#">#18b</a> Plans to promote participant retention | 11,12 |
| 20 |                 |                                                             |       |
| 21 | plan: retention | and complete follow-up, including list of                   |       |
| 22 |                 | any outcome data to be collected for                        |       |
| 23 |                 | participants who discontinue or deviate                     |       |
| 24 |                 | from intervention protocols                                 |       |
| 25 |                 |                                                             |       |
| 26 |                 |                                                             |       |
| 27 |                 |                                                             |       |
| 28 |                 |                                                             |       |
| 29 |                 |                                                             |       |
| 30 |                 |                                                             |       |
| 31 | Data management | <a href="#">#19</a> Plans for data entry, coding, security, | 16,18 |
| 32 |                 | and storage, including any related                          |       |
| 33 |                 | processes to promote data quality (eg,                      |       |
| 34 |                 | double data entry; range checks for data                    |       |
| 35 |                 | values). Reference to where details of                      |       |
| 36 |                 | data management procedures can be                           |       |
| 37 |                 | found, if not in the protocol                               |       |
| 38 |                 |                                                             |       |
| 39 |                 |                                                             |       |
| 40 |                 |                                                             |       |
| 41 |                 |                                                             |       |
| 42 |                 |                                                             |       |
| 43 |                 |                                                             |       |
| 44 |                 |                                                             |       |
| 45 |                 |                                                             |       |
| 46 |                 |                                                             |       |
| 47 |                 |                                                             |       |
| 48 | Statistics:     | <a href="#">#20a</a> Statistical methods for analysing      | 17,18 |
| 49 |                 |                                                             |       |
| 50 | outcomes        | primary and secondary outcomes.                             |       |
| 51 |                 |                                                             |       |
| 52 |                 | Reference to where other details of the                     |       |
| 53 |                 | statistical analysis plan can be found, if                  |       |
| 54 |                 | not in the protocol                                         |       |
| 55 |                 |                                                             |       |
| 56 |                 |                                                             |       |
| 57 |                 |                                                             |       |
| 58 |                 |                                                             |       |
| 59 |                 |                                                             |       |
| 60 |                 |                                                             |       |

|    |                      |                      |                                            |                               |
|----|----------------------|----------------------|--------------------------------------------|-------------------------------|
| 1  | Statistics:          | <a href="#">#20b</a> | Methods for any additional analyses        | 18                            |
| 2  |                      |                      |                                            |                               |
| 3  | additional           |                      | (eg, subgroup and adjusted analyses)       |                               |
| 4  |                      |                      |                                            |                               |
| 5  | analyses             |                      |                                            |                               |
| 6  |                      |                      |                                            |                               |
| 7  |                      |                      |                                            |                               |
| 8  |                      |                      |                                            |                               |
| 9  | Statistics: analysis | <a href="#">#20c</a> | Definition of analysis population relating | 18                            |
| 10 |                      |                      |                                            |                               |
| 11 | population and       |                      | to protocol non-adherence (eg, as          |                               |
| 12 |                      |                      |                                            |                               |
| 13 | missing data         |                      | randomised analysis), and any              |                               |
| 14 |                      |                      |                                            |                               |
| 15 |                      |                      | statistical methods to handle missing      |                               |
| 16 |                      |                      |                                            |                               |
| 17 |                      |                      | data (eg, multiple imputation)             |                               |
| 18 |                      |                      |                                            |                               |
| 19 |                      |                      |                                            |                               |
| 20 |                      |                      |                                            |                               |
| 21 | <b>Methods:</b>      |                      |                                            |                               |
| 22 |                      |                      |                                            |                               |
| 23 | <b>Monitoring</b>    |                      |                                            |                               |
| 24 |                      |                      |                                            |                               |
| 25 |                      |                      |                                            |                               |
| 26 | Data monitoring:     | <a href="#">#21a</a> | Composition of data monitoring             | 18                            |
| 27 |                      |                      |                                            |                               |
| 28 | formal committee     |                      | committee (DMC); summary of its role       |                               |
| 29 |                      |                      |                                            |                               |
| 30 |                      |                      | and reporting structure; statement of      |                               |
| 31 |                      |                      |                                            |                               |
| 32 |                      |                      | whether it is independent from the         |                               |
| 33 |                      |                      |                                            |                               |
| 34 |                      |                      | sponsor and competing interests; and       |                               |
| 35 |                      |                      |                                            |                               |
| 36 |                      |                      | reference to where further details about   |                               |
| 37 |                      |                      |                                            |                               |
| 38 |                      |                      | its charter can be found, if not in the    |                               |
| 39 |                      |                      |                                            |                               |
| 40 |                      |                      | protocol. Alternatively, an explanation of |                               |
| 41 |                      |                      |                                            |                               |
| 42 |                      |                      | why a DMC is not needed                    |                               |
| 43 |                      |                      |                                            |                               |
| 44 |                      |                      |                                            |                               |
| 45 |                      |                      |                                            |                               |
| 46 |                      |                      |                                            |                               |
| 47 |                      |                      |                                            |                               |
| 48 | Data monitoring:     | <a href="#">#21b</a> | Description of any interim analyses and    | n/a trial will continue until |
| 49 |                      |                      |                                            |                               |
| 50 | interim analysis     |                      | stopping guidelines, including who will    | 900 patients are recruited    |
| 51 |                      |                      |                                            |                               |
| 52 |                      |                      | have access to these interim results and   |                               |
| 53 |                      |                      |                                            |                               |
| 54 |                      |                      | make the final decision to terminate the   |                               |
| 55 |                      |                      |                                            |                               |
| 56 |                      |                      | trial                                      |                               |
| 57 |                      |                      |                                            |                               |
| 58 |                      |                      |                                            |                               |
| 59 |                      |                      |                                            |                               |
| 60 |                      |                      |                                            |                               |

|    |                             |                      |                                               |                            |
|----|-----------------------------|----------------------|-----------------------------------------------|----------------------------|
| 1  | Harms                       | <a href="#">#22</a>  | Plans for collecting, assessing,              | n/a in this trial, adverse |
| 2  |                             |                      | reporting, and managing solicited and         | events and harms are       |
| 3  |                             |                      | spontaneously reported adverse events         | collected as complication  |
| 4  |                             |                      | and other unintended effects of trial         | information. This is       |
| 5  |                             |                      | interventions or trial conduct                | described under secondary  |
| 6  |                             |                      |                                               | outcomes.                  |
| 7  |                             |                      |                                               |                            |
| 8  |                             |                      |                                               |                            |
| 9  |                             |                      |                                               |                            |
| 10 |                             |                      |                                               |                            |
| 11 |                             |                      |                                               |                            |
| 12 |                             |                      |                                               |                            |
| 13 |                             |                      |                                               |                            |
| 14 |                             |                      |                                               |                            |
| 15 | Auditing                    | <a href="#">#23</a>  | Frequency and procedures for auditing         | 18,19                      |
| 16 |                             |                      | trial conduct, if any, and whether the        |                            |
| 17 |                             |                      | process will be independent from              |                            |
| 18 |                             |                      | investigators and the sponsor                 |                            |
| 19 |                             |                      |                                               |                            |
| 20 |                             |                      |                                               |                            |
| 21 |                             |                      |                                               |                            |
| 22 |                             |                      |                                               |                            |
| 23 |                             |                      |                                               |                            |
| 24 |                             |                      |                                               |                            |
| 25 | Ethics and<br>dissemination |                      |                                               |                            |
| 26 |                             |                      |                                               |                            |
| 27 |                             |                      |                                               |                            |
| 28 |                             |                      |                                               |                            |
| 29 |                             |                      |                                               |                            |
| 30 |                             |                      |                                               |                            |
| 31 | Research ethics<br>approval | <a href="#">#24</a>  | Plans for seeking research ethics             | 19                         |
| 32 |                             |                      | committee / institutional review board        |                            |
| 33 |                             |                      | (REC / IRB) approval                          |                            |
| 34 |                             |                      |                                               |                            |
| 35 |                             |                      |                                               |                            |
| 36 |                             |                      |                                               |                            |
| 37 |                             |                      |                                               |                            |
| 38 | Protocol<br>amendments      | <a href="#">#25</a>  | Plans for communicating important             | 19                         |
| 39 |                             |                      | protocol modifications (eg, changes to        |                            |
| 40 |                             |                      | eligibility criteria, outcomes, analyses) to  |                            |
| 41 |                             |                      | relevant parties (eg, investigators, REC      |                            |
| 42 |                             |                      | / IRBs, trial participants, trial registries, |                            |
| 43 |                             |                      | journals, regulators)                         |                            |
| 44 |                             |                      |                                               |                            |
| 45 |                             |                      |                                               |                            |
| 46 |                             |                      |                                               |                            |
| 47 |                             |                      |                                               |                            |
| 48 |                             |                      |                                               |                            |
| 49 |                             |                      |                                               |                            |
| 50 |                             |                      |                                               |                            |
| 51 |                             |                      |                                               |                            |
| 52 |                             |                      |                                               |                            |
| 53 | Consent or assent           | <a href="#">#26a</a> | Who will obtain informed consent or           | 9                          |
| 54 |                             |                      | assent from potential trial participants or   |                            |
| 55 |                             |                      |                                               |                            |
| 56 |                             |                      |                                               |                            |
| 57 |                             |                      |                                               |                            |
| 58 |                             |                      |                                               |                            |
| 59 |                             |                      |                                               |                            |
| 60 |                             |                      |                                               |                            |

|    |                    |                                                                 |                                |
|----|--------------------|-----------------------------------------------------------------|--------------------------------|
| 1  |                    | authorised surrogates, and how (see                             |                                |
| 2  |                    | Item 32)                                                        |                                |
| 3  |                    |                                                                 |                                |
| 4  |                    |                                                                 |                                |
| 5  |                    |                                                                 |                                |
| 6  | Consent or         | <a href="#">#26b</a> Additional consent provisions for          | n/a patients will be           |
| 7  |                    |                                                                 |                                |
| 8  | assent: ancillary  | collection and use of participant data                          | consented for the trial and    |
| 9  |                    |                                                                 |                                |
| 10 | studies            | and biological specimens in ancillary                           | informed that the data will be |
| 11 |                    | studies, if applicable                                          | used for medical research.     |
| 12 |                    |                                                                 |                                |
| 13 |                    |                                                                 |                                |
| 14 |                    |                                                                 |                                |
| 15 | Confidentiality    | <a href="#">#27</a> How personal information about              | n/a all information collected  |
| 16 |                    | potential and enrolled participants will                        | is described in the protocol.  |
| 17 |                    |                                                                 |                                |
| 18 |                    | be collected, shared, and maintained in                         | See pg 10, 11-16               |
| 19 |                    |                                                                 |                                |
| 20 |                    | order to protect confidentiality before,                        |                                |
| 21 |                    | during, and after the trial                                     |                                |
| 22 |                    |                                                                 |                                |
| 23 |                    |                                                                 |                                |
| 24 |                    |                                                                 |                                |
| 25 |                    |                                                                 |                                |
| 26 |                    |                                                                 |                                |
| 27 |                    |                                                                 |                                |
| 28 | Declaration of     | <a href="#">#28</a> Financial and other competing interests     | 19                             |
| 29 |                    |                                                                 |                                |
| 30 | interests          | for principal investigators for the overall                     |                                |
| 31 |                    | trial and each study site                                       |                                |
| 32 |                    |                                                                 |                                |
| 33 |                    |                                                                 |                                |
| 34 |                    |                                                                 |                                |
| 35 | Data access        | <a href="#">#29</a> Statement of who will have access to        | 16,18                          |
| 36 |                    |                                                                 |                                |
| 37 |                    | the final trial dataset, and disclosure of                      |                                |
| 38 |                    | contractual agreements that limit such                          |                                |
| 39 |                    | access for investigators                                        |                                |
| 40 |                    |                                                                 |                                |
| 41 |                    |                                                                 |                                |
| 42 |                    |                                                                 |                                |
| 43 |                    |                                                                 |                                |
| 44 |                    |                                                                 |                                |
| 45 | Ancillary and post | <a href="#">#30</a> Provisions, if any, for ancillary and post- | n/a both devices used in this  |
| 46 |                    |                                                                 |                                |
| 47 | trial care         | trial care, and for compensation to those                       | trial are FDA approved and     |
| 48 |                    |                                                                 |                                |
| 49 |                    | who suffer harm from trial participation                        | widely used devices.           |
| 50 |                    |                                                                 |                                |
| 51 |                    |                                                                 |                                |
| 52 |                    |                                                                 | Patients presenting with       |
| 53 |                    |                                                                 |                                |
| 54 |                    |                                                                 | medical complications will be  |
| 55 |                    |                                                                 |                                |
| 56 |                    |                                                                 | managed as standard            |
| 57 |                    |                                                                 |                                |
| 58 |                    |                                                                 |                                |
| 59 |                    |                                                                 |                                |
| 60 |                    |                                                                 |                                |

procedure at the site

patients present to.

|    |                       |                      |                                            |                              |
|----|-----------------------|----------------------|--------------------------------------------|------------------------------|
| 1  |                       |                      |                                            |                              |
| 2  |                       |                      |                                            |                              |
| 3  |                       |                      |                                            |                              |
| 4  |                       |                      |                                            |                              |
| 5  |                       |                      |                                            |                              |
| 6  | Dissemination         | <a href="#">#31a</a> | Plans for investigators and sponsor to     | 3                            |
| 7  |                       |                      |                                            |                              |
| 8  | policy: trial results |                      | communicate trial results to participants, |                              |
| 9  |                       |                      |                                            |                              |
| 10 |                       |                      | healthcare professionals, the public, and  |                              |
| 11 |                       |                      |                                            |                              |
| 12 |                       |                      | other relevant groups (eg, via             |                              |
| 13 |                       |                      |                                            |                              |
| 14 |                       |                      | publication, reporting in results          |                              |
| 15 |                       |                      |                                            |                              |
| 16 |                       |                      | databases, or other data sharing           |                              |
| 17 |                       |                      |                                            |                              |
| 18 |                       |                      | arrangements), including any               |                              |
| 19 |                       |                      |                                            |                              |
| 20 |                       |                      | publication restrictions                   |                              |
| 21 |                       |                      |                                            |                              |
| 22 |                       |                      |                                            |                              |
| 23 |                       |                      |                                            |                              |
| 24 |                       |                      |                                            |                              |
| 25 | Dissemination         | <a href="#">#31b</a> | Authorship eligibility guidelines and any  | 19                           |
| 26 |                       |                      |                                            |                              |
| 27 | policy: authorship    |                      | intended use of professional writers       |                              |
| 28 |                       |                      |                                            |                              |
| 29 |                       |                      |                                            |                              |
| 30 | Dissemination         | <a href="#">#31c</a> | Plans, if any, for granting public access  | n/a No plans for participant |
| 31 |                       |                      |                                            |                              |
| 32 | policy:               |                      | to the full protocol, participant-level    | level data to be made        |
| 33 |                       |                      |                                            |                              |
| 34 | reproducible          |                      | dataset, and statistical code              | publically available         |
| 35 |                       |                      |                                            |                              |
| 36 |                       |                      |                                            |                              |
| 37 | research              |                      |                                            |                              |
| 38 |                       |                      |                                            |                              |
| 39 |                       |                      |                                            |                              |
| 40 | <b>Appendices</b>     |                      |                                            |                              |
| 41 |                       |                      |                                            |                              |
| 42 |                       |                      |                                            |                              |
| 43 | Informed consent      | <a href="#">#32</a>  | Model consent form and other related       | Model consent forms will be  |
| 44 |                       |                      |                                            |                              |
| 45 | materials             |                      | documentation given to participants and    | uploaded as additional       |
| 46 |                       |                      |                                            |                              |
| 47 |                       |                      | authorised surrogates                      | document                     |
| 48 |                       |                      |                                            |                              |
| 49 |                       |                      |                                            |                              |
| 50 |                       |                      |                                            |                              |
| 51 | Biological            | <a href="#">#33</a>  | Plans for collection, laboratory           | n/a                          |
| 52 |                       |                      |                                            |                              |
| 53 | specimens             |                      | evaluation, and storage of biological      |                              |
| 54 |                       |                      |                                            |                              |
| 55 |                       |                      | specimens for genetic or molecular         |                              |
| 56 |                       |                      |                                            |                              |
| 57 |                       |                      |                                            |                              |
| 58 |                       |                      |                                            |                              |
| 59 |                       |                      |                                            |                              |
| 60 |                       |                      |                                            |                              |



1 analysis in the current trial and for future

2 use in ancillary studies, if applicable

3  
4  
5  
6 Notes:

- 7  
8
- 9 • 17b: n/a the appropriate medical staff are unblinded to the allocation and in the event of medical  
10 complications, the device type will be known by medical staff
  - 11  
12
  - 13 • 18a: 10,11,12-16
  - 14  
15
  - 16 • 21b: n/a trial will continue until 900 patients are recruited
  - 17  
18
  - 19 • 22: n/a in this trial, adverse events and harms are collected as complication information. This is  
20 described under secondary outcomes.
  - 21  
22
  - 23 • 26b: n/a patients will be consented for the trial and informed that the data will be used for medical  
24 research.
  - 25  
26
  - 27 • 27: n/a all information collected is described in the protocol. See pg 10, 11-16
  - 28  
29
  - 30 • 30: n/a both devices used in this trial are FDA approved and widely used devices. Patients  
31 presenting with medical complications will be managed as standard procedure at the site patients  
32 present to.
  - 33  
34
  - 35 • 31c: n/a No plans for participant level data to be made publically available
  - 36  
37
  - 38 • 32: Model consent forms will be uploaded as additional document The SPIRIT checklist is  
39 distributed under the terms of the Creative Commons Attribution License CC-BY-ND 3.0. This  
40 checklist was completed on 26. June 2019 using <https://www.goodreports.org/>, a tool made by  
41 the [EQUATOR Network](#) in collaboration with [Penelope.ai](#)
  - 42  
43  
44  
45  
46  
47  
48  
49  
50  
51  
52  
53  
54  
55  
56  
57  
58  
59  
60
